# Supplementary material for: Collapse of the mammoth-steppe in central Yukon as revealed by ancient environmental DNA
Source: PubMed Central journal article supplement (PMC8654998; doi:10.1038/s41467-021-27439-6), 2021-12-08
Supplement: 41467_2021_27439_MOESM1_ESM.pdf [file 41467_2021_27439_MOESM1_ESM.pdf]

# Supplementary Information

## Collapse of the mammoth-steppe in central Yukon as revealed by ancient environmental DNA

|                                                              |    |
|--------------------------------------------------------------|----|
| List of tables .....                                         | 2  |
| List of figures .....                                        | 3  |
| 1. Supplementary Notes .....                                 | 6  |
| 1.1 Palaeontology background .....                           | 6  |
| 1.2 Archaeology background .....                             | 8  |
| 2. Supplementary Methods and Results.....                    | 14 |
| 2.1 Site descriptions .....                                  | 15 |
| 2.2 Bayesian age-depth modelling figures and tables .....    | 18 |
| 2.3 Palynology.....                                          | 22 |
| 2.4 Ancient DNA wet lab additional methods and results ..... | 25 |
| 2.4.1 Pre-sequencing qPCR concentration estimates.....       | 25 |
| 2.4.2 Master mix recipe tables .....                         | 28 |
| 2.5 Bioinformatic supplement .....                           | 34 |
| 2.5.1 Full sample list with core replicates .....            | 34 |
| 2.5.2 Normalized read proportions by site.....               | 36 |
| 2.5.3 Assessing ancient DNA damage .....                     | 39 |
| 2.5.4 <i>mapDamage</i> plots .....                           | 42 |
| 2.5.5 Depurination and deamination rates .....               | 56 |
| 2.5.6 Taxonomic binning replicate comparison.....            | 63 |
| 2.5.7 GC content and ghost range fragment lengths.....       | 86 |
| 3. Supplementary References .....                            | 88 |

## List of tables

|                                                                                                                               |    |
|-------------------------------------------------------------------------------------------------------------------------------|----|
| Supplementary Table 1 Bestiary of Pleistocene-Holocene extinctions based on Stuart <sup>1</sup> .....                         | 6  |
| Supplementary Table 2 Potter et al. <sup>14</sup> data of earliest archaeological sites in northwestern North<br>America..... | 12 |
| Supplementary Table 3 Permafrost cores and radiocarbon dates used in Bayesian age-depth<br>modelling.....                     | 21 |
| Supplementary Table 4 Raw palynomorph and non-pollen palynomorph counts .....                                                 | 24 |
| Supplementary Table 5 Proteinase K digestion solution .....                                                                   | 28 |
| Supplementary Table 6 Guanidinium binding buffer .....                                                                        | 28 |
| Supplementary Table 7 Library preparation: blunt-end repair.....                                                              | 28 |
| Supplementary Table 8 Library preparation: adapter ligation .....                                                             | 29 |
| Supplementary Table 9 Library preparation: adapter fill-in .....                                                              | 29 |
| Supplementary Table 10 Indexing PCR.....                                                                                      | 30 |
| Supplementary Table 11 Pre-indexing qPCR short amplification, total quant .....                                               | 31 |
| Supplementary Table 12 Enrichment master-mixes .....                                                                          | 32 |
| Supplementary Table 13 Post-indexing/enrichment qPCR long amplification, total quant .....                                    | 33 |
| Supplementary Table 14 Sequencing summary and assigned reads of extraction replicates .....                                   | 34 |

## List of figures

|                                                                                                                                                                                                |    |
|------------------------------------------------------------------------------------------------------------------------------------------------------------------------------------------------|----|
| Supplementary Figure 1 Radiocarbon dated fossils for eastern Beringian megafauna over the last 30,000 years from Conroy et al. (2020). .....                                                   | 7  |
| Supplementary Figure 2 Beringia during the Late Pleistocene.....                                                                                                                               | 10 |
| Supplementary Figure 3 Radiocarbon calibration plot of the earliest alleged archaeological sites in northwestern North America. ....                                                           | 11 |
| Supplementary Figure 4 Workflow schematic from wet-lab procedures (extraction through sequencing) to <i>in silico</i> data analysis.....                                                       | 14 |
| Supplementary Figure 5 Upper Quartz permafrost exposure; age model for horizontal cores collected in 2012. ....                                                                                | 18 |
| Supplementary Figure 6 Lucky Lady II permafrost exposure. A) Age model for three vertical cores collected at the site. B) Plate from Mahony <sup>34</sup> .....                                | 19 |
| Supplementary Figure 7 Upper Goldbottom permafrost exposure. A) Age model for horizontal cores collected at the site. B) Plates from Mahony <sup>34</sup> .....                                | 20 |
| Supplementary Figure 8 Pre-indexing short amplification qPCR assay for estimating total adapted DNA concentrations. ....                                                                       | 26 |
| Supplementary Figure 9 Post-enrichment long amplification qPCR assay for estimating total adapted DNA concentrations following targeted capture for equimolar pooling.....                     | 27 |
| Supplementary Figure 10 Lucky Lady II stacked normalized reads assigned to the rank ‘family’ in A) Animalia (insects excluded) with read counts, and B) Viridiplantae with proportions.....    | 36 |
| Supplementary Figure 11 Upper Goldbottom stacked normalized reads assigned to the rank ‘family’ in A) Animalia (insects excluded) with read counts, and B) Viridiplantae with proportions..... | 37 |
| Supplementary Figure 12 Upper Quartz stacked normalized reads assigned to the rank ‘family’ in A) Animalia (insects excluded) with read counts, and B) Viridiplantae with proportions.....     | 38 |
| Supplementary Figure 13 On-target mapped reads for <i>Picea</i> .....                                                                                                                          | 40 |
| Supplementary Figure 14 Off-target mapped reads for <i>Picea</i> .....                                                                                                                         | 41 |
| Supplementary Figure 15 <i>Mammuthus primigenius</i> mapDamage plots and fragment length distributions.....                                                                                    | 42 |
| Supplementary Figure 16 <i>Equus</i> mapDamage plots and fragment length distributions.....                                                                                                    | 43 |

|                                                                                                                                                                                               |    |
|-----------------------------------------------------------------------------------------------------------------------------------------------------------------------------------------------|----|
| Supplementary Figure 17 <i>Bison priscus</i> mapDamage plots and fragment length distributions.....                                                                                           | 44 |
| Supplementary Figure 18 <i>Rangifer tarandus</i> mapDamage plots and fragment length distributions. ....                                                                                      | 45 |
| Supplementary Figure 19 <i>Alces alces</i> mapDamage plots and fragment length distributions. ....                                                                                            | 46 |
| Supplementary Figure 20 <i>Ovis canadensis</i> mapDamage plots and fragment length distributions. ....                                                                                        | 47 |
| Supplementary Figure 21 <i>Lagopus lagopus</i> mapDamage plots and fragment length distributions. ....                                                                                        | 48 |
| Supplementary Figure 22 <i>Lepus americanus</i> mapDamage plots and fragment length distributions. ....                                                                                       | 49 |
| Supplementary Figure 23 <i>Microtus agrestis</i> mapDamage plots and fragment length distributions. ....                                                                                      | 50 |
| Supplementary Figure 24 <i>Uroitellus richardsonii</i> mapDamage plots and fragment length<br>distributions.....                                                                              | 51 |
| Supplementary Figure 25 <i>Poa palustris</i> mapDamage plots and fragment length distributions.....                                                                                           | 52 |
| Supplementary Figure 26 <i>Artemisia frigida</i> mapDamage plots and fragment length distributions. ....                                                                                      | 53 |
| Supplementary Figure 27 <i>Salix interior</i> mapDamage plots and fragment length distributions.....                                                                                          | 54 |
| Supplementary Figure 28 <i>Picea glauca</i> mapDamage plots and fragment length distributions.....                                                                                            | 55 |
| Supplementary Figure 29 Plotted edit distances for reads mapped to the <i>Salix interior</i> chloroplast<br>reference genome.....                                                             | 58 |
| Supplementary Figure 30 Fragment misincorporation plots to confirm the presence of hydrolytic<br>deamination for reads mapped to the <i>Salix interior</i> chloroplast reference genome ..... | 59 |
| Supplementary Figure 31 Deamination rate of <i>Salix interior</i> mapped reads against time.....                                                                                              | 60 |
| Supplementary Figure 32 Deamination rate of <i>Salix interior</i> mapped reads compared with the<br>temporally nearest Greenland Ice Sheet Project 2 (GISP2) oxygen-18 isotope value .....    | 61 |
| Supplementary Figure 33 Depurination rate of <i>Salix interior</i> mapped reads against time.....                                                                                             | 62 |
| Supplementary Figure 34 PHP-1 replicates comparison with <i>PIA</i> and <i>MEGAN</i> taxonomic binning.....                                                                                   | 64 |
| Supplementary Figure 35 PHP-2 replicates comparison with <i>PIA</i> and <i>MEGAN</i> taxonomic binning.....                                                                                   | 65 |
| Supplementary Figure 36 PHP-3 replicates comparison with <i>PIA</i> and <i>MEGAN</i> taxonomic binning.....                                                                                   | 66 |
| Supplementary Figure 37 PHP-4 replicates comparison with <i>PIA</i> and <i>MEGAN</i> taxonomic binning.....                                                                                   | 67 |
| Supplementary Figure 38 PHP-5 replicates comparison with <i>PIA</i> and <i>MEGAN</i> taxonomic binning.....                                                                                   | 68 |
| Supplementary Figure 39 PHP-6 replicates comparison with <i>PIA</i> and <i>MEGAN</i> taxonomic binning.....                                                                                   | 69 |
| Supplementary Figure 40 PHP-7 replicates comparison with <i>PIA</i> and <i>MEGAN</i> taxonomic binning.....                                                                                   | 70 |
| Supplementary Figure 41 PHP-8 replicates comparison with <i>PIA</i> and <i>MEGAN</i> taxonomic binning.....                                                                                   | 71 |

|                                                                                                              |    |
|--------------------------------------------------------------------------------------------------------------|----|
| Supplementary Figure 42 PHP-9 replicates comparison with <i>PIA</i> and <i>MEGAN</i> taxonomic binning.....  | 72 |
| Supplementary Figure 43 PHP-11 replicates comparison with <i>PIA</i> and <i>MEGAN</i> taxonomic binning..... | 73 |
| Supplementary Figure 44 PHP-12 replicates comparison with <i>PIA</i> and <i>MEGAN</i> taxonomic binning..... | 74 |
| Supplementary Figure 45 PHP-13 replicates comparison with <i>PIA</i> and <i>MEGAN</i> taxonomic binning..... | 75 |
| Supplementary Figure 46 PHP-14 replicates comparison with <i>PIA</i> and <i>MEGAN</i> taxonomic binning..... | 76 |
| Supplementary Figure 47 PHP-15 replicates comparison with <i>PIA</i> and <i>MEGAN</i> taxonomic binning..... | 77 |
| Supplementary Figure 48 PHP-19 replicates comparison with <i>PIA</i> and <i>MEGAN</i> taxonomic binning..... | 78 |
| Supplementary Figure 49 PHP-20 replicates comparison with <i>PIA</i> and <i>MEGAN</i> taxonomic binning..... | 79 |
| Supplementary Figure 50 PHP-21 replicates comparison with <i>PIA</i> and <i>MEGAN</i> taxonomic binning..... | 80 |
| Supplementary Figure 51 PHP-22 replicates comparison with <i>PIA</i> and <i>MEGAN</i> taxonomic binning..... | 81 |
| Supplementary Figure 52 PHP-23 replicates comparison with <i>PIA</i> and <i>MEGAN</i> taxonomic binning..... | 82 |
| Supplementary Figure 53 PHP-24 replicates comparison with <i>PIA</i> and <i>MEGAN</i> taxonomic binning..... | 83 |
| Supplementary Figure 54 PHP-24 replicates comparison with <i>PIA</i> and <i>MEGAN</i> taxonomic binning..... | 84 |
| Supplementary Figure 55 Blanks comparison with <i>PIA</i> and <i>MEGAN</i> taxonomic binning. ....           | 85 |
| Supplementary Figure 56 Assessing GC content of reference sequences and binned reads.....                    | 86 |
| Supplementary Figure 57 Ghost range fragment length comparison (absolute unique read counts) ....            | 87 |

## 1. Supplementary Notes

### 1.1 Palaeontology background

**Supplementary Table 1** Bestiary of Pleistocene-Holocene extinctions based on Stuart<sup>1</sup>.

| Losses from 40,000–15,000 cal BP                      |                                                                                                  |                                                                                 |
|-------------------------------------------------------|--------------------------------------------------------------------------------------------------|---------------------------------------------------------------------------------|
| Eurasia                                               | Beringia                                                                                         | North America south of ice sheets                                               |
| <i>Ursus spelaeus</i><br>(cave bear)                  | <i>Arctodus simus</i><br>(short-faced bear)                                                      | <i>Eremotherium rusconii</i> (E. laurillardi sloth)                             |
| <i>Crocota crocuta</i><br>(spotted hyaena)            | <i>Homotherium serum</i><br>(a sabretooth cat)                                                   | <i>Glyptotherium floridanum</i> (a glyptodont)                                  |
| <i>Panthera spelaea</i><br>(cave lion)                |                                                                                                  | <i>Holmesina septentrionalis</i> ('giant armadillo')                            |
| <i>Megaloceros giganteus</i><br>(giant deer)          |                                                                                                  | <i>Paramylodon (Glossotherium) harlani</i> (Harlan's ground sloth)              |
| <i>Palaeoloxodon naumanni</i><br>(Naumann's elephant) |                                                                                                  | <i>Miracinonyx trumani</i> (American cheetah)                                   |
| <i>Homotherium latidens</i><br>(a sabretooth cat)     |                                                                                                  | <i>Homotherium serum</i> (a sabretooth)                                         |
|                                                       |                                                                                                  | <i>Canis dirus</i> (dire wolf)                                                  |
| Losses after 15,000 cal BP to mid-Holocene            |                                                                                                  |                                                                                 |
| Eurasia                                               | Beringia                                                                                         | North America south of ice sheets                                               |
| <i>Coelodonta antiquitatis</i><br>(woolly rhino)      | <i>Mammuthus primigenius</i><br>(woolly mammoth)                                                 | <i>Panthera atrox</i> (American lion)                                           |
| <i>Panthera spelaea</i> (cave lion)                   | <i>Panthera spelaea</i> (cave lion)                                                              | <i>Arctodus simus</i> (short-faced bear)                                        |
| <i>Mammuthus primigenius</i><br>(woolly mammoth)      | <i>Saiga tatarica</i> (saiga antelope)                                                           | <i>Megalonyx jeffersonii</i> (Jefferson's ground sloth)                         |
| <i>Bison priscus</i> (steppe bison)                   | <i>Equus caballus</i> (caballine horse)                                                          | <i>Mammuthus columbi</i> (Columbian mammoth)                                    |
| <i>Megaloceros giganteus</i><br>(giant deer)          | <i>Haringtonhippus francisci</i><br>(New World stilt-legged horse)                               | <i>Mammuthus primigenius</i> (woolly mammoth)                                   |
|                                                       | <i>Bootherium bombifrons</i><br>(Harlan's musk ox)                                               | <i>Mammut americanum</i> (mastodon)                                             |
|                                                       | <i>Bison priscus</i> (steppe bison)<br>(DNA evidence suggests persistence until ~400 yrs cal BP) | Equidae (horses)                                                                |
|                                                       |                                                                                                  | <i>Platygonus compressus</i> and <i>Mylohyus nasutus</i><br>(extinct peccaries) |
|                                                       |                                                                                                  | <i>Palaeolama mirifica</i> (extinct lama)                                       |
|                                                       |                                                                                                  | <i>Hemiauchenia macrocephala</i> (large-headed lama)                            |
|                                                       |                                                                                                  | <i>Cervalces scotti</i> (extinct moose)                                         |
|                                                       |                                                                                                  | <i>Bootherium bombifrons</i> (Harlan's musk ox)                                 |
|                                                       |                                                                                                  | <i>Navahoceros fricki</i> (American mountain deer)                              |
|                                                       |                                                                                                  | <i>Stockoceros onusrosagris</i> (a pronghorn)                                   |
|                                                       |                                                                                                  | <i>Camelops hesternus</i> (western camel)                                       |
|                                                       |                                                                                                  | <i>Castoroides ohioensis</i> (giant beaver)                                     |
|                                                       |                                                                                                  | <i>Smilodon fatalis</i> (a sabretooth)                                          |
|                                                       |                                                                                                  | <i>Nothrotheriops shastensis</i> (Shasta ground sloth)                          |
|                                                       |                                                                                                  | <i>Oreamnos harringtoni</i> (extinct mountain goat)                             |
|                                                       |                                                                                                  | <i>Bison priscus</i> (steppe bison)                                             |

\*List is not exhaustive.

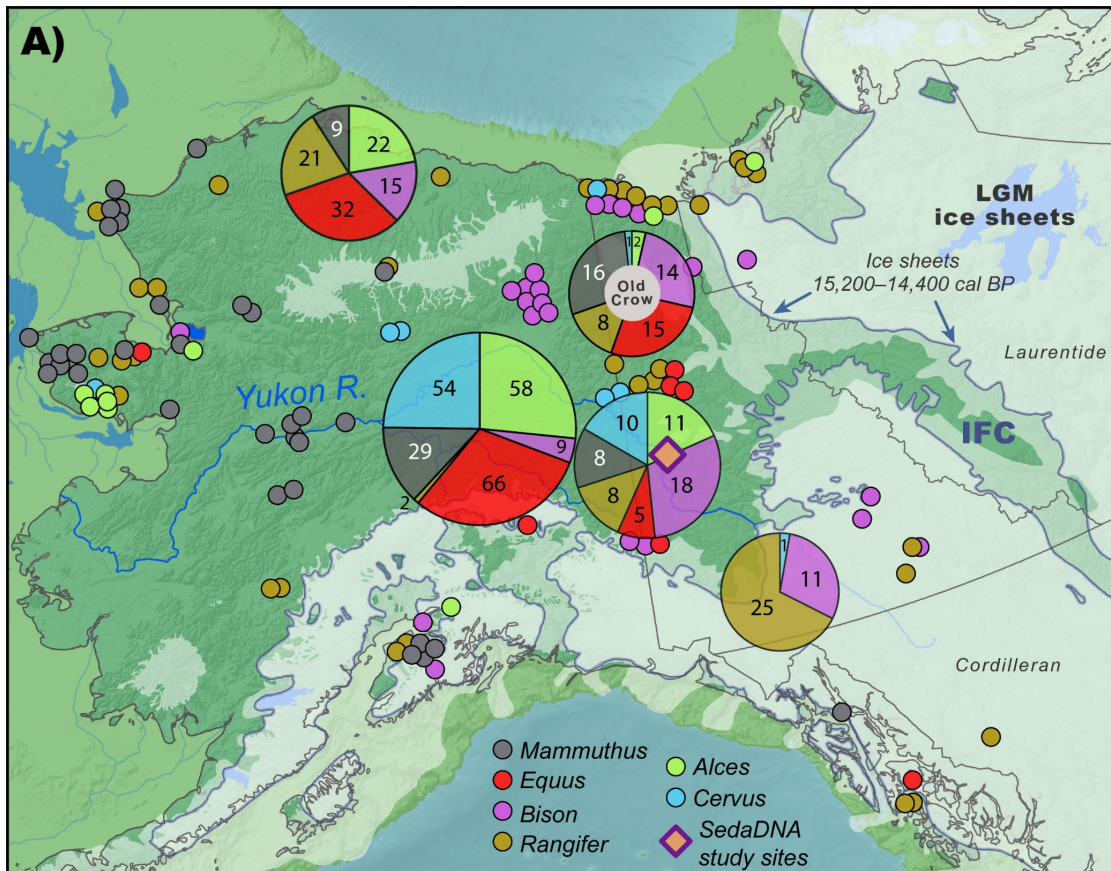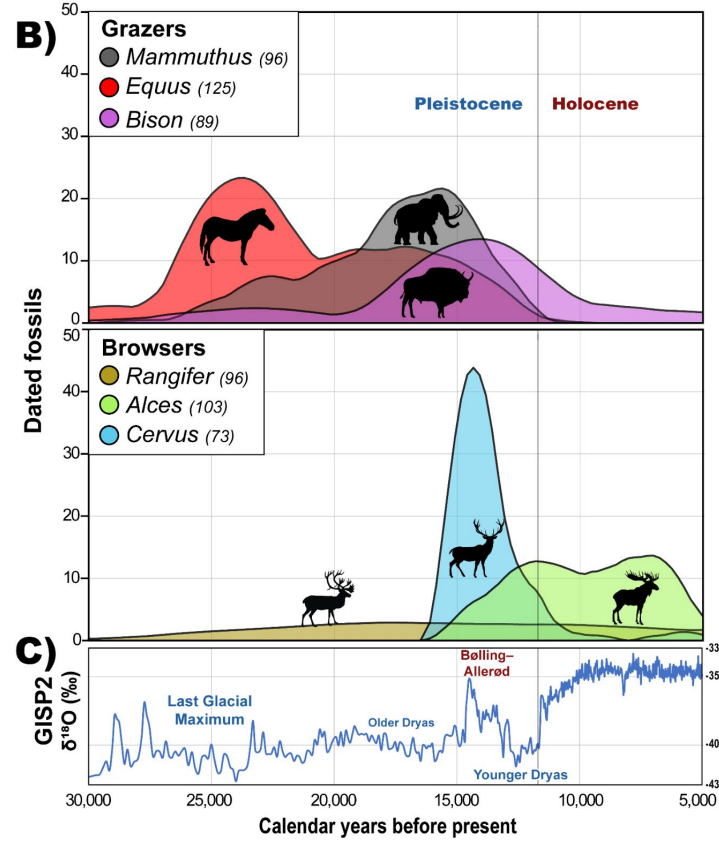

**Supplementary Figure 1**  
 Radiocarbon dated fossils for eastern Beringian megafauna over the last 30,000 years from Conroy et al.<sup>61</sup>  
**A)** Approximate coordinates of radiocarbon dated fossils with point jitter and summary pie charts for overlap from a small number of well-studied sites. See Supplementary Figure 2 for basemap details.  
**B)** Distribution (kernel density) plots for <30 kya grazing and browsing megafaunal fossils generated in SYSTAT (v13).  
**C)** Greenland Ice Sheet Project 2 (GISP2) oxygen isotope profiles at 2 meter intervals as a proxy for palaeo-climate<sup>62</sup>.

## 1.2 Archaeology background

Assessing when humans became ecologically significant in eastern Beringia is relevant to understanding whether anthropogenic pressures could have contributed to declining megafaunal populations prior to the collapse of the mammoth-steppe ecosystem. The first people to inhabit the northwestern portions of unglaciated North America arrived from Siberia following dispersal across the exposed Bering Isthmus. Humans may have reached the Siberian arctic coast, west of the Yenisey River as early as ~45,000 cal BP<sup>2,3</sup> (Supplementary Figure 2). Evidence during this period is fragmentary, but these first northern peoples had sophisticated Upper Palaeolithic technologies, including prepared lithic blade-cores and abundant bone tools<sup>4,5</sup>. The earliest evidence of humans in western Beringia, east of the Lena River<sup>6</sup>, is ~32,000 cal yr BP<sup>7</sup>. This site has an abundance of faunal remains, including lithic and osseous tools, and projectile point fragments embedded in two differently-aged woolly mammoths<sup>7</sup>.

Humans appear to have thrived in Siberia until the peak of the Last Glacial Maximum (LGM, 26,500–19,000 BP)<sup>8</sup>, although to date it appears as if these populations largely remained in western Beringia<sup>6</sup>. A series of alleged archaeological components at Bluefish Caves I and II in northern Yukon date to as early as ~23,800 years ago<sup>9,10</sup> based on bones that have been debatably interpreted to exhibit human-made cut-marks and other modifications. Sedimentary biomarkers of faecal sterols and polycyclic aromatic hydrocarbons have also been controversially interpreted to be suggestive of a human presence on the Alaskan North Slope from 34,000–16,000 cal BP, along with a rise in fire activity<sup>11</sup>. However, the strongest evidence of sustained human occupations of ecological significance in eastern Beringia comes from sites in the Tanana River Valley, Alaska, chiefly at Swan Point CZ<sub>4</sub><sup>12,13</sup> dating to ~14,000 years ago<sup>14</sup>.

Middle Upper Palaeolithic occupations around Lake Baikal and the Yenisey and Lena drainages in Siberia have evidence of semi-subterranean dwellings, storage pits, diverse faunal remains (large-to-small mammals, birds), and a substantial quantity of lithic debris and other artifacts<sup>6,15–18</sup>. These people hunted a variety of megafauna, including: *Mammuthus primigenius* (woolly mammoth), *Coelodonta antiquitatis* (woolly rhinoceros), *Bison priscus* (steppe bison), *Rangifer tarandus* (reindeer), and *Equus caballus* (horse)<sup>6,19</sup>. There may have been an abandonment of much of Siberia and Beringia during the LGM due to the extreme cold climatic conditions<sup>4,17,19–24</sup>, although this is contested<sup>25–27</sup>. It



has been hypothesized that people may have taken refuge farther south in the Russian Far East and on the Palaeo-Sakhalin-Hokkaido-Kuril Peninsula in present day northern Japan<sup>4,28,29</sup>.

The people who came to reoccupy Beringia after the LGM seem to have had substantially different lifeways from their predecessors. Late Upper Palaeolithic populations in Siberia had developed a mobile settlement system technologically based on a highly economical and portable use of lithic raw material: microblades<sup>30</sup>. Sites after ~21,000 cal BP lack semi-subterranean dwellings and storage pits<sup>6</sup> and have thin occupation layers with single taxon dominant faunal assemblages<sup>4</sup>. This change in lifeways towards high residential mobility may have been adapted to perusing the shifting ranges of mobile herd fauna<sup>17,22</sup>.

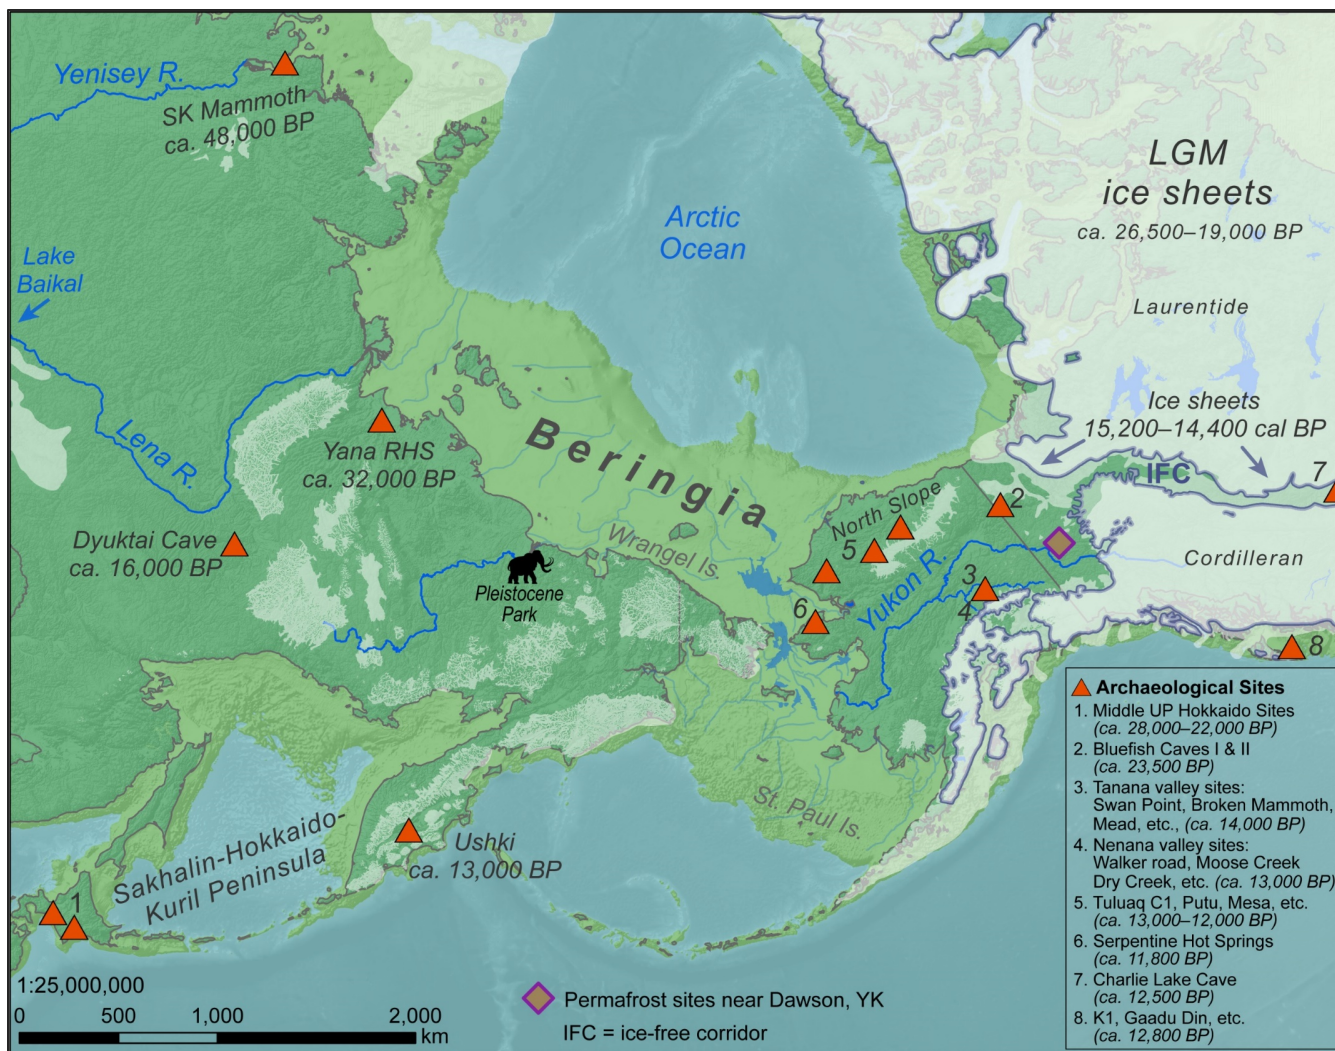

**Supplementary Figure 2** Beringia during the Late Pleistocene. Includes select archaeological sites and geographic areas discussed in text. Ice sheet data at Last Glacial Maximum (LGM, 26,500–19,000 BP) (Clark, 2009) and 12,500 <sup>14</sup>C BP (15,200–14,400 cal BP) from Dyke (2004). Sea level during LGM set to 126 meters below sea level based on midpoint between maximum and minimum eustatic sea level estimation models in Clark and Mix (2002). Beringian palaeodrainage data from Bond (2019) (<http://data.geology.gov.yk.ca/>). Archaeological sites with calibrated ages from Potter et al.<sup>14</sup>. Pleistocene Park: <https://pleistocenepark.ru/>.

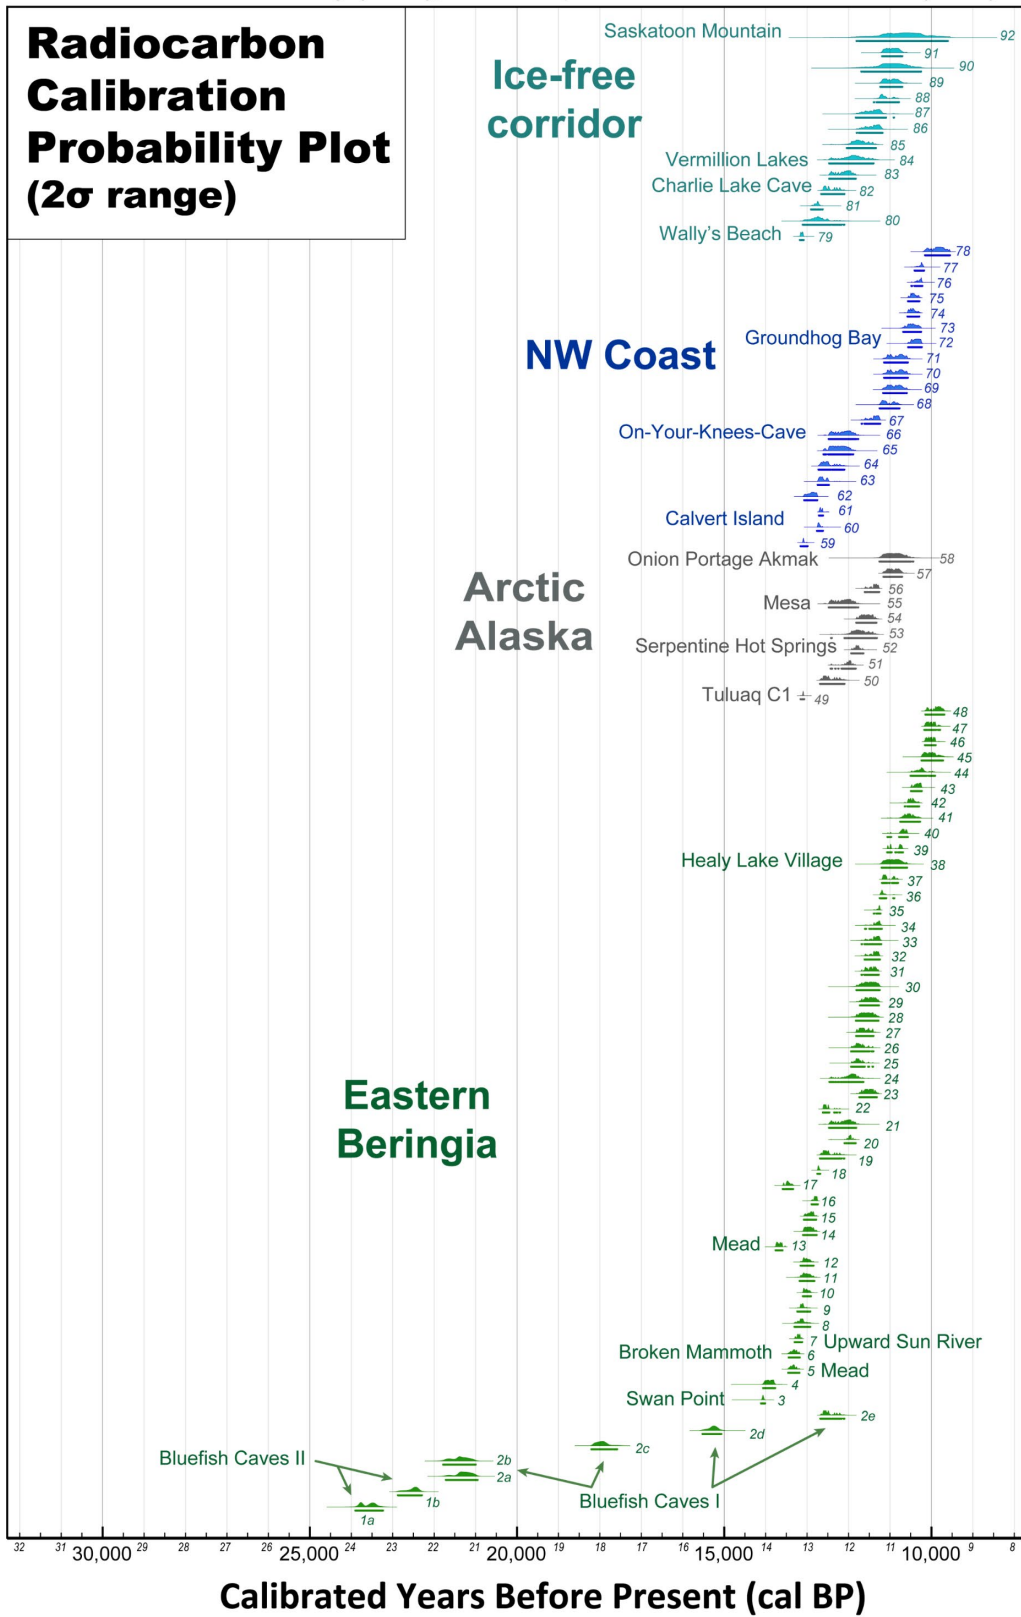

**Supplementary Figure 3**  
Radiocarbon calibration plot of the earliest alleged archaeological sites in northwestern North America. Data compiled by Potter et al.<sup>14</sup>. Calibrated using Oxcal v.4.4.2<sup>31</sup> and the IntCal20 calibration curve<sup>32</sup>. See the supplementary materials of Potter et al.<sup>14</sup> for the original data, and Supplementary Table 2 for the calibrations.

**Supplementary Table 2** Potter et al.<sup>14</sup> data of earliest archaeological sites in northwestern North America.

| Intcal ID | Site/Component              | Radiocarbon age                    |     |            | Calibrated age |        |                     | Area               | Reference in Potter et al. (2018) |
|-----------|-----------------------------|------------------------------------|-----|------------|----------------|--------|---------------------|--------------------|-----------------------------------|
|           |                             | <sup>14</sup> C yr BP <sup>1</sup> | ±   | n of dates | From           | To     | Median cal years BP |                    |                                   |
| 1a        | Bluefish Caves II           | 19,650                             | 130 | 7          | 23,900         | 23,234 | 23,561              | Beringian Interior | 49                                |
| 1b        | Bluefish Caves II           | 18570                              | 110 | 7          | 22,873         | 22,299 | 22,490              | Beringian Interior | 49                                |
| 2a        | Bluefish Caves I            | 17,610                             | 100 | 7          | 21,715         | 20,954 | 21,268              | Beringian Interior | 49                                |
| 2b        | Bluefish Caves I            | 17,660                             | 100 | 7          | 21,780         | 21,000 | 21,362              | Beringian Interior | 49                                |
| 2c        | Bluefish Caves I            | 14,645                             | 75  | 7          | 18,205         | 17,586 | 17,961              | Beringian Interior | 49                                |
| 2d        | Bluefish Caves I            | 12,790                             | 65  | 7          | 15,525         | 15,072 | 15,262              | Beringian Interior | 49                                |
| 2e        | Bluefish Caves I            | 10,490                             | 55  | 7          | 12,680         | 12,103 | 12,514              | Beringian Interior | 49                                |
| 3         | Swan Point CZ4              | 12,160                             | 20  | 8          | 14,110         | 14,015 | 14,064              | Beringian Interior | 83                                |
| 4         | Little John sub-paleosol    | 12,020                             | 70  | 1          | 14,061         | 13,771 | 13,913              | Beringian Interior | 84                                |
| 5         | Mead CZ5                    | 11,460                             | 50  | 1          | 13,455         | 13,188 | 13,337              | Beringian Interior | 75                                |
| 6         | Broken Mammoth CZ4          | 11,440                             | 60  | 2          | 13,445         | 13,179 | 13,313              | Beringian Interior | 85                                |
| 7         | Upward Sun River C1         | 11,320                             | 30  | 3          | 13,300         | 13,121 | 13,211              | Beringian Interior | 86                                |
| 8         | Walker Road C1              | 11,220                             | 90  | 3          | 13,304         | 12,925 | 13,134              | Beringian Interior | 87                                |
| 9         | Moose Creek C1              | 11,190                             | 60  | 1          | 13,234         | 12,927 | 13,114              | Beringian Interior | 88                                |
| 10        | Linda's Point               | 11,100                             | 40  | 2          | 13,100         | 12,910 | 13,021              | Beringian Interior | 89                                |
| 11        | Dry Creek C1                | 11,120                             | 90  | 1          | 13,180         | 12,826 | 13,019              | Beringian Interior | 90                                |
| 12        | Owl Ridge C1                | 11,110                             | 60  | 2          | 13,157         | 12,847 | 13,018              | Beringian Interior | 91-92                             |
| 13        | Mead CZ4                    | 11,808                             | 20  | 5          | 13,760         | 13,595 | 13,678              | Beringian Interior | 75                                |
| 14        | Bachner C1                  | 11,030                             | 70  | 1          | 13,095         | 12,771 | 12,956              | Beringian Interior | 93                                |
| 15        | Teklanika West C1           | 11,000                             | 40  | 2          | 13,076         | 12,785 | 12,919              | Beringian Interior | 94                                |
| 16        | Eroadaway                   | 10,890                             | 40  | 1          | 12,890         | 12,744 | 12,799              | Beringian Interior | 95                                |
| 17        | MacDonald Creek (FAI-2043)  | 11,600                             | 50  | 1          | 13,585         | 13,339 | 13,462              | Beringian Interior | 96-97                             |
| 18        | MacDonald Creek (FAI-2043)  | 10,730                             | 40  | 1          | 12,753         | 12,684 | 12,724              | Beringian Interior | 96-97                             |
| 19        | Moose Creek C2              | 10,500                             | 60  | 1          | 12,689         | 12,103 | 12,524              | Beringian Interior | 88                                |
| 20        | Mead CZ3                    | 10,270                             | 20  | 5          | 12,096         | 11,830 | 11,966              | Beringian Interior | 98                                |
| 21        | Broken Mammoth CZ3          | 10,290                             | 70  | 1          | 12,470         | 11,818 | 12,079              | Beringian Interior | 85                                |
| 22        | Owl Ridge C2                | 10,490                             | 30  | 7          | 12,620         | 12,206 | 12,554              | Beringian Interior | 91-92                             |
| 23        | Owl Ridge C2                | 10,020                             | 40  | 6          | 11,738         | 11,318 | 11,516              | Beringian Interior | 91-92                             |
| 24        | Phipps                      | 10,230                             | 70  | 1          | 12,459         | 11,643 | 11,928              | Beringian Interior | 99                                |
| 25        | Upward Sun River C2         | 10,140                             | 40  | 2          | 11,937         | 11,410 | 11,769              | Beringian Interior | 86                                |
| 26        | FAI-2077                    | 10,130                             | 50  | 1          | 11,938         | 11,403 | 11,742              | Beringian Interior | 96-97                             |
| 27        | Swan Point CZ3              | 10,080                             | 40  | 3          | 11,816         | 11,401 | 11,639              | Beringian Interior | 83                                |
| 28        | XBD-308                     | 10,050                             | 70  | 1          | 11,821         | 11,280 | 11,567              | Beringian Interior | 100                               |
| 29        | XBD-338 C1                  | >10000                             | 80* | 1          | 11,726         | 11,269 | 11,483              | Beringian Interior | 100                               |
| 30        | XBD-338 C2                  | 10,000                             | 80  | 1          | 11,808         | 11,250 | 11,500              | Beringian Interior | 100                               |
| 31        | Upward Sun River C3         | 9,990                              | 30  | 3          | 11,687         | 11,273 | 11,454              | Beringian Interior | 101                               |
| 32        | Whitmore Ridge C1           | 9,950                              | 40  | 3          | 11,612         | 11,245 | 11,361              | Beringian Interior | 102                               |
| 33        | Little Delta River #3       | 9,920                              | 60  | 1          | 11,684         | 11,212 | 11,346              | Beringian Interior | 100                               |
| 34        | Panguingue Creek C1         | 9,890                              | 50  | 3          | 11,603         | 11,201 | 11,297              | Beringian Interior | 103                               |
| 35        | Carlo Creek C1              | 9,880                              | 20  | 6          | 11,390         | 11,229 | 11,261              | Beringian Interior | 104                               |
| 36        | Gerstle River C1            | 9,740                              | 40  | 1          | 11,245         | 10,897 | 11,188              | Beringian Interior | 105                               |
| 37        | Dry Creek C2                | 9,660                              | 30  | 9          | 11,193         | 10,807 | 11,101              | Beringian Interior | 90                                |
| 38        | Healy Lake Village Chindadn | 9,580                              | 110 | 2          | 11,201         | 10,589 | 10,922              | Beringian Interior | 106                               |
| 39        | Little John Paleosol        | 9,510                              | 20  | 6          | 11,068         | 10,688 | 10,771              | Beringian Interior | 84                                |
| 40        | Gerstle River               | 9,450                              | 40  | 2          | 11,061         | 10,571 | 10,681              | Beringian Interior | 105                               |
| 41        | XBD-303                     | 9,340                              | 80  | 1          | 10,751         | 10,275 | 10,544              | Beringian Interior | 100                               |
| 42        | XBD-312                     | 9,290                              | 40  | 1          | 10,643         | 10,297 | 10,480              | Beringian Interior | 100                               |
| 43        | Sparks Point                | 9,170                              | 50  | 3          | 10,493         | 10,235 | 10,334              | Beringian Interior | 107                               |
| 44        | Chugwater C2                | 9,080                              | 90  | 2          | 10,502         | 9,915  | 10,248              | Beringian Interior | 108-109                           |
| 45        | XBD-306                     | 8,930                              | 90  | 1          | 10,240         | 9,720  | 10,024              | Beringian Interior | 100                               |
| 46        | Gerstle River C3            | 8880                               | 20  | 9          | 10,157         | 9,900  | 10,026              | Beringian Interior | 105                               |
| 47        | Upward Sun River C4         | 8,870                              | 30  | 2          | 10,170         | 9,793  | 10,014              | Beringian Interior | 86                                |
| 48        | Teklanika West C2           | 8,820                              | 40  | 1          | 10,147         | 9,690  | 9,863               | Beringian Interior | 94                                |
| 49        | Tuluq C1                    | 11,160                             | 20  | 5          | 13,157         | 13,072 | 13,096              | North Alaska       | 110                               |
| 50        | Putu                        | 10,490                             | 70  | 1          | 12,688         | 12,099 | 12,487              | North Alaska       | 111                               |
| 51        | Raven Bluff                 | 10,280                             | 30  | 7          | 12,432         | 11,829 | 11,991              | North Alaska       | 112                               |
| 52        | Serpentine Hot Springs      | 10,150                             | 30  | 3          | 11,935         | 11,644 | 11,788              | North Alaska       | 113                               |
| 53        | HAR-006                     | 10,140                             | 90  | 1          | 12,421         | 11,316 | 11,739              | North Alaska       | 114                               |
| 54        | Irwin Sluiceway             | 10,050                             | 50  | 2          | 11,813         | 11,330 | 11,564              | North Alaska       | 115                               |
| 55        | Mesa                        | 10,000                             | 80* |            | 12,478         | 11,769 | 12,110              | North Alaska       | 116                               |

| Intcal ID | Site/Component               | Radiocarbon age                    |     |            | Calibrated age |        |                     | Area              | Reference in Potter et al. (2018) |
|-----------|------------------------------|------------------------------------|-----|------------|----------------|--------|---------------------|-------------------|-----------------------------------|
|           |                              | <sup>14</sup> C yr BP <sup>1</sup> | ±   | n of dates | From           | To     | Median cal years BP |                   |                                   |
| 56        | Nat Pass                     | 9,960                              | 30  | 2          | 11,609         | 11,260 | 11,364              | North Alaska      | 117                               |
| 57        | NR-5                         | 9,570                              | 60  | 2          | 11,158         | 10,709 | 10,928              | North Alaska      | 118                               |
| 58        | Onion Portage Akmak          | 9,570                              | 150 | 1          | 11,252         | 10,440 | 10,900              | North Alaska      | 119                               |
| 59        | Calvert Island (EjTa-4)      | 11,140                             | 25  | 1          | 13,156         | 12,991 | 13,087              | NW Coast          | 39                                |
| 60        | Calvert Island (EjTa-4)      | 10,720                             | 60  | 5          | 12,760         | 12,620 | 12,714              | NW Coast          | 39                                |
| 61        | Calvert Island (EjTa-4)      | 10,625                             | 20  | 1          | 12,712         | 12,618 | 12,671              | NW Coast          | 39                                |
| 62        | K1 Cave                      | 10,960                             | 80* |            | 13,070         | 12,755 | 12,886              | NW Coast          | 120                               |
| 63        | Gaadu Din 1 Cave             | 10,620                             | 80* | 6          | 12,745         | 12,475 | 12,638              | NW Coast          | 121                               |
| 64        | Gaadu Din 2 Cave             | 10,530                             | 80* | 12         | 12,724         | 12,102 | 12,534              | NW Coast          | 122                               |
| 65        | Cardinalis Creek             | 10,370                             | 80* |            | 12,605         | 11,890 | 12,234              | NW Coast          | 123                               |
| 66        | On-Your-Knees Cave           | 10,300                             | 50  | 1          | 12,478         | 11,769 | 12,110              | NW Coast          | 124                               |
| 67        | Hunter Island                | 9,940                              | 50  | 1          | 11,683         | 11,238 | 11,361              | NW Coast          | 125                               |
| 68        | Namu                         | 9,700                              | 80* |            | 11,247         | 10,773 | 11,086              | NW Coast          | 126                               |
| 69        | Kilgii Gwaay                 | 8,540                              | 80* | 12         | 11,165         | 10,595 | 10,886              | NW Coast          | 121                               |
| 70        | Hidden Falls                 | 9,500                              | 80* |            | 11,141         | 10,571 | 10,811              | NW Coast          | 127-128                           |
| 71        | Arrow Creek 2                | 9,500                              | 80* |            | 11,141         | 10,571 | 10,811              | NW Coast          | 129                               |
| 72        | Ground Hog Bay               | 9,200                              | 70  | 2          | 10,561         | 10,235 | 10,370              | NW Coast          | 130                               |
| 73        | Richardson Island            | 9,290                              | 80* | 8          | 10,680         | 10,250 | 10,468              | NW Coast          | 131                               |
| 74        | Irish Creek                  | 9,280                              | 40  |            | 10,578         | 10,295 | 10,459              | NW Coast          | 132                               |
| 75        | Neck Creek                   | 9,260                              | 30  |            | 10,565         | 10,291 | 10,437              | NW Coast          | 133                               |
| 76        | Trout Creek                  | 9,130                              | 40  |            | 10,482         | 10,220 | 10,281              | NW Coast          | 132                               |
| 77        | Rice Creek                   | 9,090                              | 50  |            | 10,406         | 10,181 | 10,243              | NW Coast          | 132                               |
| 78        | Arrow Creek 1                | 8,800                              | 80* |            | 10,155         | 9,556  | 9,845               | NW Coast          | 129                               |
| 79        | Wally's Beach                | 11,210                             | 40  | 4          | 13,175         | 13,085 | 13,128              | Ice Free Corridor | 53                                |
| 80        | Vermilion Lakes Loc A, C9b   | 10,770                             | 180 | 3          | 13,104         | 12,103 | 12,737              | Ice Free Corridor | 134                               |
| 81        | Lake Minnewanka              | 10,800                             | 80* |            | 12,905         | 12,625 | 12,757              | Ice Free Corridor | 135                               |
| 82        | Charlie Lake Cave            | 10,470                             | 50  | 3          | 12,659         | 12,102 | 12,477              | Ice Free Corridor | 137                               |
| 83        | Vermilion Lakes Loc A, C9a   | 10,300                             | 60  | 4          | 12,465         | 11,829 | 12,092              | Ice Free Corridor | 134                               |
| 84        | Vermilion Lakes Loc A, C6b   | 10,200                             | 110 | 2          | 12,466         | 11,399 | 11,881              | Ice Free Corridor | 134                               |
| 85        | Twin Pines Layer 2           | 10,140                             | 80  |            | 12,042         | 11,340 | 11,742              | Ice Free Corridor | 138                               |
| 86        | Vermilion Lakes Loc B, C4    | 9,910                              | 100 | 3          | 11,801         | 11,179 | 11,388              | Ice Free Corridor | 134                               |
| 87        | Lindoe (EaOp9)               | 9,900                              | 120 |            | 11,824         | 10,904 | 11,391              | Ice Free Corridor | 139                               |
| 88        | Twin Pines Layer 3           | 9,750                              | 80  |            | 11,388         | 10,784 | 11,161              | Ice Free Corridor | 138                               |
| 89        | Vermilion Lakes Loc A, C6a   | 9,640                              | 100 | 2          | 11,232         | 10,706 | 10,965              | Ice Free Corridor | 135                               |
| 90        | Gap site (DIPo20)            | 9,600                              | 240 |            | 11,690         | 10,253 | 10,937              | Ice Free Corridor | 140                               |
| 91        | J-Crossing (DjPm-16)         | 9,600                              | 80* |            | 11,190         | 10,707 | 10,942              | Ice Free Corridor | 141                               |
| 92        | Saskatoon Mountain, Level 11 | 9,380                              | 360 | 1          | 11,805         | 9,605  | 10,682              | Ice Free Corridor | 138                               |

<sup>1</sup>Oldest date from site selected.

\*<sup>14</sup>C date with error range not supplied; used median age with ± 80 for calibration using Oxcal v.4.4.2<sup>31</sup> and the IntCal20 calibration curve<sup>32</sup>.

## 2. Supplementary Methods and Results

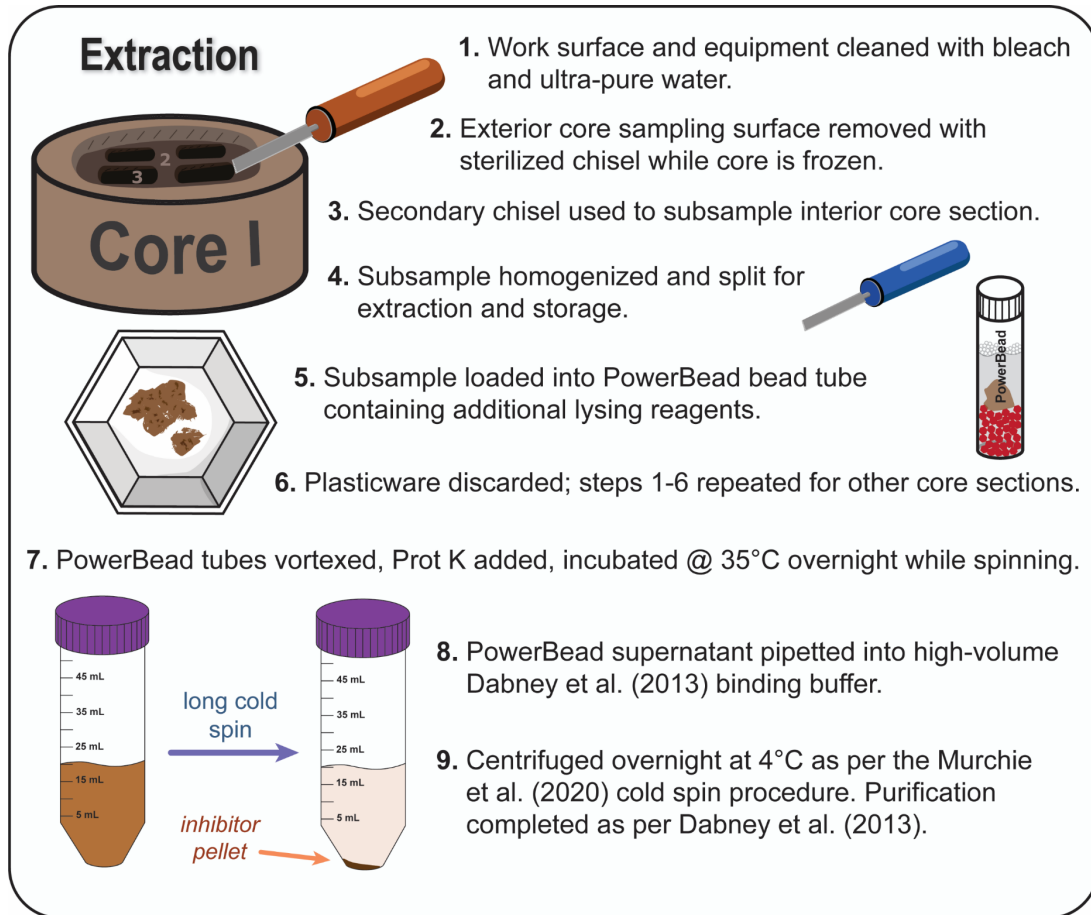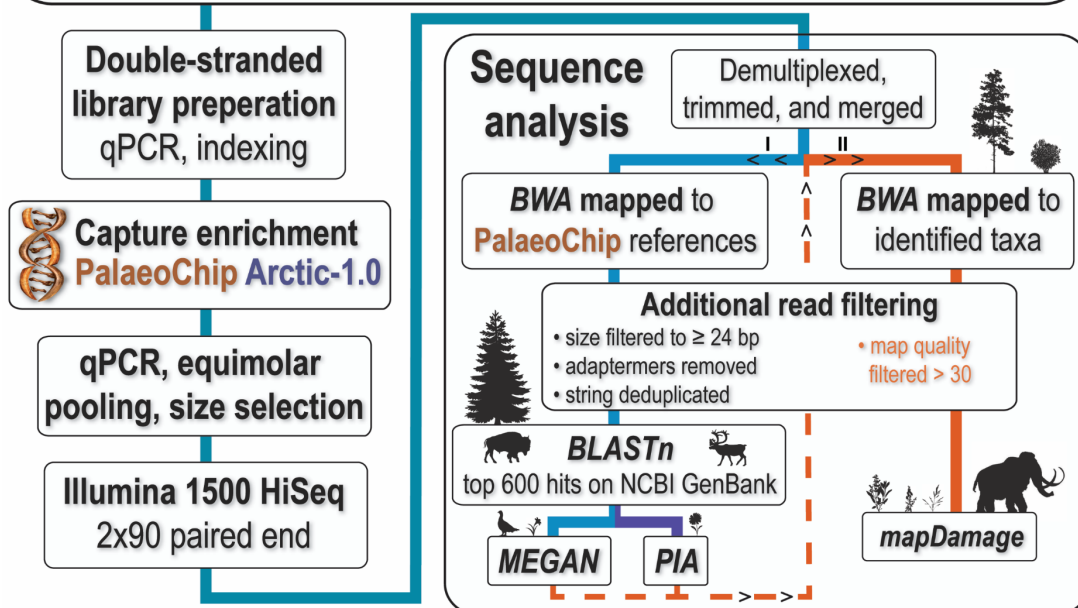

**Supplementary Figure 4** Workflow schematic from wet-lab procedures (extraction through sequencing) to *in silico* data analysis.

## 2.1 Site descriptions

**Bear Creek** (n=1). The Bear Creek site is located 11 km east of Dawson City, Yukon, in the Klondike placer mining district. Mining activities had exposed a ~10 m vertical surface consisting of 3 m of alluvial sediment overlain by 7 m of ice-rich loessal silt<sup>33</sup>. The Dawson tephra is prominent at the site, dating to 25,300 <sup>14</sup>C yr BP ( $\geq 30,000$  cal BP)<sup>34</sup>, and is situated between 5.2 and 6 m from the base of the exposure. Horizontal core sample BC 4-2B was collected 50 cm below the tephra under a stratified lens of ice, likely the remnant of a surface icing similar to other sites associated with Dawson tephra in the area (Froese et al., 2006). The singular core sample used in this analysis from Bear Creek (BC 4-2B) was collected from reddish-brown ice-poor silts that extend below the tephra. These sediments are interpreted as the palaeosurface and include the palaeo-active layer that existed at the time of Dawson tephra deposition. This unit was preserved due to the rapid deposition of the tephra (~80 cm thick at this site) that shifted the active layer upward. Observations of the palaeoactive layer and preservation of the ice body indicate that there was no thawing or water migration in these relict permafrost sediments following deposition of the Dawson tephra<sup>33</sup>.

**Upper Goldbottom** (n=7). This site is located 28 km southeast of Dawson along Goldbottom Creek, a tributary of Hunker Creek and the Klondike River. The 28.5 m exposure was divided by Mahony<sup>35</sup> into five units, dating roughly between 46 ka cal BP near the base, to 6 ka cal BP near the surface. The lowermost unit (0–12.6 m, Unit 1—not represented in this sedaDNA dataset) consists of grey and brown silts with lenses of rust-brown sandy gravel, in addition to *in situ* macrofossils of graminoid vegetation and infrequent wood and shrub remains, as well as *in situ* bones of large mammals, mainly bison and mammoth. This unit is estimated to have been deposited between 43,985 and 35,895 cal BP<sup>35</sup>.

Unit 2 (12.6–18.0 m, 32,385–29,400 cal BP) is also not represented in this sample set, but includes brown and grey silts, *in situ* macrofossils in sandy gravel lenses, large ice wedges, and the Dawson tephra (10 cm thick) at 17.7 m<sup>35</sup>.

Unit 3 (18.0–22.5 m) consists of grey silts with *in situ* graminoid macrofossils and a few lenses of thin gravels. Four arctic ground squirrel nests were recovered dating between 25,285 to 20,375 cal BP (20,960  $\pm$  150, UCIAMS-131095; 16,895  $\pm$  45, UCIAMS-114712)<sup>35</sup>. The three permafrost samples

from Unit 3 used in this analysis were originally dated to 21,775 cal BP (MM12-117B), 21,000 cal BP (MM12-116B), and 18,510 cal BP (MM12-115B)<sup>35</sup>.

Unit 4 (22.5–26.5 m) consist of black and grey organic rich silts with thin (5–15 cm) interbedded lenses of gravels and sand, as well as components of green-grey silts and interbedded humified brown organic silts. *In situ* graminoid and shrub macrofossils were also identified. Unit 4 is estimated to have begun deposition ca. 10,600 cal BP (9,395 ± 25, UCIAMS-114910)<sup>35</sup>. Aggradation rates could not be assessed at the time by Mahony as radiocarbon dated samples were laterally-offset. Core samples MM12-118B and -119B were originally dated to 9,685 and 10,340 cal BP respectively<sup>35</sup>.

**Upper Quartz** (n=7). The Upper Quartz site is located 33 km southeast of Dawson in the narrow valley of Quartz Creek, a tributary to the Indian River. Mahony<sup>35</sup> divided the 7 m vertical section into three units. The lowermost unit (0–2.8 m) consists of grey and brown silts with several thin (1–3 cm) discontinuous black organic lenses in the upper ~1 m with abundant *in situ* macrofossils of graminoid vegetation and rare detrital woody macrofossils. Mahony's calibrated radiocarbon dates from this unit indicated a deposition between 16,560–13,510 cal BP (13,680 ± 390, UCIAMS-114710; 11,680 ± 35, UCIAMS-131100). Two arctic ground squirrel nests were identified at 0 and 0.75 m from the base in this unit, with <sup>14</sup>C dates of 16,270 and 15,740 cal BP respectively (13,510 ± 45, UCIAMS-131096; 13,110 ± 35, UCIAMS-142195). Aggradation rates for this unit were estimated by Mahony<sup>35</sup> to range from 0.06–0.14 cm/year. Permafrost cores MM12-QC-2, -3, and -4 were sampled from this unit, and were originally dated to 16,560 cal BP (13,680 ± 390, UCIAMS-114710), 15,745 cal BP, and 14,925 cal BP respectively<sup>35</sup>.

The second unit (2.8–3.8 m) consists of grey and black silts, a laterally continuous black organic rich layer with *in situ* macrofossils of shrubby roots and graminoid vegetation. The unit also contains several aggregational ice lenses (2 cm thick), one syngenetic ice wedge, and abundant non-parallel, wavy microlenticular cryostructures<sup>35</sup>. Shrub macrofossils had date ranges between 13,685 and 13,160 cal BP (11,885±35, UCIAMS-142206; 11,315±35, UCIAMS-142205), although aggradation rates could not be estimated. Core MM12-QC-6 was sampled from this unit, and was <sup>14</sup>C dated to 12,805 cal BP (10,960 ± 35, UCIAMS-114733).



The uppermost unit (3.7–7.0 m), consists of organic-rich black and grey silts, interbedded discontinuous diamict and sand lenses (10–15 cm thick) with *in situ* macrofossils of fibrous organics and wood. Cryostructures are generally non-parallel wavy lenticular (2–6 mm) with microlenticular ice, crustal ice, and a syngenetic ice wedge (~50 cm wide). Aggradation rates were estimated at 2.0 cm/year<sup>35</sup>. Radiocarbon samples had dates ranging from 5,925 to 5,165 cal BP (5,160 ± 20, UCIAMS-114899; 4,520 ± 25, UCIAMS-142207). Permafrost cores MM12-QC-8, -9, and -10 were sampled from this unit, and were originally dated to 5,915, 5,840, and 5,765 cal BP<sup>35</sup>. The youngest core has been found to be much younger with redating (Supplementary section 2.2), with a new median age of 3849 cal BP.

**Lucky Lady II** (n=8). The Lucky Lady II site is located 46 km southeast of Dawson along the Sulphur Creek tributary of the Indian River. Core samples from this site were previously analyzed by both Mahony<sup>35</sup> and Sadoway<sup>36</sup>, with Sadoway using PCR metabarcoding and targeted enrichment techniques.

An 11.5 m section of the Lady Lady II permafrost exposure was sampled by Mahony<sup>35</sup>, which was divided into two units; five vertical cores were taken at the site for high-resolution isotopic and radiocarbon analyses. The lowermost unit (0–3.5 m) unit consists of grey silts with a thick black-organic rich horizon (palaeosol) at 2.7 m from the base dating from 13,410 to 13,140 cal BP (11,580 ± 35 <sup>14</sup>C yr BP, UCIAMS-143308; 11,290 ± 160 <sup>14</sup>C yr BP, UCIAMS-56390) with several thinner palaeosol horizons above. The unit includes *in situ* graminoid macrofossils and multiple arctic ground squirrel nests; several horse and bison bones were also identified. The unit is suggestive of a steppe-tundra landscape, which is estimated to have been deposited from ca. 16,500 to 13,140 cal BP (13,680 ± 35 <sup>14</sup>C yr BP, UCIAMS-51324 to 11,290 ± 160 <sup>14</sup>C yr BP, UCIAMS-56390), with an aggradation rate of 0.12–0.62 cm/year<sup>35</sup> and with deep active layers. Samples PHP-4 through PHP-9 were recovered from this unit, dating between 15,865 and 13,105 (11,250 ± 20 <sup>14</sup>C BP) cal BP<sup>36</sup>.

The uppermost unit (3.5–11.5 m) consists of organic-rich grey and black silts with more organic-rich sediments towards the top of the unit exposure. Several black organic-rich horizons (2–6 cm thick) are interspersed throughout the unit. The defining contact between the upper and lower units at Lucky Lady II is the appearance of shrub vegetation macrofossils in the uppermost unit. This upper unit contains abundant *in situ* shrub and graminoid macrofossils, but no *in situ* animal remains were

identified. The unit is considered to have been deposited between 13,150 and 8,525 cal BP (11,300 ± 35, UCIAMS-142197; 7,750 ± 25, UCIAMS-143296) at an aggradation rate of ~0.12–0.19 cm/year<sup>35</sup>. This unit suggests a shift away from a steppe-tundra ecosystem towards one with an abundance of shrub vegetation. Permafrost samples PHP-2 and -3 were recovered from this unit and dated to 10,220 and 10,340 (9195 ± 20 <sup>14</sup>C BP) cal BP respectively<sup>36</sup>.

## 2.2 Bayesian age-depth modelling figures and tables

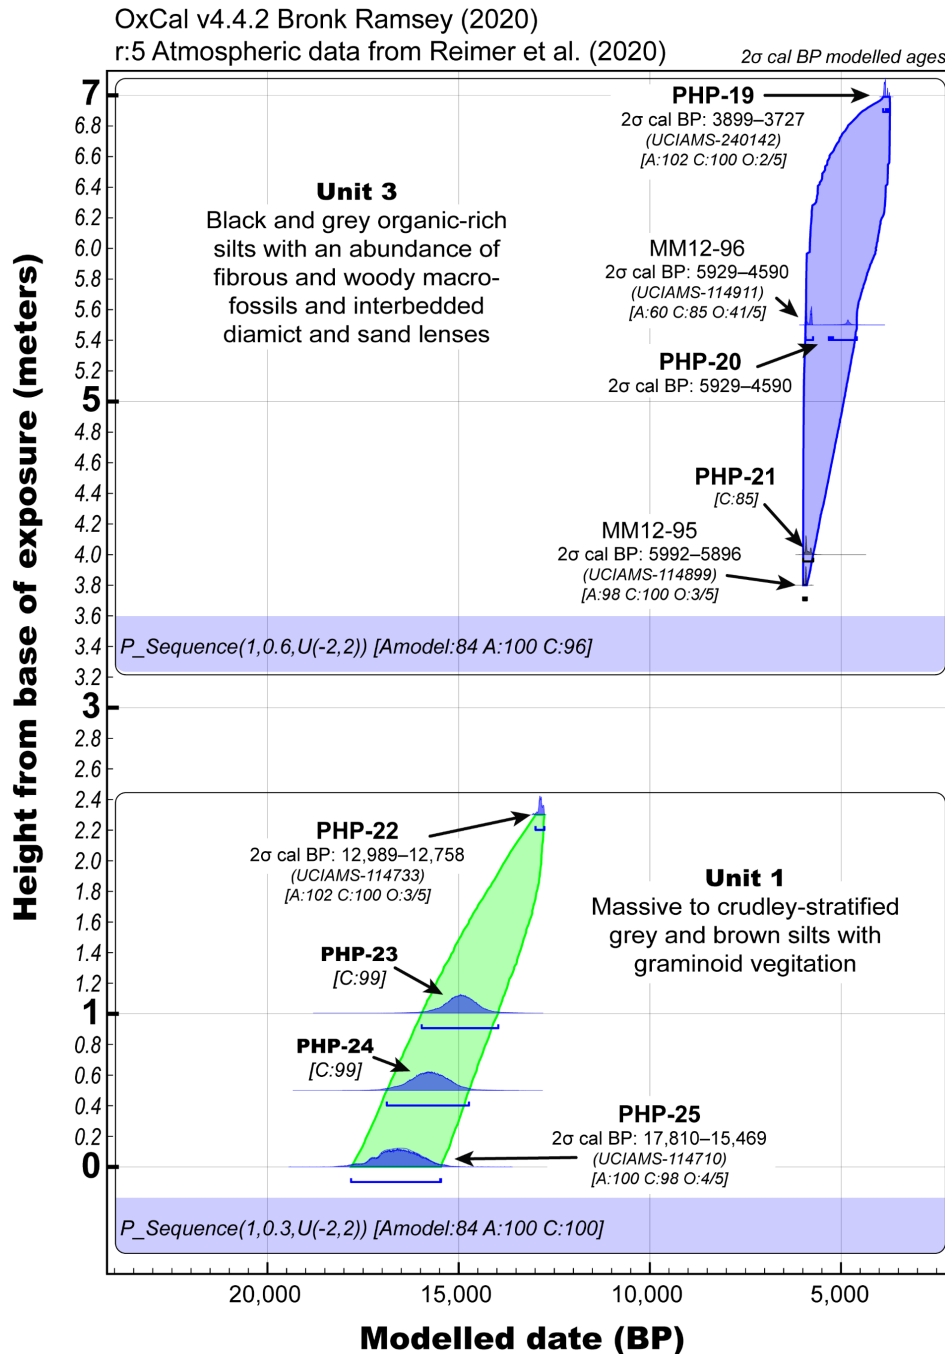

**Supplementary Figure 5**  
 Upper Quartz permafrost exposure; age model for horizontal cores collected in 2012.

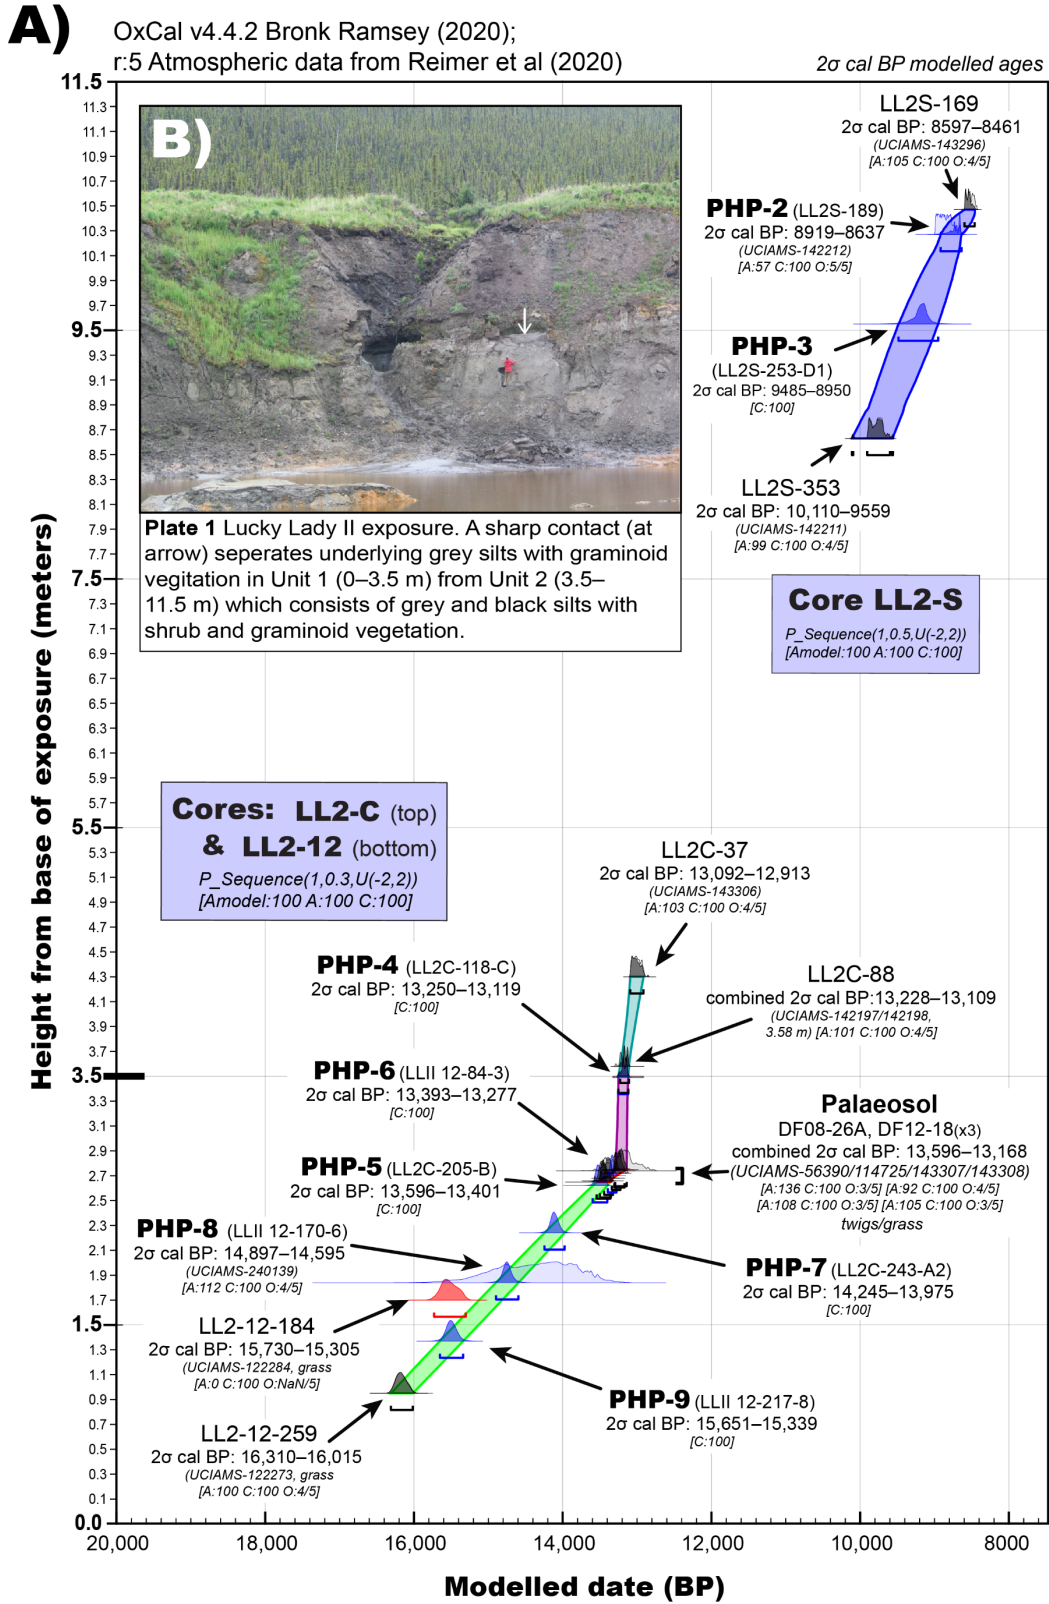

**Supplementary Figure 6** Lucky Lady II permafrost exposure. A) Age model for three vertical cores collected at the site. B) Plate from Mahony<sup>35</sup>.



**Supplementary Table 3** Permafrost cores and radiocarbon dates used in Bayesian age-depth modelling

| Site & exposure height     | Core ID <sup>1</sup> | Height from base (m) | SedaDNA ID    | <sup>14</sup> C Lab ID | <sup>14</sup> C age |        | Calibrated age (cal yr BP) |        |        | Modelled age (cal yr BP) |        |        | Low mass samples (mgC) | Material                            | Notes                 |                            |
|----------------------------|----------------------|----------------------|---------------|------------------------|---------------------|--------|----------------------------|--------|--------|--------------------------|--------|--------|------------------------|-------------------------------------|-----------------------|----------------------------|
|                            |                      |                      |               |                        | Median              | ±      | From                       | To     | Median | From                     | To     | Median |                        |                                     |                       |                            |
| Upper Goldbottom<br>28.5 m | MM12-39              | 26.6                 |               | UCIAMS-114898          | 5,185               | 20     | 5,994                      | 5,907  | 5,938  | 5,994                    | 5,906  | 5,937  |                        | wood                                |                       |                            |
|                            | MM12-124             | 24.6                 |               | UCIAMS-114910          | 9,395               | 25     | 10,700                     | 10,515 | 10,626 | -                        | -      | -      |                        | wood                                | Outlier               |                            |
|                            | MM12-118b            | 23.4                 | PHP-11        |                        |                     |        |                            |        |        | 9,869                    | 8,604  | 9,246  |                        |                                     |                       |                            |
|                            | MM12-121             | 22.85                |               | UCIAMS-114906          | 8,965               | 25     | 10,227                     | 9,921  | 10,166 | -                        | -      | -      |                        | wood                                | Outlier               |                            |
|                            | MM12-119B            | 22.6                 | PHP-12        |                        | UCIAMS-240143       | 8,905  | 25                         | 10,178 | 9,908  | 10,036                   | 10,181 | 9,909  | 10,051                 |                                     | twig                  |                            |
|                            | MM12-115b            | 22.3                 | PHP-14        |                        |                     |        |                            |        |        | 20,320                   | 19,070 | 19,704 |                        |                                     |                       |                            |
|                            | MM12-112             | 22.2                 |               | UCIAMS-122282          | 15,570              | 50     | 18,940                     | 18,770 | 18,852 | 18,943                   | 18,764 | 18,850 |                        | AGSN <sup>2</sup> , FP <sup>3</sup> | adj 23.0 <sup>4</sup> |                            |
|                            | MM12-116b            | 21.4                 | PHP-13        |                        | UCIAMS-240140       | 17,230 | 80                         | 20,952 | 20,556 | 20,786                   | 20,955 | 20,554 | 20,787                 | 0.200                               | twig                  |                            |
|                            | MM12-117b            | 21.15                | PHP-15        |                        | UCIAMS-240141       | 26,420 | 1,920                      | 36,870 | 27,275 | 31,228                   | 22,424 | 20,568 | 21,232                 | 0.029                               | twig                  | <sup>14</sup> C an outlier |
|                            | MM12-113             | 20.9                 |               | UCIAMS-114712          | 16,895              | 45     | 20,530                     | 20,294 | 20,425 | 20,538                   | 20,294 | 20,430 |                        | AGSN                                | adj 21.7              |                            |
|                            | MM12-134             | 12.6                 |               | UCIAMS-114714          | 32,000              | 320    | 37,058                     | 35,620 | 36,367 | 37,036                   | 35,653 | 36,363 |                        | AGSN                                | adj 13.4              |                            |
|                            | MM12-132b            | 9.9                  |               |                        |                     |        |                            |        |        | 41,947                   | 39,394 | 40,703 |                        |                                     |                       |                            |
|                            | MM12-125             | 8.5                  |               | UCIAMS-142208          | 37,770              | 660    | 42,773                     | 41,379 | 42,159 | 42,617                   | 41,421 | 42,123 |                        | wood                                |                       |                            |
| MM12-129                   | 6.7                  |                      | UCIAMS-114716 | 40,270                 | 770                 | 44,620 | 42,580                     | 43,562 | 44,532 | 42,815                   | 43,715 |        | wood                   |                                     |                       |                            |
| DF12-24                    | 5.7                  |                      | UCIAMS-122274 | 42,070                 | 980                 | 46,771 | 43,155                     | 44,909 | 45,962 | 43,406                   | 44,769 |        | wood                   |                                     |                       |                            |
| Upper Quartz<br>7 m        | MM12-QC-10           | 7                    | PHP-19        | UCIAMS-240142          | 3,550               | 15     | 3,896                      | 3,727  | 3,847  | 3,899                    | 3,727  | 3,849  |                        | twig                                |                       |                            |
|                            | MM12-96              | 5.5                  |               | UCIAMS-114911          | 5,115               | 25     | 5,926                      | 5,753  | 5,814  | 5,929                    | 4,590  | 5,776  |                        | wood                                |                       |                            |
|                            | MM12-QC-9            | 5.5                  | PHP-20        |                        |                     |        |                            |        |        | 5,929                    | 4,590  | 5,776  |                        |                                     |                       |                            |
|                            | MM12-QC-8            | 4                    | PHP-21        |                        |                     |        |                            |        |        | 5,992                    | 5,744  | 5,909  |                        |                                     |                       |                            |
|                            | MM12-95              | 3.8                  |               | UCIAMS-114899          | 5,160               | 20     | 5,989                      | 5,897  | 5,921  | 5,992                    | 5,896  | 5,923  |                        | wood                                |                       |                            |
|                            | MM12-QC-06           | 2.3                  | PHP-22        |                        | UCIAMS-114733       | 10,960 | 35                         | 12,990 | 12,758 | 12,860                   | 12,989 | 12,758 | 12,860                 | 0.190                               | grass                 |                            |
|                            | MM12-QC-4            | 1                    | PHP-23        |                        |                     |        |                            |        |        | 15,958                   | 13,988 | 14,939 |                        |                                     |                       |                            |
|                            | MM12-QC-3            | 0.5                  | PHP-24        |                        |                     |        |                            |        |        | 16,862                   | 14,720 | 15,759 |                        |                                     |                       |                            |
| MM12-QC-02                 | 0                    | PHP-25               |               | UCIAMS-114710          | 13,680              | 390    | 17,785                     | 15,499 | 16,565 | 17,810                   | 15,469 | 16,563 | 0.021                  | grass                               |                       |                            |
| Lucky Lady II<br>11.5 m    | LL2S-169             | 10.47                |               | UCIAMS-143296          | 7,750               | 25     | 8,593                      | 8,448  | 8,524  | 8,597                    | 8,461  | 8,545  |                        | twigs                               |                       |                            |
|                            | LL2S-189             | 10.27                | PHP-2         |                        | UCIAMS-142212       | 7,975  | 25                         | 8,993  | 8,652  | 8,862                    | 8,919  | 8,637  | 8,707                  |                                     | needle/<br>leaves     |                            |
|                            | LL2S-253-D1          | 9.55                 | PHP-3         |                        |                     |        |                            |        |        | 9,485                    | 8,950  | 9,177  |                        |                                     |                       |                            |
|                            | LL2S-353             | 8.63                 |               | UCIAMS-142211          | 8,770               | 30     | 9,903                      | 9,560  | 9,767  | 10,110                   | 9,559  | 9,776  |                        | leaves/twigs                        |                       |                            |
|                            | LL2C-37              | 4.3                  |               | UCIAMS-143306          | 11,070              | 30     | 13,090                     | 12,909 | 13,006 | 13,092                   | 12,913 | 13,015 |                        | twigs/grass                         |                       |                            |
|                            | LL2C-88(2)           | 3.58                 |               | UCIAMS-142198          | 11,290              | 40     | 13,295                     | 13,100 | 13,176 | 13,228                   | 13,109 | 13,160 |                        | shrub/twigs                         |                       |                            |
|                            | LL2C-88              | 3.58                 |               | UCIAMS-142197          | 11,300              | 35     | 13,297                     | 13,111 | 13,187 | 13,228                   | 13,109 | 13,160 |                        | shrub/twigs                         |                       |                            |
|                            | LL2C-118-C           | 3.49                 | PHP-4         |                        |                     |        |                            |        |        | 13,250                   | 13,119 | 13,176 |                        |                                     |                       |                            |
|                            | DF08-26A             | 2.7                  |               | UCIAMS-56390           | 11,290              | 160    | 13,486                     | 12,843 | 13,194 | 13,307                   | 13,168 | 13,241 | 0.052                  | twigs/grass                         | palaeosol             |                            |
|                            | DF12-18              | 2.7                  |               | UCIAMS-114725          | 11,360              | 40     | 13,314                     | 13,166 | 13,238 | 13,339                   | 13,225 | 13,288 | 0.160                  | twigs/grass                         | palaeosol             |                            |
|                            | DF12-18              | 2.7                  |               | UCIAMS-143307          | 11,535              | 35     | 13,475                     | 13,318 | 13,401 | 13,443                   | 13,324 | 13,386 |                        | twigs/grass                         | palaeosol             |                            |
|                            | DF12-18              | 2.7                  |               | UCIAMS-143308          | 11,580              | 35     | 13,571                     | 13,345 | 13,446 | 13,499                   | 13,353 | 13,438 |                        | twigs/grass                         | palaeosol             |                            |
|                            | LLII 12-84-3         | 2.7                  | PHP-6         |                        |                     |        |                            |        |        | 13,393                   | 13,277 | 13,335 |                        |                                     | palaeosol             |                            |
|                            | LL2C-205-B           | 2.62                 | PHP-5         |                        |                     |        |                            |        |        | 13,596                   | 13,401 | 13,510 |                        |                                     |                       |                            |
|                            | LL2C-243-A2          | 2.24                 | PHP-7         |                        |                     |        |                            |        |        | 14,245                   | 13,975 | 14,113 |                        |                                     |                       |                            |
|                            | LL2-12-170-6         | 1.84                 | PHP-8         |                        | UCIAMS-240139       | 12,200 | 340                        | 15,389 | 13,449 | 14,337                   | 14,897 | 14,595 | 14,750                 | 0.250                               | twig                  |                            |
| LL2-12-184                 | 1.7                  |                      | UCIAMS-122284 | 12,980                 | 60                  | 15,727 | 15,307                     | 15,531 | 15,730 | 15,305                   | 15,532 | 0.190  | grass                  |                                     |                       |                            |
| LLII 12-217-8              | 1.37                 | PHP-9                |               |                        |                     |        |                            |        | 15,651 | 15,339                   | 15,500 |        |                        |                                     |                       |                            |
| LL2-12-259                 | 0.95                 |                      | UCIAMS-122273 | 13,430                 | 35                  | 16,310 | 16,030                     | 16,178 | 16,310 | 16,015                   | 16,171 |        | grass                  |                                     |                       |                            |

<sup>1</sup>As per Mahony<sup>35</sup>. <sup>2</sup>AGSN: Arctic ground squirrel nest. <sup>3</sup>FP: fecal pellets. <sup>4</sup>AGSN height adjustment.

### 2.3 Palynology

Samples were processed and analysed for palynomorphs and non-pollen palynomorphs (NPP) at the University of Alberta. Palynological methods followed slightly modified procedures of Faegri et al.<sup>37</sup> with the addition of high-density separation. Each 4 cm<sup>3</sup> sample was spiked with a *Lycopodium clavatum* spore tablets of known quantity (Batch Number: 483216 [Sep. 2004]; 18,582 spores per tablet  $\pm$  3,820) before processing to allow calculations of palynomorphs and NPP concentrations. Sediment was processed with 10% hydrochloric acid, 10% sodium hydroxide, high density separation with 1.9 g cm<sup>-1</sup> density sodium polytungstate (SPT), 50% hydrofluoric acid, acetolysis (10:1 acetic anhydride: concentrated sulphuric acid), dehydrated using 95% ethyl alcohol and tert-butanol and mounted in (2000 cs) silicone oil. Due to the limited presence of pollen grains throughout the samples, a minimum of 50 *L. clavatum* were counted instead of the 300 pollen grains typical of palynological analysis. This allowed calculation of palynomorph and NPP concentrations and to determine if samples are barren or near absent of pollen grains. Identifications of pollen followed McAndrews et al.<sup>38</sup> and were identified at least to family and more typically to genus. NPP identifications followed<sup>39-45</sup>. NPP taxa are also identified by their Hugo de Vries (HdV) designation where possible to enable cross study comparison<sup>46</sup>.

Samples were selected to cover the last ca. 30,000 years. Thirteen samples were counted from the Bear Creek, Upper Goldbottom and Upper Quartz sites (Supplementary Table 5). Pollen counts average at 23 grains (range 0–121.5) with 17 palynomorph taxa identified. Of the 15 samples analyzed, only PHP-19 (3849 cal BP) reached a pollen count greater than 100 grains. The remaining samples were near absent of pollen grains with PHP-22 (12,860 cal BP) and PHP-24 (15,759 cal BP) being completely barren of any palynomorphs. Holocene samples PHP-19, PHP-20 (5776 cal BP), and PHP-11 (9246 cal BP) were the only samples to preserve bisaccate pollen grains of spruce (*Picea*) and pine (*Pinus*) with the addition of a singular spruce stomata.

Non-pollen palynomorph were represented primarily by (semi-)coprophilous fungal taxa (n=315), *Sordaria* (HdV-55), an unknown ellipsoidal ascospore assigned as HdV-834 by Langeveld et al.<sup>47</sup> that likely represents the genus *Arnium*, *Sporormiella* (HdV-113), *Arnium* (HdV-261), *Cercophora* (HdV-112), *Delitschia* (no HdV designation), *Chaeotomium* (HdV-7) and *Gelasinospora* (HdV-1). Other fungi include the arbuscular mycorrhizal genus, *Glomus* (HdV-1103) and the saprophytic genus

*Byssothecium* (HdV-1030). The NPP is not limited to fungi, a singular oocyte of the neorhabodozoa, *Gyratix*, was preserved in the Holocene sample MM12-QC-10 (PHP-19) and the colonial chlorophytes *Pediastrum* (HdV-760) and *Botryococcus* (HdV-766) occurred in PHP-23 and PHP-1, respectively.

Due to the exceptional preservation and abundance of NPP from the samples, it is unclear why palynomorph concentrations are comparatively so low. There is no indication of palynomorph loss during processing given the presence of the NPP taxa and more importantly, the continued presence of *Lycopodium clavatum* tracers. If *L. clavatum* was missing from the palynological residue, we may then consider a loss of palynomorphs during heavy-density separation, but this is not the case. Similarly, we may consider taphonomic processes leading to loss of the palynomorph grains/spores, but the excellent preservation of NPP in the residue suggests this is unlikely. Further study is required to fully understand what factors may be influencing the occurrence of palynomorphs in these permafrost samples.

**Supplementary Table 4** Raw palynomorph and non-pollen palynomorph counts

| SedaDNA ID                           |               | PHP-19       | PHP-20 | PHP-21 | PHP-11 | PHP-12 | PHP-22 | PHP-23 | PHP-24 | PHP-25 | PHP-14 | PHP-13 | PHP-15 | PHP-1  |
|--------------------------------------|---------------|--------------|--------|--------|--------|--------|--------|--------|--------|--------|--------|--------|--------|--------|
| Site                                 |               | UQ           | UQ     | UQ     | UGB    | UGB    | UQ     | UQ     | UQ     | UQ     | UGB    | UGB    | UGB    | BC     |
| Median age (2σ)                      |               | 3849         | 5776   | 5909   | 9246   | 10,051 | 12,860 | 14,939 | 15,759 | 16,563 | 19,704 | 20,787 | 21,232 | 30,000 |
| Target                               | Element       |              |        |        |        |        |        |        |        |        |        |        |        |        |
|                                      |               | Palynomorphs |        |        |        |        |        |        |        |        |        |        |        |        |
| Lycopodium clavatum spike            | Spore         | 50           | 50     | 50     | 50     | 51     | 57     | 71     | 70     | 126    | 60     | 114    | 107    | 68     |
| <b>Arboreal Pollen</b>               |               |              |        |        |        |        |        |        |        |        |        |        |        |        |
| Picea                                | Pollen        | 44.5         | 6      | 13     | 50     |        |        |        |        |        |        |        |        |        |
| Picea mariana                        | Pollen        | 9            |        |        | 1      |        |        |        |        |        |        |        |        |        |
| Pinus                                | Pollen        | 2.5          | 1      | 1      |        |        |        |        |        |        |        |        |        |        |
| Salix                                | Pollen        | 0            |        |        | 1      |        |        |        |        |        |        | 2      | 2      |        |
| Betula                               | Pollen        | 1            | 1      | 1      | 3      | 22     |        |        |        | 1      |        |        | 1      |        |
| Alnus                                | Pollen        | 4            | 2      |        |        |        |        |        |        |        |        |        |        |        |
| Poaceae                              | Pollen        | 1            | 1      |        | 2      | 2      |        |        |        |        | 3      | 1      | 1      | 1      |
| Cyperaceae                           | Pollen        |              |        |        | 1      |        |        |        |        |        |        | 1      |        |        |
| Artemisia                            | Pollen        |              |        |        |        |        |        |        |        |        |        |        |        |        |
| Asteraceae cf. <i>Taraxacum</i>      | Pollen        |              |        |        | 1      |        |        |        |        |        |        | 2      | 3      |        |
| Polygonaceae                         | Pollen        |              |        |        | 1      |        |        |        |        |        | 1      |        | 1      |        |
| Chenopodium                          | Pollen        |              |        | 1      |        |        |        | 2      |        |        |        |        | 1      |        |
| Shepherdia canadensis                | Pollen        |              |        | 1      | 1      |        |        |        |        |        | 1      |        |        |        |
| Indet. Pollen                        | Pollen        | 6            |        |        |        |        |        |        |        |        | 1      | 4      | 2      | 2      |
| <b>Stomata</b>                       |               |              |        |        |        |        |        |        |        |        |        |        |        |        |
| Picea Stomate                        | Stomata       | 1            |        | 3      | 2      | 6      |        |        |        |        |        |        |        |        |
| <b>Aquatic Pollen</b>                |               |              |        |        |        |        |        |        |        |        |        |        |        |        |
| Isoetes                              | Pollen        | 1            |        |        |        | 1      |        |        |        |        |        |        |        | 1      |
| <b>Spores</b>                        |               |              |        |        |        |        |        |        |        |        |        |        |        |        |
| Sphagnum                             | Spore         | 77           | 2      |        |        | 1      |        |        |        |        |        |        |        |        |
| Dryopteris-type                      | Spore         | 1            | 3      |        |        |        |        |        |        |        |        |        |        |        |
| Trilete                              | Spore         |              |        | 4      |        |        |        |        |        |        |        |        | 1      |        |
| <b>Non-Pollen Palynomorphs (NPP)</b> |               |              |        |        |        |        |        |        |        |        |        |        |        |        |
| <b>Fungi</b>                         |               |              |        |        |        |        |        |        |        |        |        |        |        |        |
| Sordaria (HdV-55)                    | Ascospore     | 1            | 2      | 5      | 6      | 3      | 1      | 5      | 10     | 5      | 1      | 15     | 191    |        |
| Sordariales (HdV-834)                | Ascospore     |              |        |        | 4      |        |        |        |        |        |        |        | 6      |        |
| Sporormiella (HdV-113)               | Ascospore     |              |        |        |        |        |        |        |        | 4      |        | 11     | 11     |        |
| Arnium (HdV-261)                     | Ascospore     |              |        | 2      |        | 1      |        |        |        |        |        | 5      | 16     |        |
| Cercophora (HdV-112)                 | Ascospore     |              |        | 1      | 2      |        |        |        |        |        |        | 1      | 4      |        |
| Delitschia                           | Ascospore     | 1            |        |        | 3      |        |        |        |        | 1      |        |        | 1      |        |
| Gelasinospora (HdV-1)                | Ascospore     |              |        | 1      | 2      |        |        |        |        | 1      |        |        |        |        |
| Chaetomium (HdV-7)                   | Ascospore     |              |        |        | 2      |        |        |        |        |        |        |        | 2      |        |
| Bysothecium (HdV-1030)               | Ascospore     |              |        | 1      | 5      | 1      |        |        |        |        |        |        |        |        |
| Glomus (HdV-1103)                    | Chlamydospore | 1            |        |        | 9      |        | 4      | 3      |        | 3      | 1      | 7      | 21     | 38     |
| <b>Chlorophytes</b>                  |               |              |        |        |        |        |        |        |        |        |        |        |        |        |
| Pediastrum (HdV-760)                 | Colony        |              |        |        |        |        |        | 1      |        |        |        |        |        |        |
| Botryococcus (HdV-766)               | Colony        |              |        |        |        |        |        |        |        |        |        |        |        | 1      |
| <b>Other</b>                         |               |              |        |        |        |        |        |        |        |        |        |        |        |        |
| Gyratrix                             | Oocyte        | 1            |        |        |        |        |        |        |        |        |        |        |        |        |

UQ = Upper Quartz, UGB = Upper Goldbottom, BC = Bear Creek



## **2.4 Ancient DNA wet lab additional methods and results**

### **2.4.1 Pre-sequencing qPCR concentration estimates**

In the initial batch of subsamples (PHP; Supplementary Table 15) sedaDNA recovery and isolation was high, although success was somewhat inconsistent. For example, PHP-2, PHP-3, and PHP-12 had less than 1,000,000 total library adapted DNA molecules (based on a quantitative PCR [qPCR] assay prior to indexing) (Supplementary Figure 8). Generally, low pre-indexing estimates are suggestive of poor ligation success during library preparation—likely as a result of co-eluted inhibitory substances during extraction<sup>48</sup>—or poor aDNA preservation or recovery. This pattern was observed again in the post-enrichment qPCR where almost no PalaeoChip Arctic-1.0 on-target DNA could be isolated from those challenging libraries (Supplementary Figure 9), whereas most other libraries retained sufficient concentrations for pooling and sequencing. A subsequent batch of subsamples (PHP<sub>ii</sub>) with lower sediment inputs (0.15 g per PowerBead tube, duplicated for each core) improved the DNA isolation of those challenging samples, which enabled the recovery of sedaDNA from all targeted permafrost cores. These duplicated lysed extracts were combined by core following the cold spin during binding to the silica spin column in the high-volume Roche tubes.

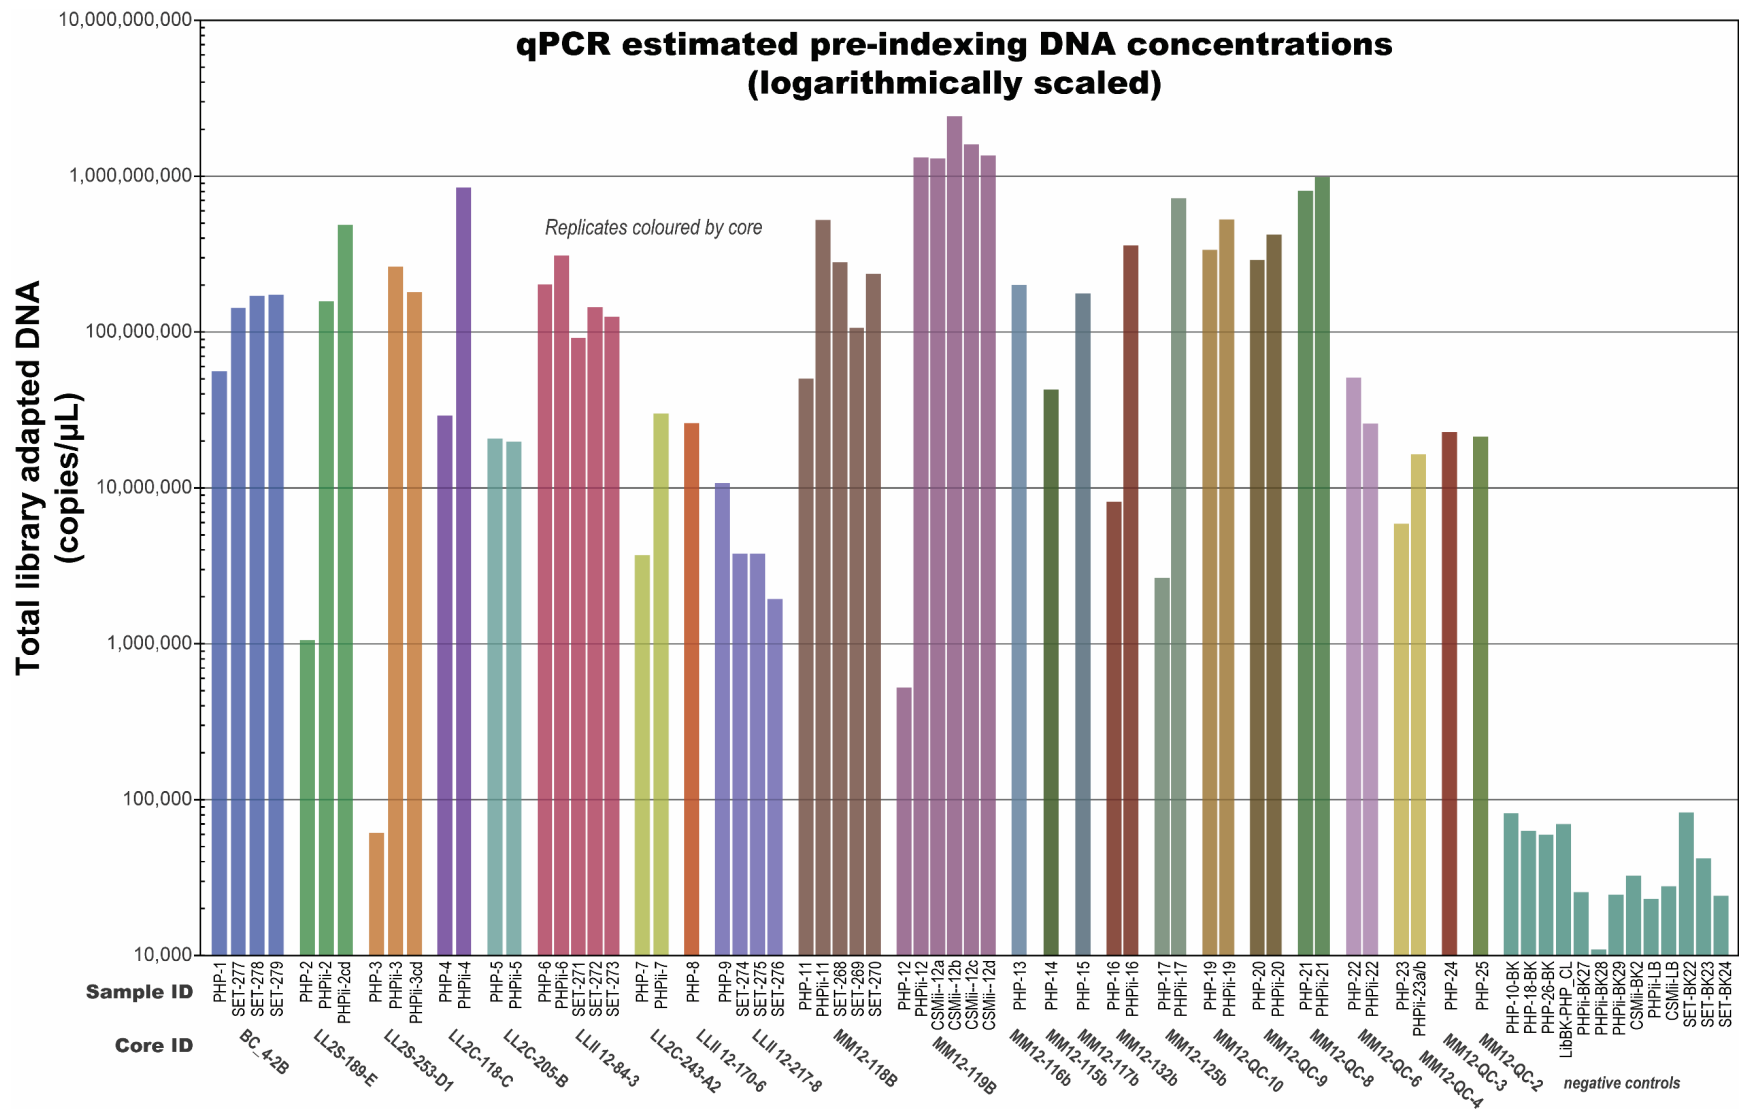

**Supplementary Figure 8** Pre-indexing short amplification qPCR assay for estimating total adapted DNA concentrations.

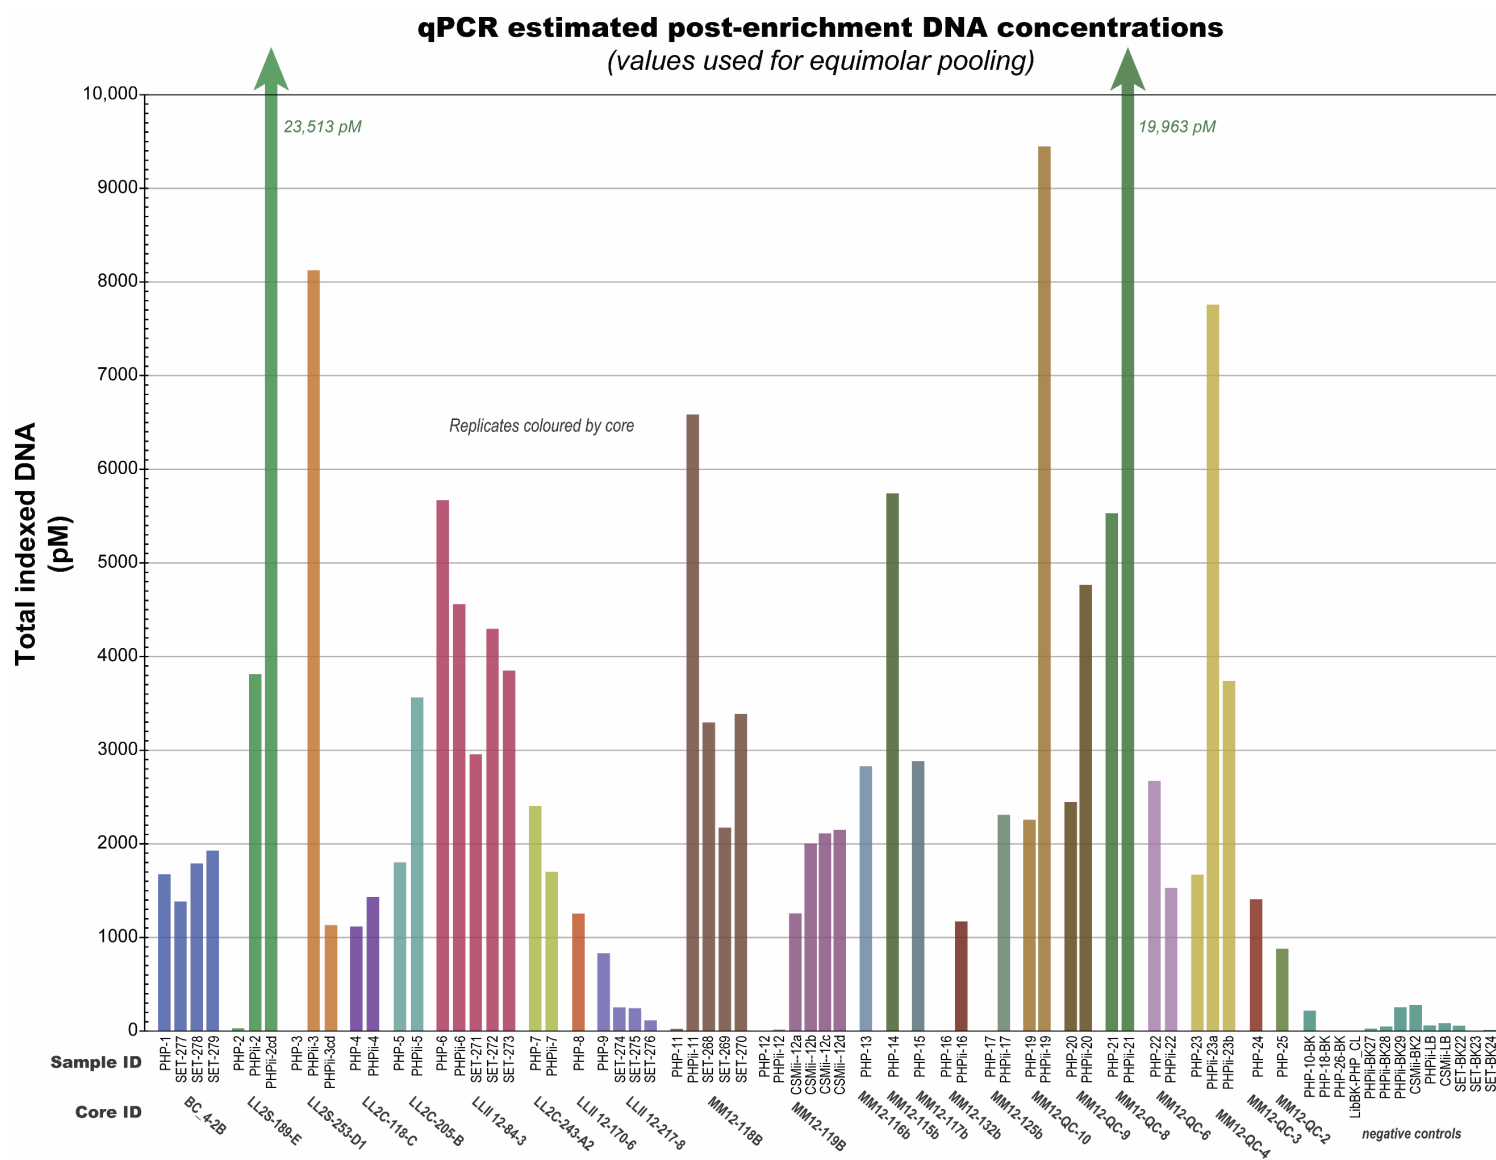

**Supplementary Figure 9** Post-enrichment long amplification qPCR assay for estimating total adapted DNA concentrations following targeted capture for equimolar pooling.

## 2.4.2 Master mix recipe tables

**Supplementary Table 5** Proteinase K digestion solution

| Proteinase K Digestion Solution |                     |
|---------------------------------|---------------------|
| Component                       | Final Concentration |
| Tris-Cl (pH 9.0)                | 0.02 M              |
| SDS                             | 0.5 %               |
| Proteinase K                    | 0.25 mg/ml          |
| CaCl <sub>2</sub>               | 0.01 M              |
| DTT                             | 100 mM              |
| PVP                             | 2.5 %               |
| PTB                             | 5 mM                |
| Volume per rxn                  | 0.5 mL              |

These are the lysis buffer concentrations after being combined with 0.75 mL of the pre-loaded PowerBead solution (garnet beads and 750  $\mu$ L 181 mM NaPO<sub>4</sub>, 121 mM guanidinium isothiocyanate). These concentrations were multiplied by 2.5x prior to loading to account for the pre-loaded PowerBead dilution. Proteinase K added individually (15.53  $\mu$ L) after vortexing for >20 minutes. Samples digested overnight at 35°C with rotation. Nanopure Barnstead water was used to bring up the volume to the desired concentration. Concentrations based on Karpinski et al.<sup>49</sup>.

**Supplementary Table 6** Guanidinium binding buffer

| Guanidinium Binding Buffer  |                     |
|-----------------------------|---------------------|
| Component                   | Final Concentration |
| Guanidine Hydrochloride     | 5 M                 |
| Isopropanol (100%)          | 40 %                |
| Tween-20                    | 0.05 %              |
| 3 M Sodium Acetate (pH 5.2) | 0.09 M              |

Nanopure Barnstead water was used to bring up the volume to the desired concentration. Concentrations based on Dabney et al.<sup>50</sup>. Utilized a ratio of 13 volumes of binding buffer to 1 volume of lysis supernatant. With a typical expected volume of 1.25 mL of lysis, 16.25 mL of binding buffer was used.

**Supplementary Table 7** Library preparation: blunt-end repair

| Blunt-End Repair Mixture      |                             |
|-------------------------------|-----------------------------|
| Component                     | Final Concentration         |
| NE Buffer 2.1                 | 1X                          |
| DTT                           | 1 mM                        |
| dNTP mix                      | 100 $\mu$ M                 |
| ATP                           | 1 mM                        |
| T4 polynucleotide kinase      | 0.5 U/ $\mu$ L              |
| T4 DNA polymerase             | 0.1 U/ $\mu$ L              |
| <b>Template (DNA extract)</b> | <b>10 <math>\mu</math>L</b> |

A final volume of 40  $\mu$ L per rxn was used for the master mix (30  $\mu$ L) and sedaDNA extract. Nanopure Barnstead water was used to bring up the volume to the desired concentration.

**Supplementary Table 8** Library preparation: adapter ligation

| 3. Adapter Ligation Mixture   |                     |
|-------------------------------|---------------------|
| Component                     | Final Concentration |
| T4 DNA Ligase Buffer          | 1X                  |
| PEG-4000                      | 5%                  |
| Adapter Mix                   | 0.5 $\mu$ M         |
| T4 DNA Ligase                 | 0.125 U/ $\mu$ l    |
| 2. Adapter Mix                |                     |
| IS1_adapter_P5.F              | 200 $\mu$ M         |
| IS2_adapter_P7.F              | 200 $\mu$ M         |
| IS3_adapter_P5+P7.R           | 200 $\mu$ M         |
| Oligo Hybridization Buffer    | 1X                  |
| 1. Oligo Hybridization Buffer |                     |
| NaCl                          | 500 mM              |
| Tris-Cl, pH 8.0               | 10 mM               |
| EDTA, pH 8.0                  | 1 mM                |

Oligo Hybridization Buffer was prepared prior to the Adapter Mix (2), which was prepared separately for IS1\_adapter\_P5.F and IS2\_adapter\_P7.F. These two mixes were then combined after an incubation at 95°C for 10 seconds, and a ramp from 95°C to 12°C at a rate of 0.1°C/sec. A final volume of 40  $\mu$ l was used for the mixture and template DNA. Nanopure Barnstead water (not listed) was used to bring the volume up to the desired concentration.

**Supplementary Table 9** Library preparation: adapter fill-in

| Adapter Fill-In Mixture            |                     |
|------------------------------------|---------------------|
| Component                          | Final Concentration |
| ThermoPol Reaction Buffer          | 1X                  |
| dNTP Mix                           | 250 $\mu$ M         |
| BST Polymerase<br>(large fragment) | 0.4 U/ $\mu$ l      |

A final volume of 40  $\mu$ l was used for the mixture and template DNA with the addition of Nanopure Barnstead water to bring the mix up to the desired concentration and volume.

**Supplementary Table 10** Indexing PCR

| Indexing PCR Master Mix             |                                                                        |                     |              |
|-------------------------------------|------------------------------------------------------------------------|---------------------|--------------|
| Component                           |                                                                        | Final Concentration |              |
| KAPA SYBR®FAST qPCR Master Mix (2X) |                                                                        | 1X                  |              |
| Forward primer                      |                                                                        | 750 nM              |              |
| Reverse primer                      |                                                                        | 750 nM              |              |
| Primer Sequences                    |                                                                        |                     |              |
| Forward Primer                      | AATGATACGGCGACCACCGAGATCTACAC <b>NNNNNNN</b> ACACTCTTTCCTACACGACGCTCTT |                     |              |
| Reverse Primer                      | CAAGCAGAAGACGGCATACGAGATTAT <b>NNNNNNN</b> ACTGGAGTTCAGACGTGT          |                     |              |
| Indexing PCR Protocol               |                                                                        |                     |              |
| Phase                               | Temperature (°C)                                                       | Time                | Cycles       |
| Initial Denaturation                | 95                                                                     | 5 min               |              |
| Denaturation                        | 95                                                                     | 20 sec              | Repeated for |
| Annealing + Extension               | *60*                                                                   | *45 sec*            | 8-12 cycles  |
| Final Extension                     | 60                                                                     | 5 min               |              |

The N in each primer sequence represents the 7 bp index specific to each primer. A final reaction volume of 40 µl was used for the assay, with 12.5 µl of the adapter ligated DNA libraries. Nanopure Barnstead water (not listed) was used to bring the volume up to the desired concentration. Fluorescence readings were recorded post-annealing as indicated above with asterisks.

**Supplementary Table 11** Pre-indexing qPCR short amplification, total quant

| PCR Master Mix                                                                                                            |                     |                                                                                                                                                           |                           |
|---------------------------------------------------------------------------------------------------------------------------|---------------------|-----------------------------------------------------------------------------------------------------------------------------------------------------------|---------------------------|
| Component                                                                                                                 |                     | Final Concentration                                                                                                                                       |                           |
| KAPA SYBR®FAST qPCR Master Mix (2X)                                                                                       |                     | 1X                                                                                                                                                        |                           |
| Forward primer                                                                                                            |                     | 0.2 μM                                                                                                                                                    |                           |
| Reverse primer                                                                                                            |                     | 0.2 μM                                                                                                                                                    |                           |
| Oligos                                                                                                                    |                     | Sequence (5'–3')                                                                                                                                          |                           |
| Forward primer<br>(ILPr_shortampP5F_MeyerIS7)                                                                             |                     | ACACTCTTCCCTACACGAC                                                                                                                                       |                           |
| Reverse primer<br>(ILPr_shortampP7R_MeyerIS8)                                                                             |                     | GTGACTGGAGTTCAGACGTGT                                                                                                                                     |                           |
| Library adapted oligo based on the mammoth<br>12S mitochondrial gene<br>(Priming sites with reverse-complement<br>bolded) |                     | <b>ACACTCTTCCCTACACGAC</b> GCTCT<br>TCCGATCTCCCTAACTTTGATAGC<br>TACCTTTACAAAGCTATCCGCCAGA<br>GAACTACAGATCGGAAGAG <b>CACA</b><br><b>CGTCTGAACTCCAGTCAC</b> |                           |
| Input                                                                                                                     |                     | Volume                                                                                                                                                    |                           |
| PCR master mix                                                                                                            |                     | 6 μL                                                                                                                                                      |                           |
| Library adapted template                                                                                                  |                     | 4 μL                                                                                                                                                      |                           |
| PCR Protocol                                                                                                              |                     |                                                                                                                                                           |                           |
| Phase                                                                                                                     | Temperature<br>(°C) | Time                                                                                                                                                      | Cycles                    |
| Initial Denaturation                                                                                                      | 95                  | 5 min                                                                                                                                                     |                           |
| Denaturation                                                                                                              | 95                  | 30 sec                                                                                                                                                    | Repeated for 30<br>cycles |
| Annealing + Extension                                                                                                     | 60                  | 45 sec                                                                                                                                                    |                           |
| Melt Curve                                                                                                                | **65–95**           | **5 sec per degree**                                                                                                                                      |                           |

Nanopure Barnstead water was used to bring the mix up to the desired concentration and volume. Oligo based on Enk et al.<sup>51</sup>; primers based Meyer and Kircher<sup>52</sup>.

**Supplementary Table 12** Enrichment master-mixes

| Hybridization MasterMix                       |                     |
|-----------------------------------------------|---------------------|
| Component                                     | Final Concentration |
| Hyb N (19.46X SSPE, 13.5 mM EDTA)             | 9X, 6.25mM          |
| Hyb D (50X Denhardt's Solution)               | 8.75X               |
| Hyb S (10% SDS)                               | 0.25 %              |
| Hyb R RNAsecure                               | 1.56X               |
| Bait Mixture (200 ng baits per reaction)      | 11.11 ng/ $\mu$ L   |
| Bait Mixture                                  |                     |
| Component                                     | Final Concentration |
| Plant: 18,672 baits                           | 83.33 ng/rxn        |
| Animal: 57,588 baits                          | 138.89 ng/rxn       |
| Library MasterMix (blocks)                    |                     |
| Component                                     | Final Concentration |
| Block A (xGens)                               | 0.04 ng/ $\mu$ L    |
| Block C (Human Cot-1 DNA)                     | 0.19 ng/ $\mu$ L    |
| Block O (Salmon Sperm DNA)                    | 0.19 ng/ $\mu$ L    |
| Library template input                        | 7 $\mu$ L           |
| Wash Buffer X (0.2X WB)                       |                     |
| Component                                     | Final Concentration |
| HYB S (10% SDS)                               | 0.08 %              |
| Wash Buffer<br>(0.1X SSC; 0.1% SDS; 1mM EDTA) | 0.2X                |

Nanopure Barnstead water was used to bring mixes up to the desired concentration and volume.



**Supplementary Table 13** Post-indexing/enrichment qPCR long amplification, total quant

| PCR Master Mix                                                  |                     |                                                                        |                           |
|-----------------------------------------------------------------|---------------------|------------------------------------------------------------------------|---------------------------|
| Component                                                       |                     | Final Concentration                                                    |                           |
| KAPA SYBR®FAST qPCR Master Mix (2X)                             |                     | 1X                                                                     |                           |
| Forward primer                                                  |                     | 0.2 µM                                                                 |                           |
| Reverse primer                                                  |                     | 0.2 µM                                                                 |                           |
| Oligos                                                          |                     | Sequence (5'–3')                                                       |                           |
| Forward primer<br>(ILPr_shortampP5F_MeyerIS5)                   |                     | AATGATACGGCGACCACCGA                                                   |                           |
| Reverse primer<br>(ILPr_shortampP7R_MeyerIS6)                   |                     | CAAGCAGAAGACGGCATACGA                                                  |                           |
| PhiX library adapted control standard from<br>100 pM to 62.6 fM |                     | AATGATACGGCGACCACCGA<br><i>ADAPTER INSERT</i><br>TCGTATGCCGTCTTCTGCTTG |                           |
| Input                                                           |                     | Volume                                                                 |                           |
| PCR master mix                                                  |                     | 6 µL                                                                   |                           |
| Library adapted and indexed template                            |                     | 4 µL                                                                   |                           |
| PCR Protocol                                                    |                     |                                                                        |                           |
| Phase                                                           | Temperature<br>(°C) | Time                                                                   | Cycles                    |
| Initial Denaturation                                            | 95                  | 5 min                                                                  | 1                         |
| Denaturation                                                    | 95                  | 30 sec                                                                 | Repeated for<br>35 cycles |
| Annealing + Extension                                           | 60                  | 45 sec                                                                 |                           |
| Cooldown                                                        | 8                   | 30 sec                                                                 | 1                         |

Nanopure Barnstead water was used to bring the mix up to the desired concentration and volume. Primers from Meyer and Kircher<sup>52</sup>.

## 2.5 Bioinformatic supplement

### 2.5.1 Full sample list with core replicates

**Supplementary Table 14** Sequencing summary and assigned reads of extraction replicates

| Site                           | Core ID       | SedaDNA ID    | Age <sup>1</sup> | Input (grams)   | Total raw reads  | PalaeoChip mapped & MEGAN assigned |                  |
|--------------------------------|---------------|---------------|------------------|-----------------|------------------|------------------------------------|------------------|
| Bear Creek <sup>33</sup>       | BC 4-2B       | PHP-1         | 30,000           | 0.25            | 1,619,859        | 58,020 (3.58%)                     |                  |
|                                |               | SET-277       |                  | 0.25            | 1,235,759        | 76,001 (6.15%)                     |                  |
|                                |               | SET-278       |                  | 0.25            | 1,275,219        | 47,127 (3.70%)                     |                  |
|                                |               | SET-279       |                  | 0.25            | 1,519,972        | 59,995 (3.95%)                     |                  |
| Lucky Lady II <sup>36</sup>    | LL2S-189-E    | PHP-2         | 8707             | 0.3             | 63,685           | 250 (0.39%)                        |                  |
|                                |               | PHPii-2       |                  | 0.3             | 4,141,976        | 8716 (0.21%)                       |                  |
|                                |               | PHPii-2cd     |                  | 0.3             | 4,461,835        | 942 (0.02%)                        |                  |
|                                | LL2S-253-D1   | PHP-3         | 9177             | 0.3             | not sequenced    |                                    |                  |
|                                |               | PHPii-3       |                  | 0.3             | 5,445,860        | 111,232 (2.04%)                    |                  |
|                                |               | PHPii-3cd     |                  | 0.3             | 3,857,668        | 380,255 (9.86%)                    |                  |
|                                | LL2C-118-C    | PHP-4         | 13,176           | 0.3             | 1,619,858        | 83,631 (5.16%)                     |                  |
|                                |               | PHPii-4       |                  | 0.3             | 6,129,319        | 95,342 (1.56%)                     |                  |
|                                | LL2C-205-B    | PHP-5         | 13,335           | 0.3             | 1,126,060        | 25222 (2.24%)                      |                  |
|                                |               | PHPii-5       |                  | 0.3             | 3,871,764        | 23004 (0.60%)                      |                  |
|                                | LLII 12-84-3  | LLII 12-84-3  | PHP-6            | 13,510          | 0.3              | 1,571,297                          | 127,515 (8.12%)  |
|                                |               |               | PHPii-6          |                 | 0.3              | 4,287,316                          | 246,751 (5.76%)  |
|                                |               |               | SET-271          |                 | 0.25             | 1,807,078                          | 150,779 (8.34%)  |
|                                |               |               | SET-272          |                 | 0.25             | 1,322,559                          | 137,744 (10.42%) |
|                                |               |               | SET-273          |                 | 0.25             | 1,247,471                          | 143,812 (11.53%) |
|                                | LL2C-243-A2   | PHP-7         | 14,113           | 0.3             | 1,449,830        | 6395 (0.44%)                       |                  |
| PHPii-7                        |               | 0.3           |                  | 4,370,642       | 48,305 (1.11%)   |                                    |                  |
| LLII 12-170-6                  | PHP-8         | 14,750        | 0.3              | 1,331,181       | 17,628 (1.33%)   |                                    |                  |
| LLII 12-217-8                  | LLII 12-217-8 | PHP-9         | 15,500           | 0.3             | 958,126          | 15,200 (1.59%)                     |                  |
|                                |               | SET-274       |                  | 0.25            | 845,348          | 10,397 (1.23%)                     |                  |
|                                |               | SET-275       |                  | 0.25            | 970,115          | 8778 (0.91%)                       |                  |
|                                |               | SET-276       |                  | 0.25            | 341,707          | 4191 (1.28%)                       |                  |
| Upper Goldbottom <sup>35</sup> | MM12-118B     | PHP-11        | 9236             | 0.3             | 79,090           | 6035 (7.63%)                       |                  |
|                                |               | PHPii-11      |                  | 0.3             | 3,221,976        | 60152 (1.87%)                      |                  |
|                                |               | SET-268       |                  | 0.25            | 1,678,166        | 182,089 (10.85%)                   |                  |
|                                |               | SET-269       |                  | 0.25            | 1,754,121        | 148,670 (8.48%)                    |                  |
|                                | MM12-119B     | SET-270       | 0.25             | 1,249,732       | 144,575 (11.57%) |                                    |                  |
|                                |               | PHP-12        | 10,626           | 0.3             | not sequenced    |                                    |                  |
|                                |               | PHPii-12      |                  | 0.3             | 61,637           | 296 (0.48%)                        |                  |
|                                |               | CSMii-PHP-12a |                  | 0.3             | 5,234,065        | 587,919 (11.23%)                   |                  |
|                                |               | CSMii-PHP-12b |                  | 0.3             | 3,464,073        | 441,102 (12.73%)                   |                  |
|                                | CSMii-PHP-12c | 0.3           |                  | 4,649,222       | 366,785 (7.89%)  |                                    |                  |
| MM12-116b                      | CSMii-PHP-12d | 0.3           | 5,000,444        | 427,516 (8.55%) |                  |                                    |                  |
| MM12-115b                      | PHP-13        | 19,879        | 0.3              | 1,624,580       | 174,890 (10.77%) |                                    |                  |
| MM12-117b                      | PHP-14        | 18,768        | 0.3              | 2,320,965       | 35,539 (1.53%)   |                                    |                  |
| MM12-117b                      | PHP-15        | 20,212        | 0.3              | 1,910,387       | 164,997 (8.64%)  |                                    |                  |
| Upper Quartz <sup>35</sup>     | MM12-QC-10    | PHP-19        | 3849             | 0.3             | 2,279,133        | 168,768 (7.41%)                    |                  |
|                                |               | PHPii-19      |                  | 0.3             | 6,965,795        | 21,787 (0.31%)                     |                  |
|                                | MM12-QC-9     | PHP-20        | 5776             | 0.3             | 1,883,409        | 186,238 (9.89%)                    |                  |
|                                |               | PHPii-20      |                  | 0.3             | 4,030,038        | 126,359 (3.14%)                    |                  |
| MM12-QC-8                      | PHP-21        | 5909          | 0.3              | 1,590,777       | 229,319 (14.42%) |                                    |                  |

| Site                        | Core ID                     | SedaDNA ID   | Age <sup>1</sup> | Input (grams) | Total raw reads | PalaeoChip mapped & MEGAN assigned |
|-----------------------------|-----------------------------|--------------|------------------|---------------|-----------------|------------------------------------|
|                             | MM12-QC-6                   | PHPii-21     | 12,860           | 0.3           | 3,551,677       | 36,570 (1.03%)                     |
|                             |                             | PHP-22       |                  | 0.3           | 1,135,493       | 41,668 (3.67%)                     |
|                             |                             | PHPii-22     |                  | 0.3           | 4,944,689       | 73,310 (1.48%)                     |
|                             | MM12-QC-4                   | PHP-23       | 14,939           | 0.3           | 1,207,782       | 26,776 (2.22%)                     |
|                             |                             | PHPii-23a    |                  | 0.3           | 5,380,376       | 17,206 (0.32%)                     |
|                             |                             | PHPii-23b    |                  | 0.3           | 8,141,488       | 24,204 (0.30%)                     |
|                             | MM12-QC-3                   | PHP-24       | 15,759           | 0.3           | 1,129,623       | 17,162 (1.52%)                     |
| MM12-QC-2                   | PHP-25                      | 16,563       | 0.3              | 1,568,411     | 29,419 (1.87%)  |                                    |
| Blanks                      | Extraction Blanks (Batch 1) | PHP-10-BK    | na               |               | 9,882           | 81 (0.82%)                         |
|                             |                             | PHP-18-BK    | na               |               | 1,495           |                                    |
|                             |                             | PHP-26-BK    | na               |               | 7,351           |                                    |
|                             | Library Blanks (Batch 1)    | LibBK-PHP_CL | na               |               | 4,451           |                                    |
|                             | Extraction Blanks (Batch 2) | PHPii-BK27   | na               |               | 2,316           |                                    |
|                             |                             | PHPii-BK28   | na               |               | 4,045           |                                    |
|                             |                             | PHPii-BK29   | na               |               | 2,170           |                                    |
| CSMii-BK2                   |                             | na           |                  | 8,681         |                 |                                    |
| Library Blanks (Batch 2)    | PHPii-LB                    | na           |                  | 4,570         |                 |                                    |
|                             | CSMii-LB                    | na           |                  | 275           |                 |                                    |
| Extraction Blanks (Batch 3) | SET-BK22                    | na           |                  | 55,877        |                 |                                    |
|                             | SET-BK23                    | na           |                  | 852           |                 |                                    |
| Library Blanks (Batch 3)    | SET-BK24                    | na           |                  | 475           |                 |                                    |

<sup>1</sup>Median modeled ages.

Cells shaded by core ID.

## 2.5.2 Normalized read proportions by site

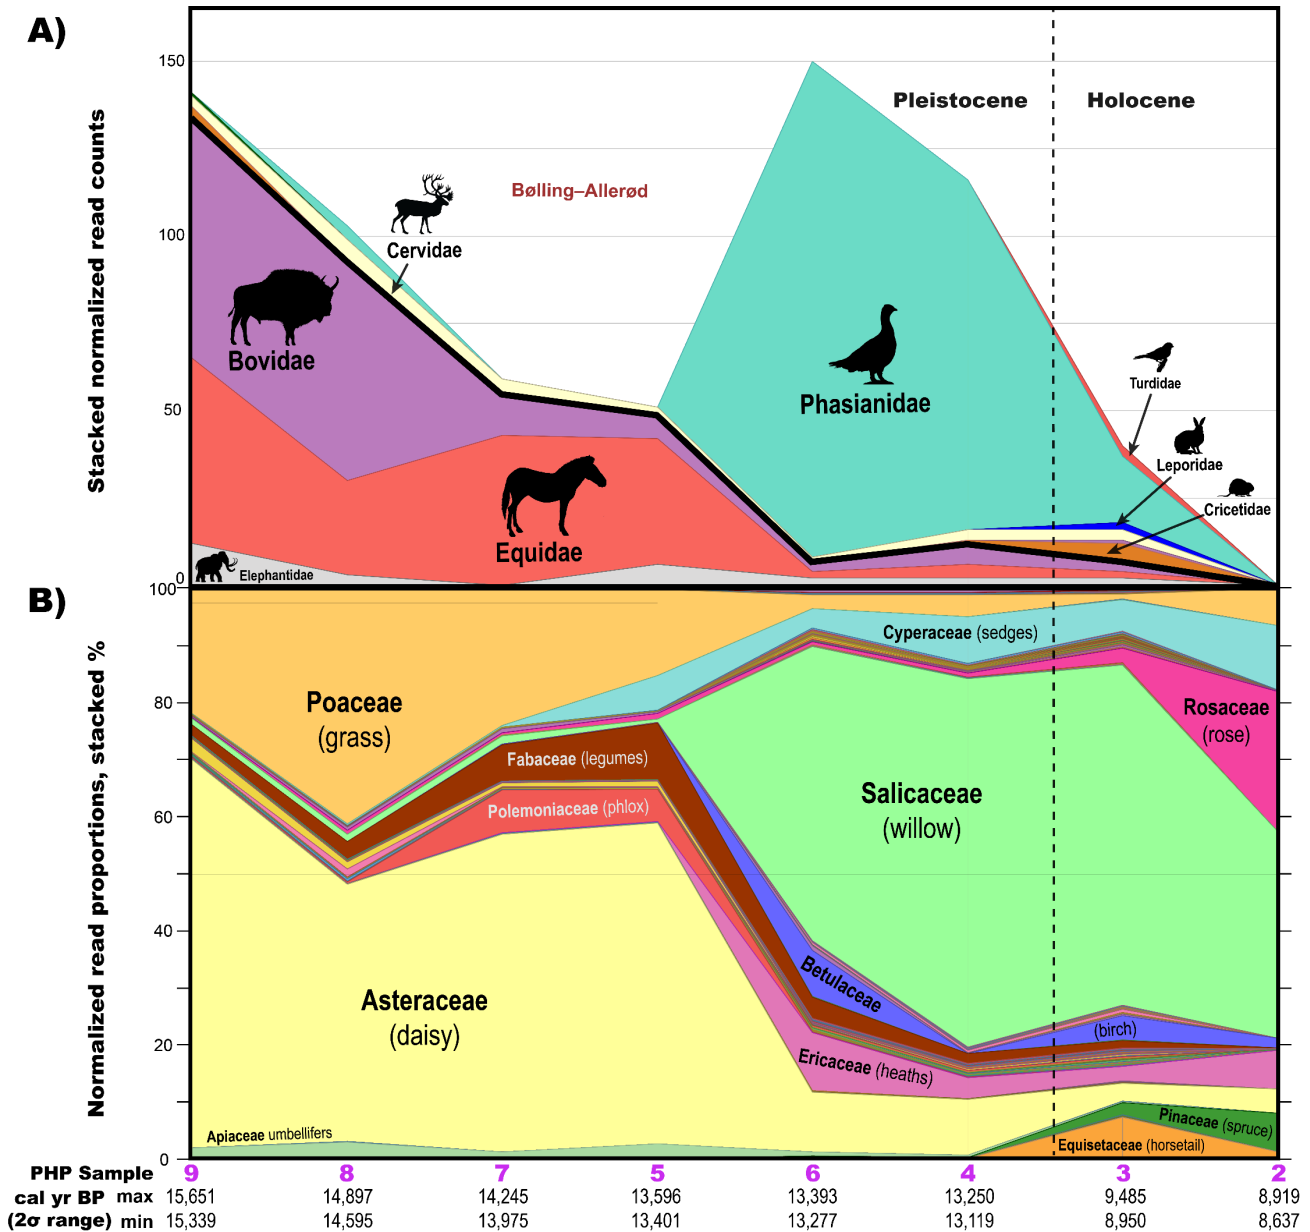

**Lucky Lady II sedaDNA samples and calendar ages**

**Supplementary Figure 10** Lucky Lady II stacked normalized reads assigned to the rank 'family' in A) Animalia (insects excluded) with read counts, and B) Viridiplantae with proportions.

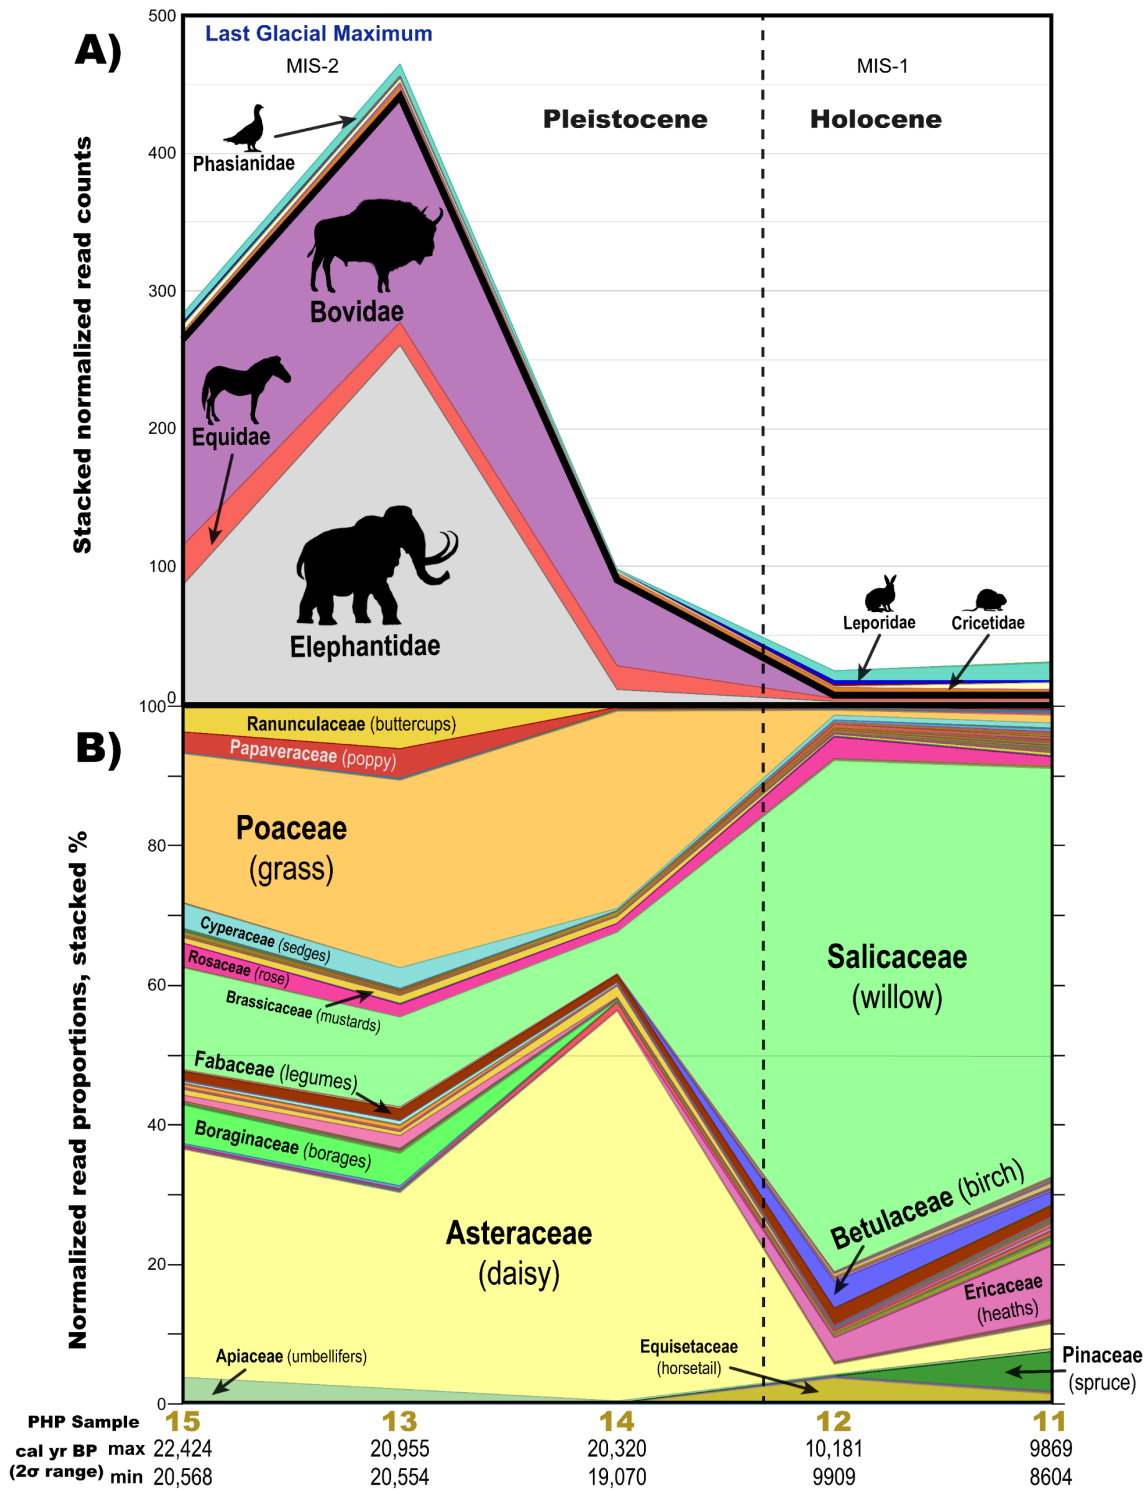

**Upper Goldbottom sedaDNA samples and calendar ages**

**Supplementary Figure 11** Upper Goldbottom stacked normalized reads assigned to the rank ‘family’ in A) Animalia (insects excluded) with read counts, and B) Viridiplantae with proportions.

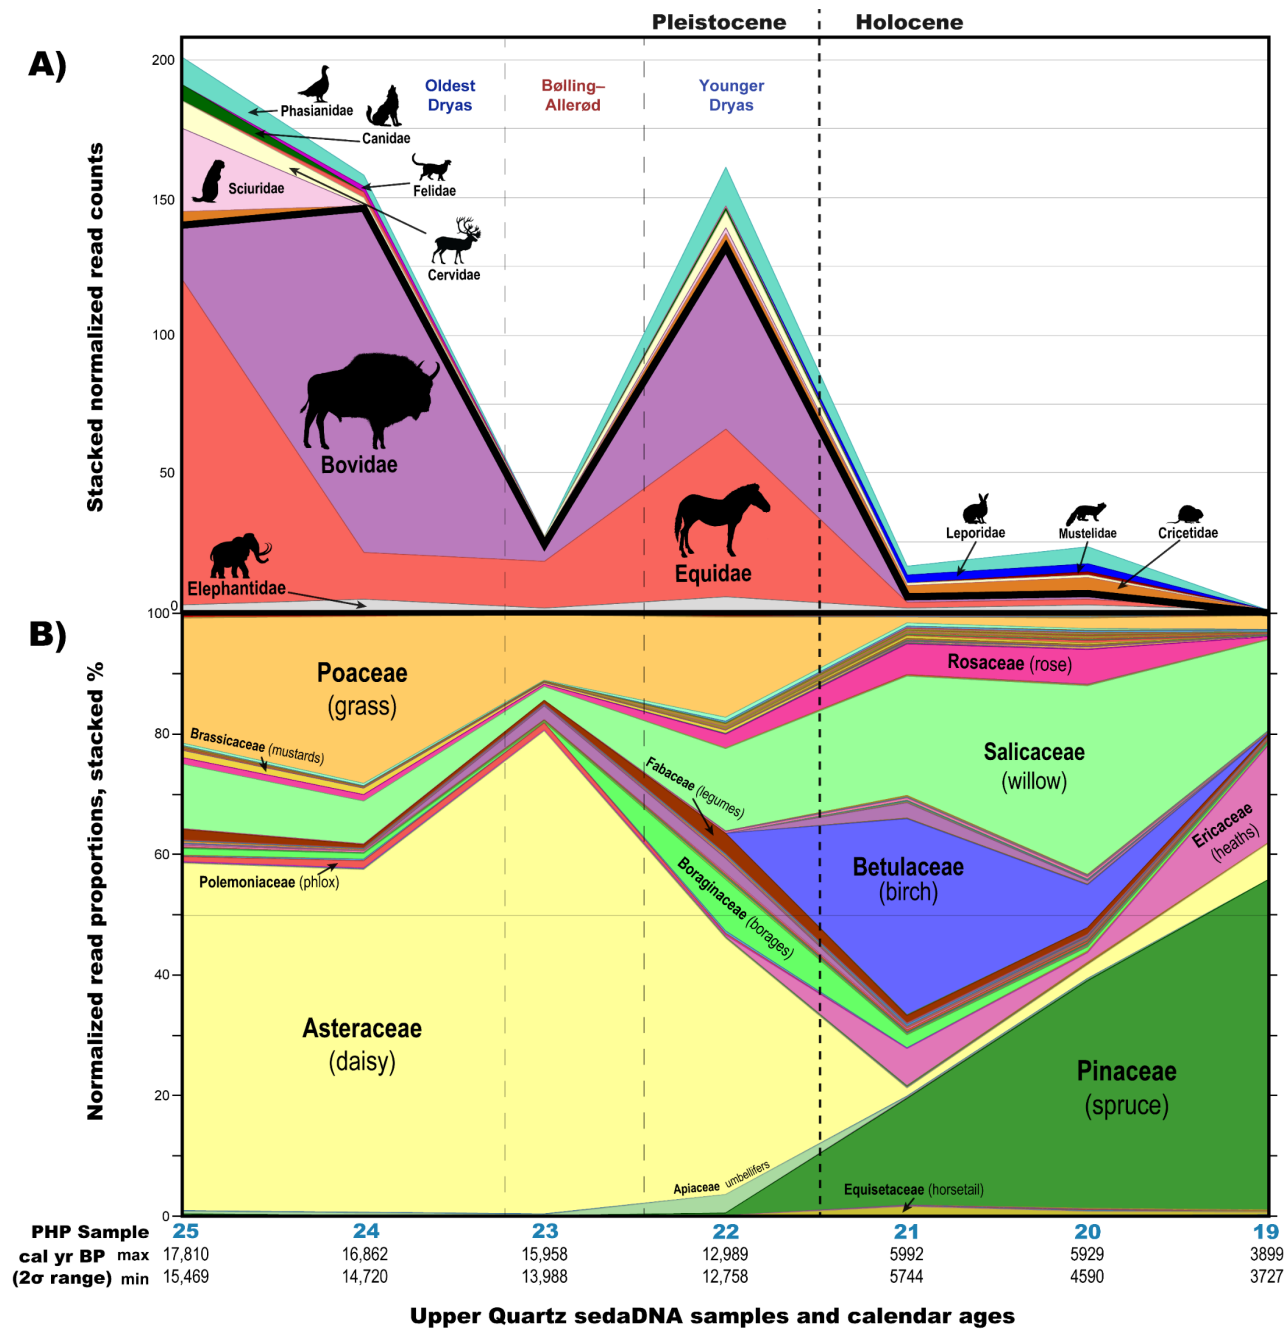

**Supplementary Figure 12** Upper Quartz stacked normalized reads assigned to the rank ‘family’ in A) Animalia (insects excluded) with read counts, and B) Viridiplantae with proportions.

### 2.5.3 Assessing ancient DNA damage

When mapping to a specific reference, *mapDamage*<sup>53</sup> quantifies the proportion of polymorphic nucleotides in a read relative to the reference to assess whether reads are characteristically damaged on their termini, and as such, are more likely to be ancient. The damage signal being quantified is deamination, which results in C-to-T (or G-to-A) substitutions. These substitution errors rarely occur with modern contaminants. This trend is observed consistently where sufficient read depth is achieved, supporting the argument that these reads are ancient and originate from the samples themselves.

Mapped read counts are inflated however when mapping to a specific organism as compared to taxonomically binned read counts that can be confidently *MEGAN* or *PIA* assigned. This is due to a degree of non-specific mapping of conserved regions of the mitochondrial and chloroplast genomes in highly complex metagenomic samples. This, in some instances, results in stacks of non-specific mapped reads at these conserved sites that contain internal polymorphisms, which causes jagged misincorporation plots and fragment length distributions. Conversely, reads that can be *BLASTn* and *MEGAN/PIA* assigned are individually diagnostic of the identified organism, and hence have smaller counts. Regardless of whether all of the mapped reads utilized for *mapDamage* originate from the specific organism to which they were mapped, or more likely originate from closely related species in the same genus or family, these damage plots show abundant terminal deamination patterns in both plant and animal sequences that are characteristic of ancient DNA. This again suggests that these molecules originate from the samples themselves and are not the result of contamination. Supplemental Figures 13 and 14 provide examples of on-target versus off-target mapping.

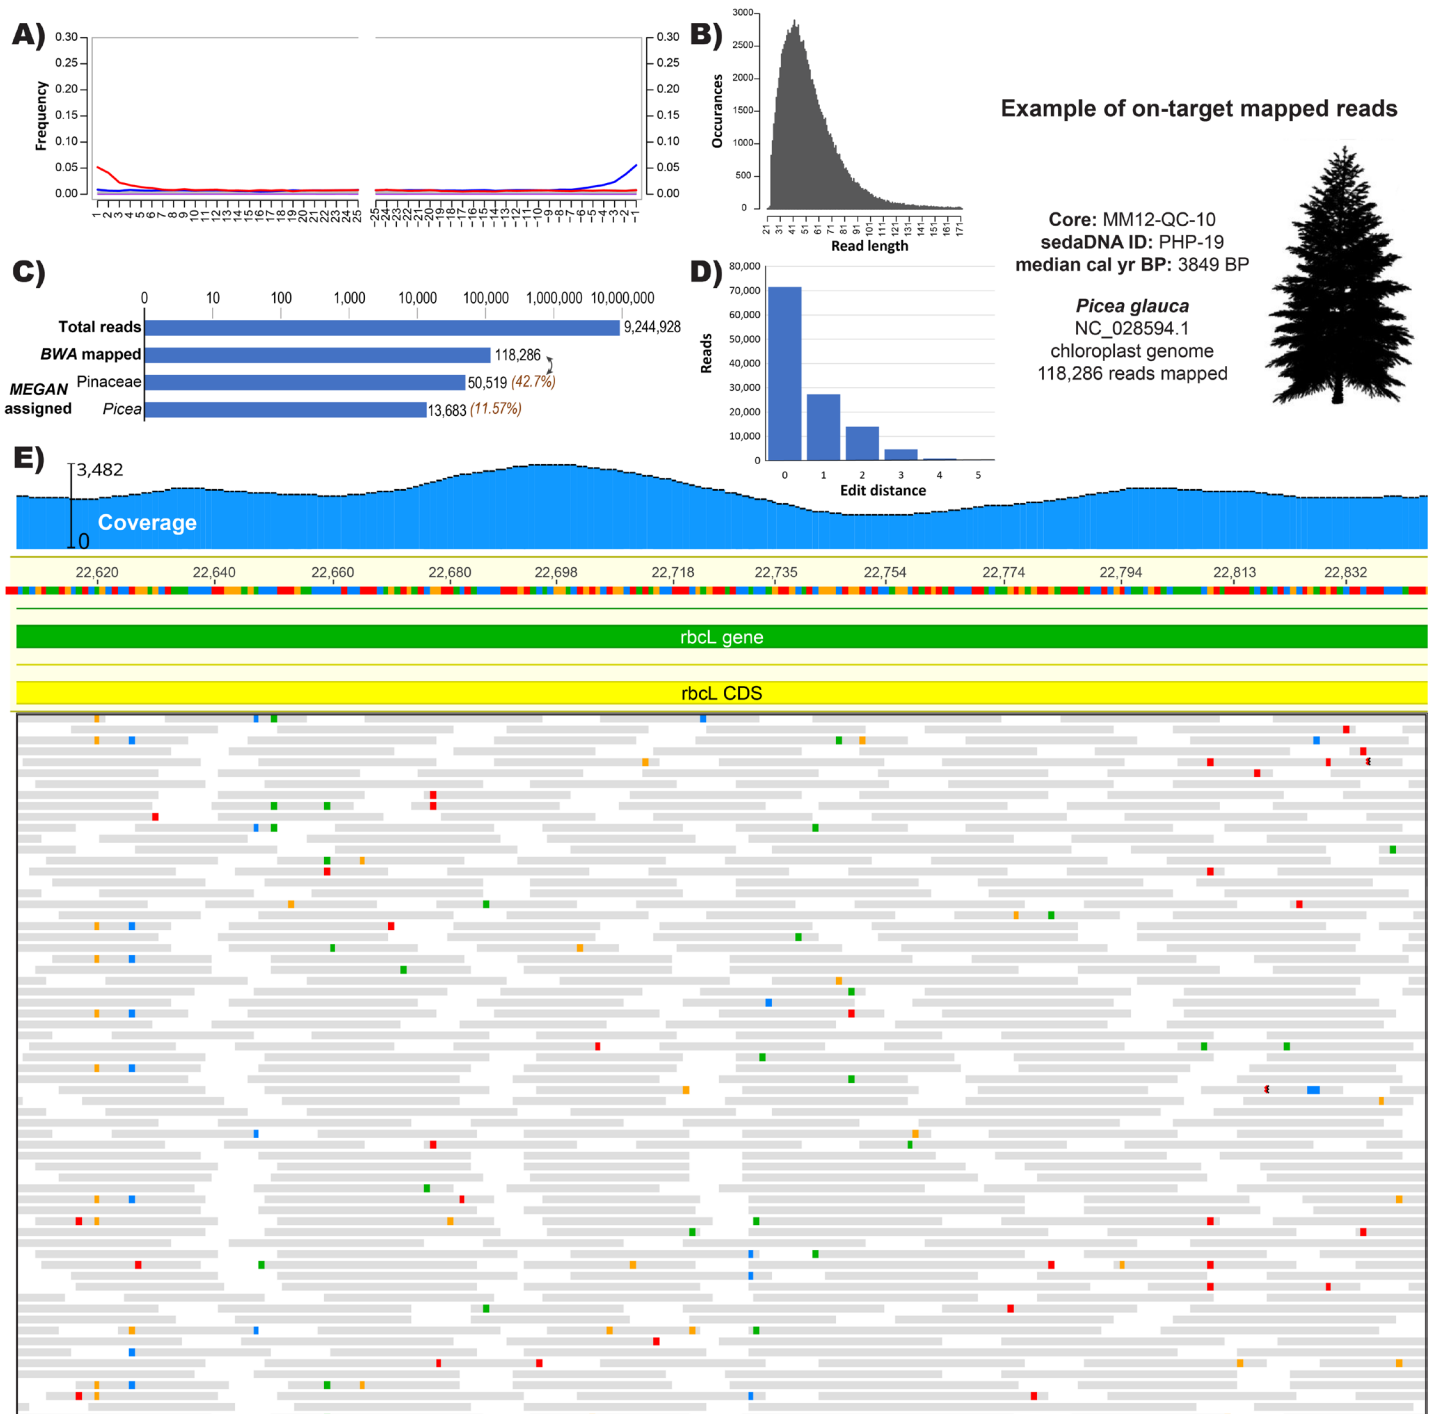

**Supplementary Figure 13** On-target mapped reads for *Picea*

**A)** *mapDamage* fragment misincorporation plot<sup>53</sup> with a flat baseline. **B)** Ancient DNA typical fragment length distribution. **C)** Read mapping and binning specificity on a log scale. **D)** Edit distance distribution plot. Most reads have 0 polymorphisms relative to the mapped reference. **E)** BWA mapped reads in a portion of the *rbcL* gene with a coverage plot. Coloured squares indicate polymorphisms relative to the reference. Visualized in Geneious Prime (2019.2.3, [www.geneious.com](http://www.geneious.com)).



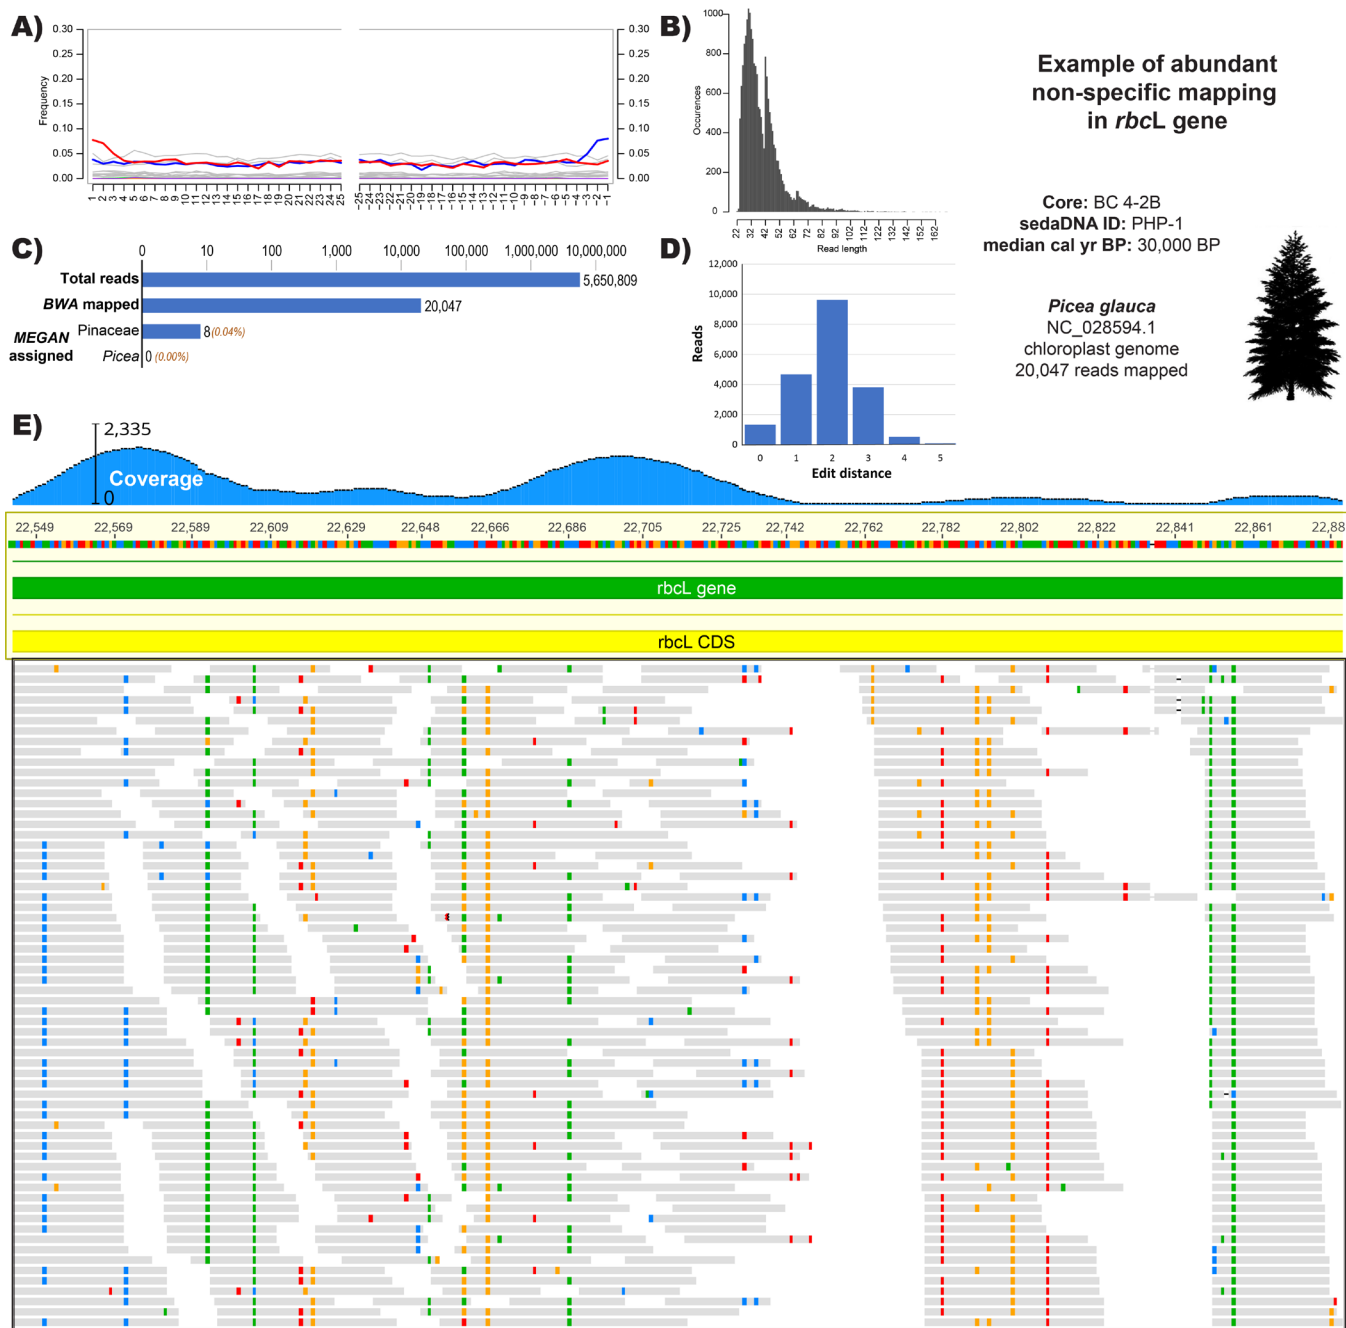

**Supplementary Figure 14** Off-target mapped reads for *Picea*

**A)** *mapDamage* fragment misincorporation plot<sup>53</sup> with jagged baseline, but still containing clearly deaminated terminal bases. **B)** Bimodal fragment length distribution. **C)** Read specificity on a log scale. Note the significant drop in MEGAN read assignment compared with Supplemental Figure 13. **D)** Edit distance distribution plot. Note the increased average mismatches compared with Supplemental Figure 13. **E)** BWA mapped reads in a portion of the *rbcL* gene. Coloured squares indicate polymorphisms relative to the reference. This off-target mapping does not affect the *BLASTn*/*MEGAN* assignments. However, it does inflate the number of reads that map to a reference when assessing *mapDamage* plots. Regardless of off-target reads, there is still a pronounced signal of damage on the ends of these molecules even with polymorphic interior sites. The number of mapped reads here should not be used to infer taxonomic presence, but rather to confirm terminal base damage, supporting the argument that these molecules are ancient.

## 2.5.4 mapDamage plots

### *Mammuthus primigenius* (woolly mammoth) fragment misincorporation plots

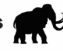

NC\_007596.2

minimum length: 24 bp  
minimum map quality: 30

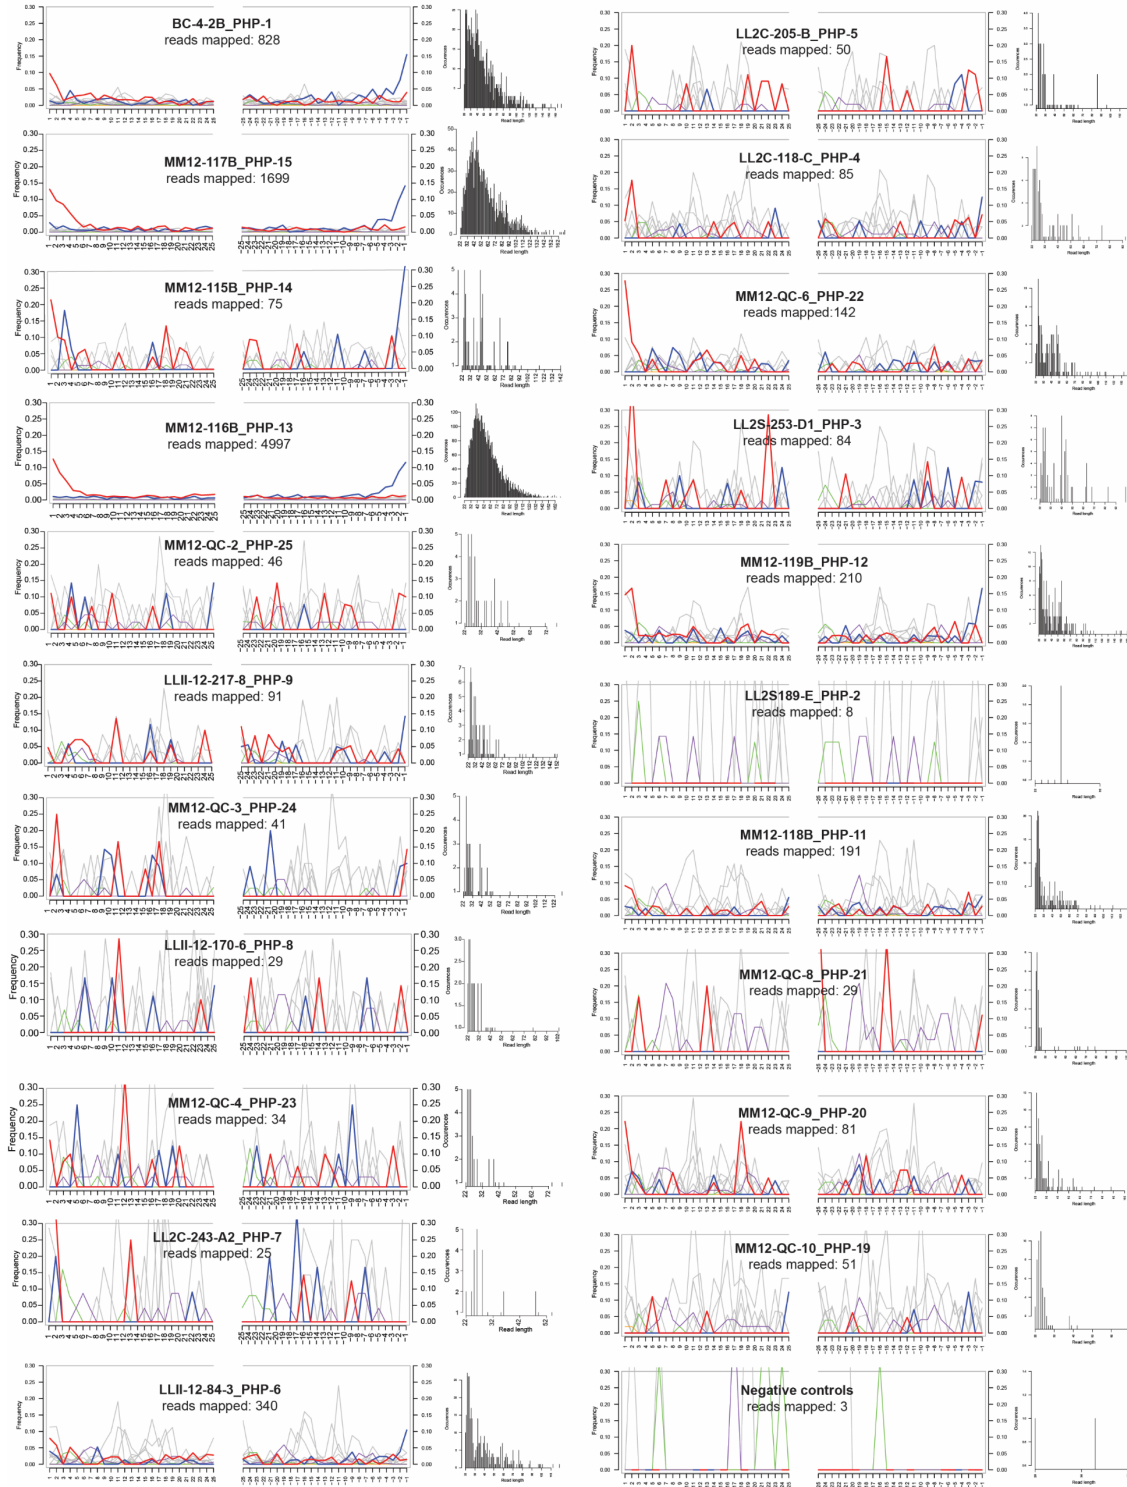

Supplementary Figure 15 *Mammuthus primigenius* mapDamage plots and fragment length distributions. [https://www.ncbi.nlm.nih.gov/nuccore/NC\\_007596.2](https://www.ncbi.nlm.nih.gov/nuccore/NC_007596.2)

*Equus caballus* (caballine horses) fragment misincorporation plots

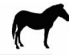

NC\_001640.1

minimum length: 24 bp  
minimum map quality: 30

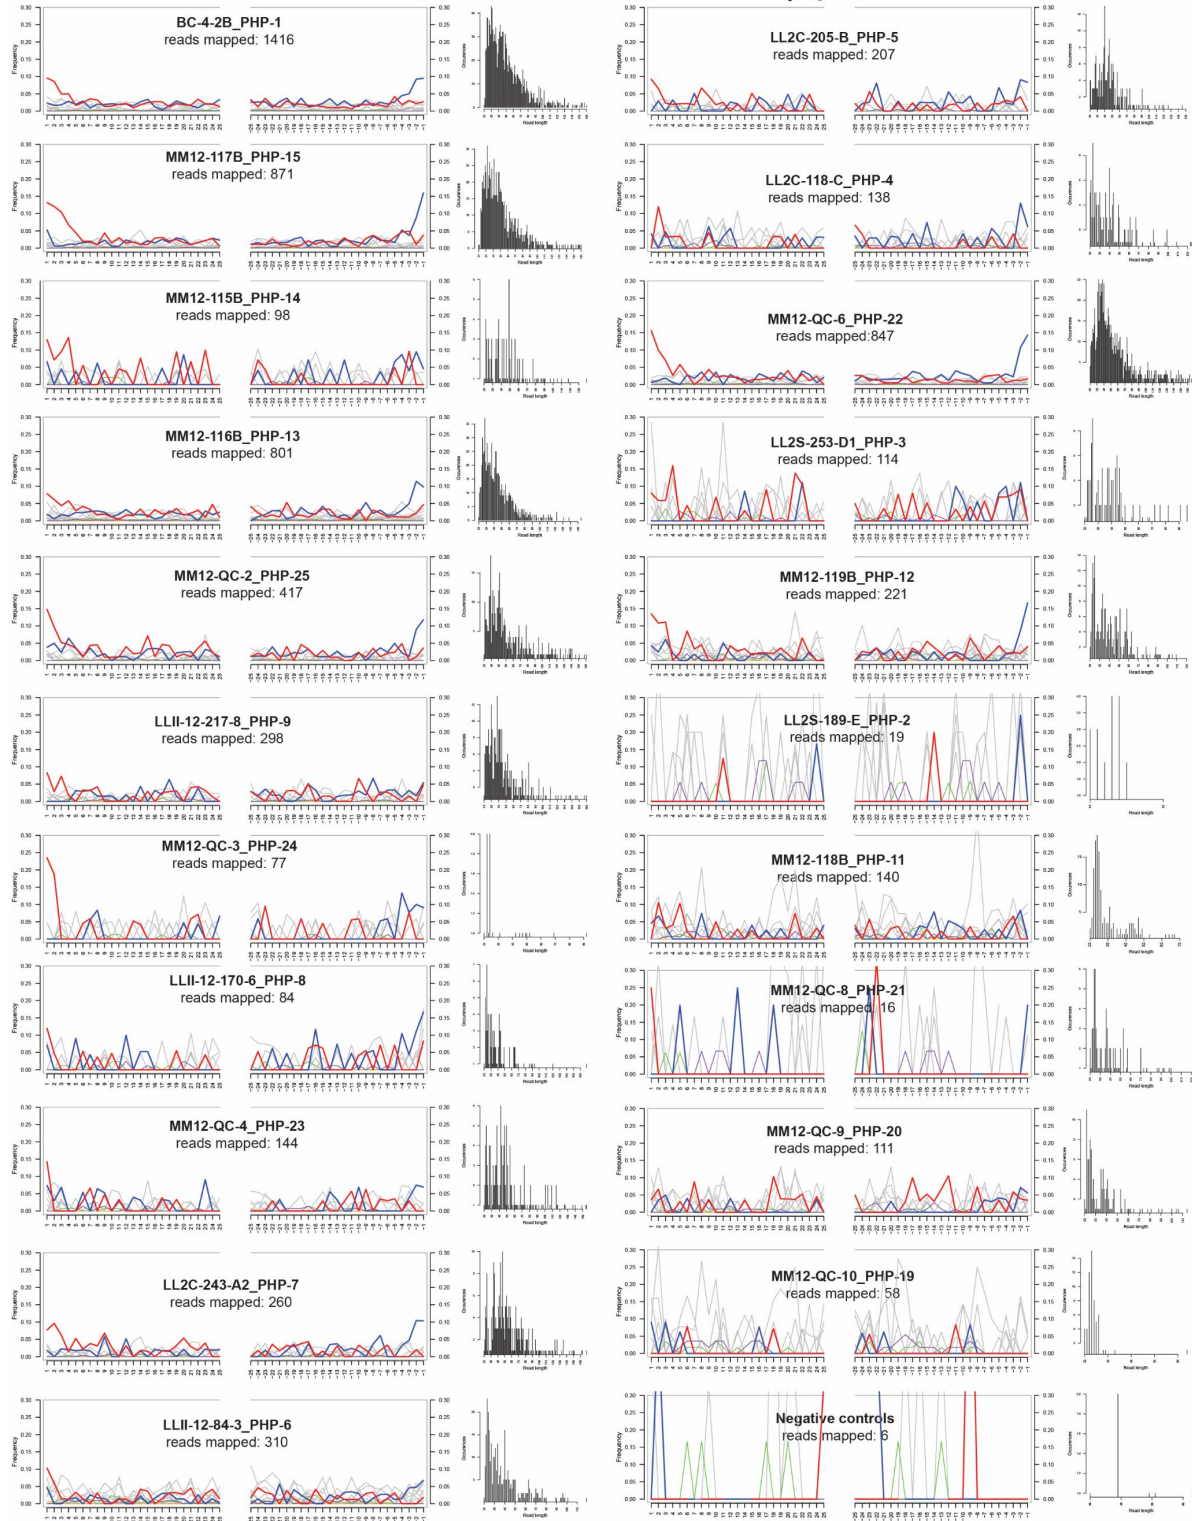

**Supplementary Figure 16** *Equus mapDamage* plots and fragment length distributions. Jagged baseline caused by mapping to Eurasian *Equus caballus* whereas the *Equus caballus lambei* clade (Yukon wild horse) is a better mapping target.

[https://www.ncbi.nlm.nih.gov/nucore/NC\\_001640.1](https://www.ncbi.nlm.nih.gov/nucore/NC_001640.1)

**Bison priscus (steppe bison) fragment misincorporation plots**

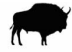

NC\_027233.1

minimum length: 24 bp  
minimum map quality: 30

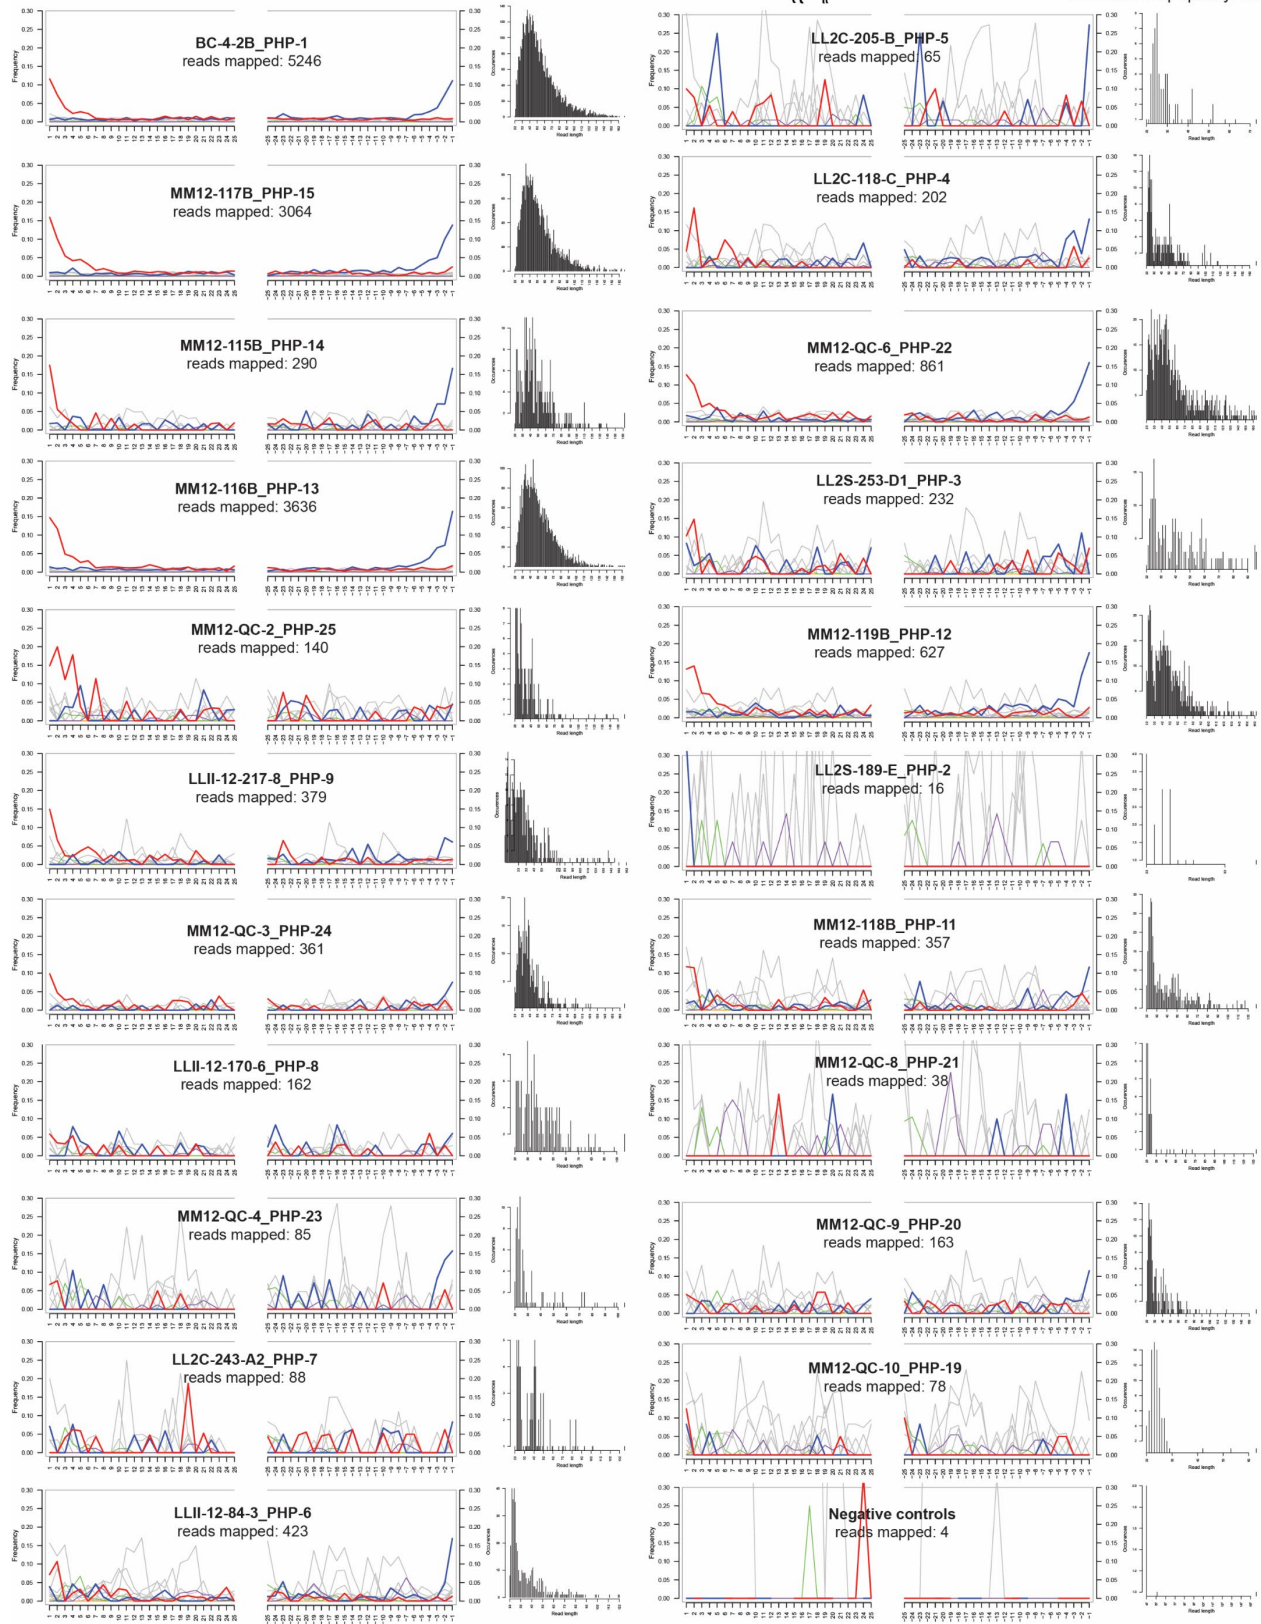

**Supplementary Figure 17** *Bison priscus* mapDamage plots and fragment length distributions.

[https://www.ncbi.nlm.nih.gov/nuccore/NC\\_027233](https://www.ncbi.nlm.nih.gov/nuccore/NC_027233)

**Rangifer tarandus (caribou/reindeer) fragment misincorporation plots**

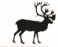

NC\_007703.1

minimum length: 24 bp  
minimum map quality: 30

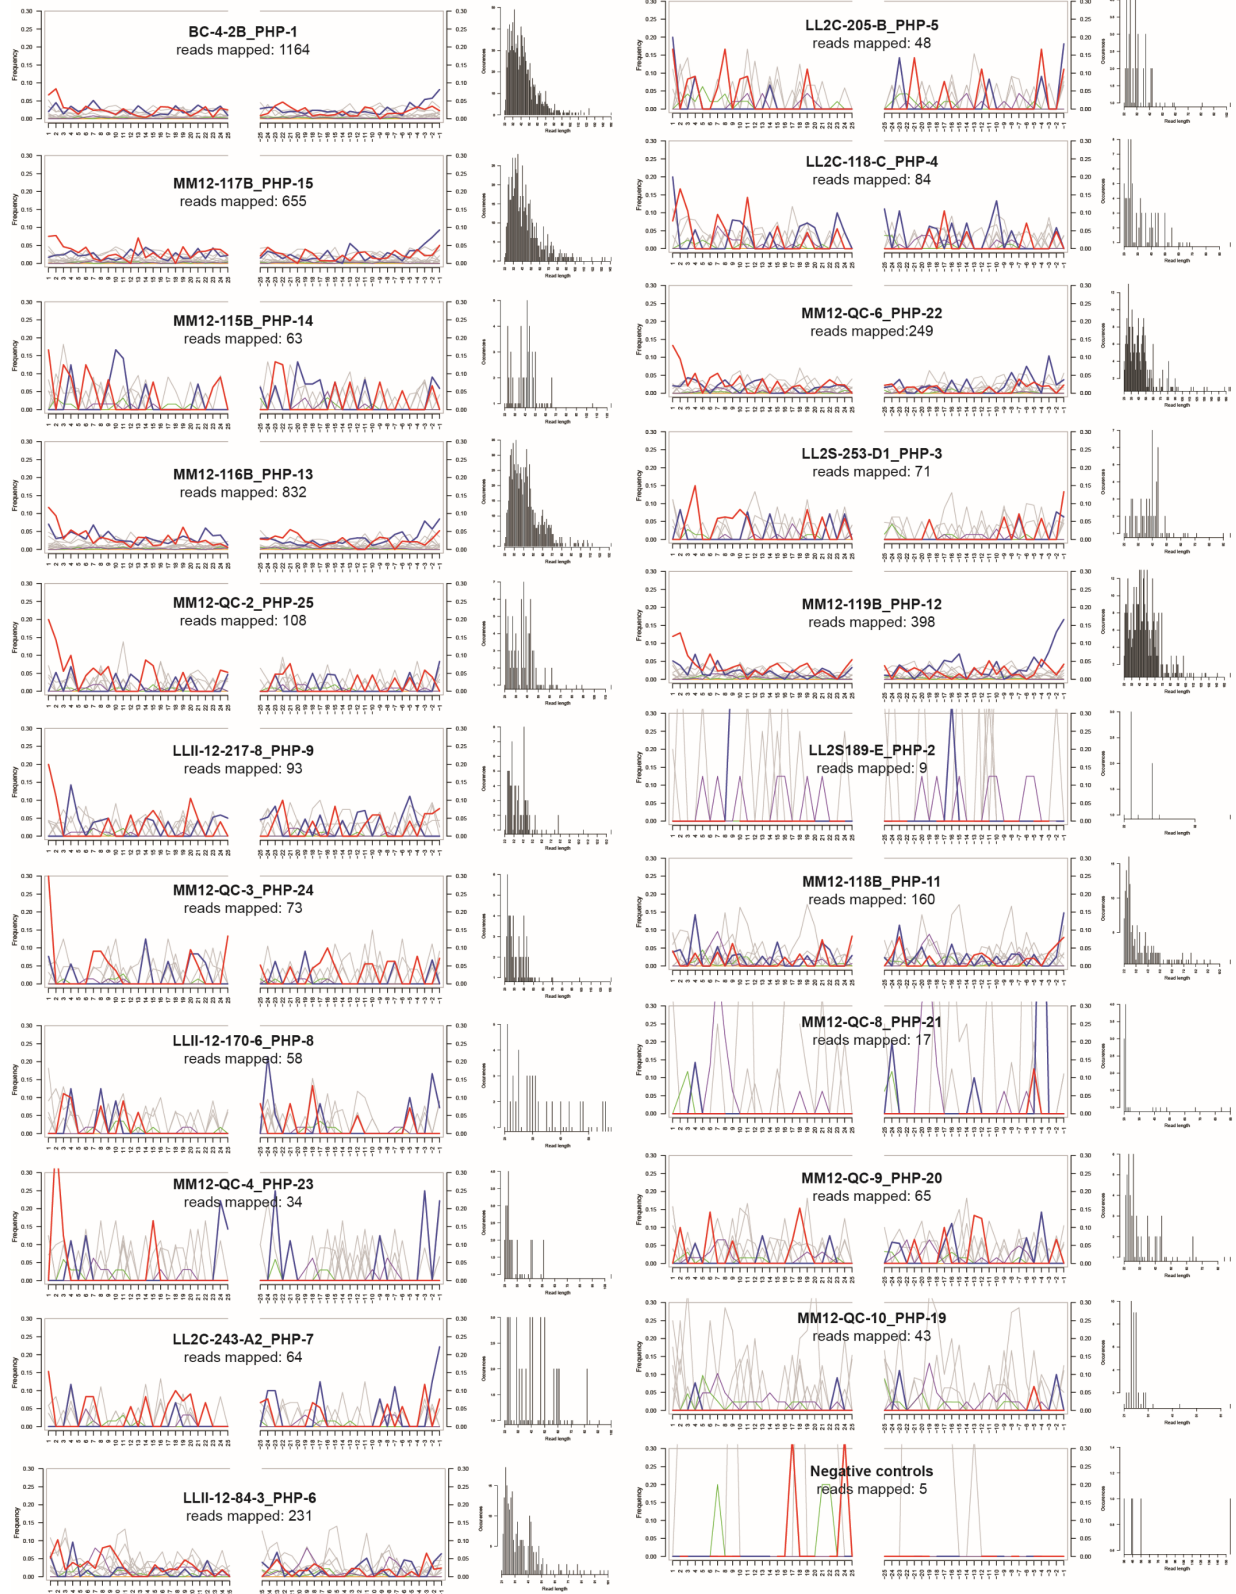

**Supplementary Figure 18** *Rangifer tarandus* mapDamage plots and fragment length distributions. [https://www.ncbi.nlm.nih.gov/nuccore/NC\\_007703](https://www.ncbi.nlm.nih.gov/nuccore/NC_007703)

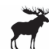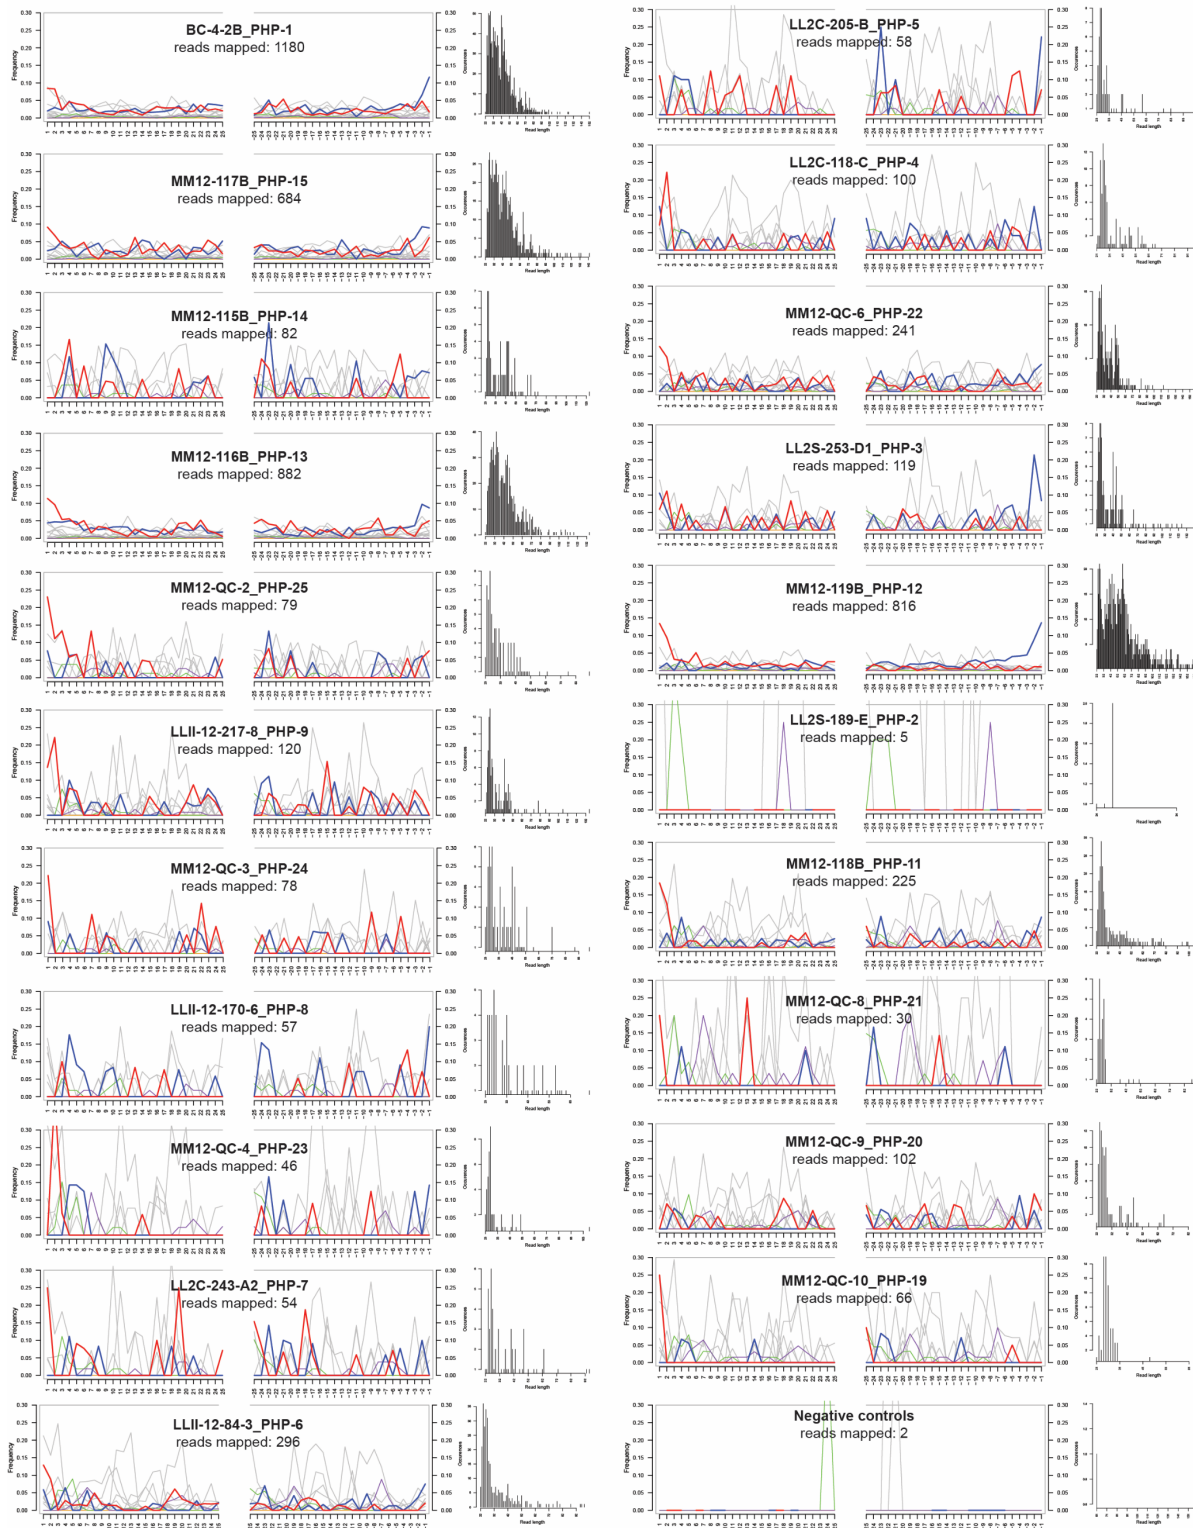

**Supplementary Figure 19** *Alces alces* mapDamage plots and fragment length distributions. Abundant mapped reads in PHP-1/15/13 due to off-target mapping within Cervidae. [https://www.ncbi.nlm.nih.gov/nuccore/NC\\_020677](https://www.ncbi.nlm.nih.gov/nuccore/NC_020677)

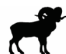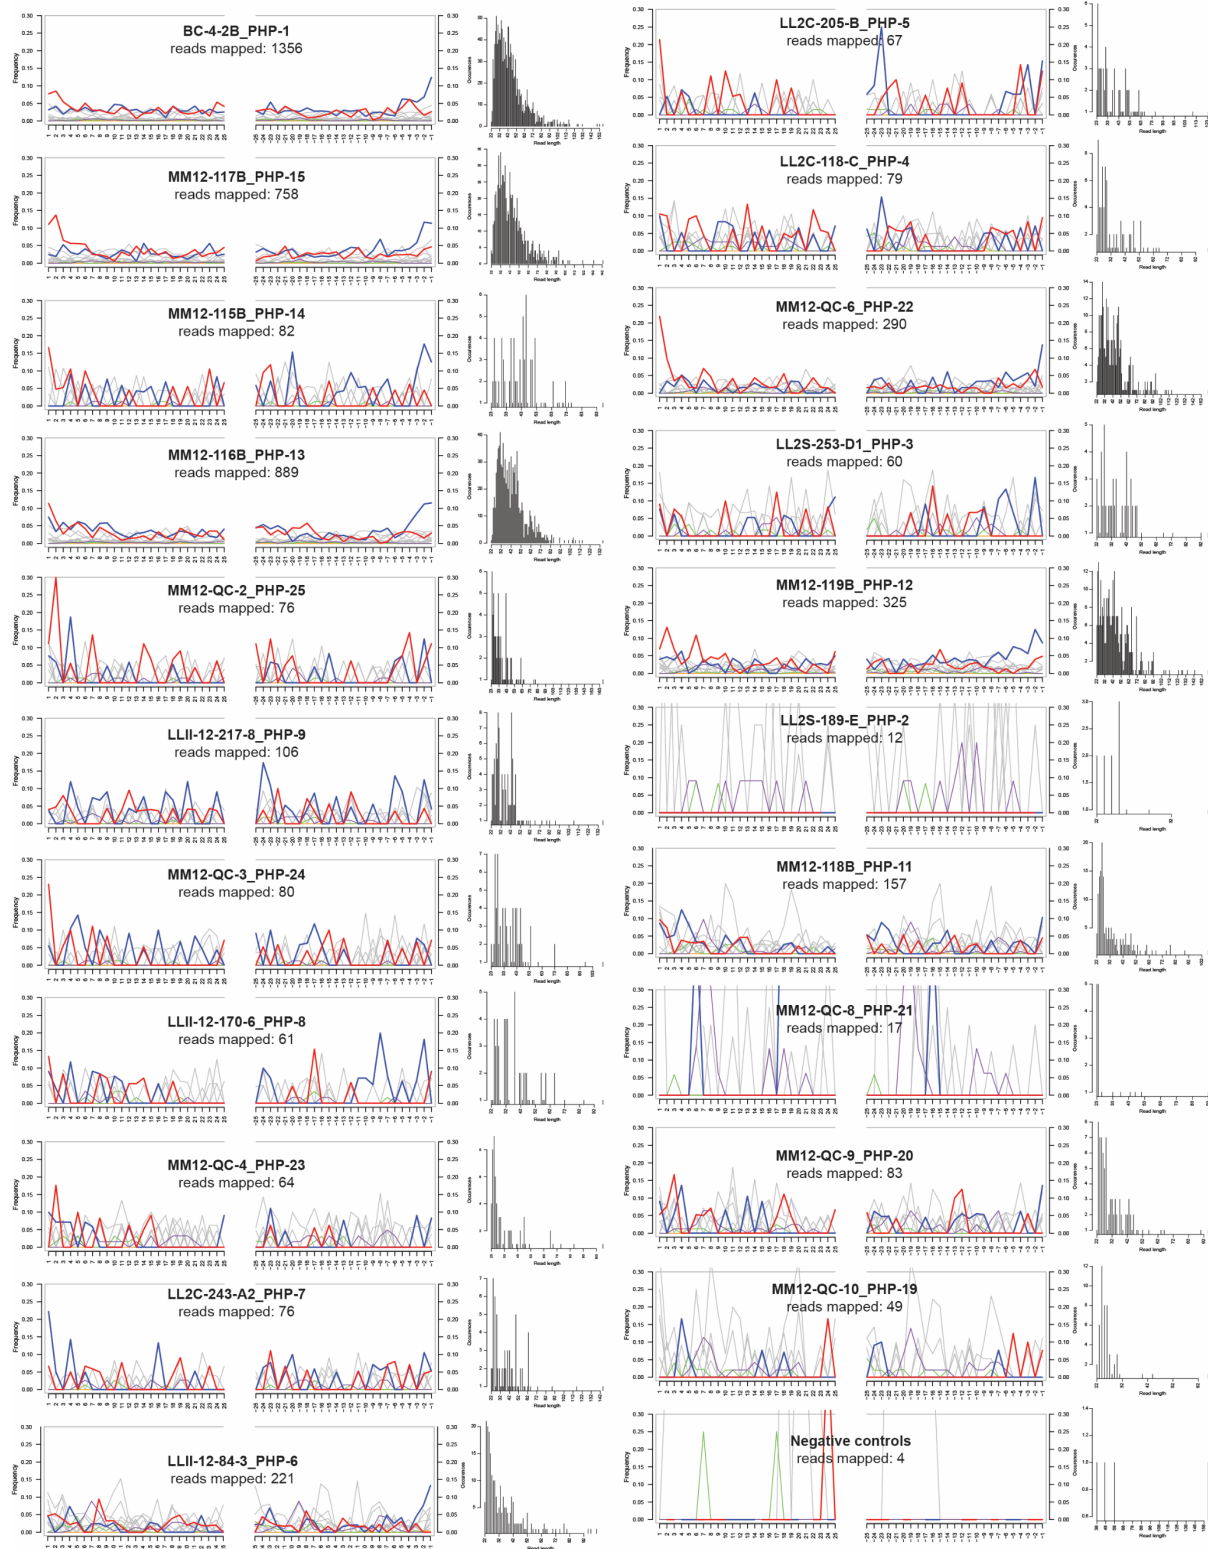

**Supplementary Figure 20** *Ovis canadensis* mapDamage plots and fragment length distributions. [https://www.ncbi.nlm.nih.gov/nuccore/NC\\_015889](https://www.ncbi.nlm.nih.gov/nuccore/NC_015889)

**Lagopus lagopus (willow ptarmigan) fragment misincorporation plots**

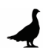

NC\_035568.1

minimum length: 24 bp  
minimum map quality: 30

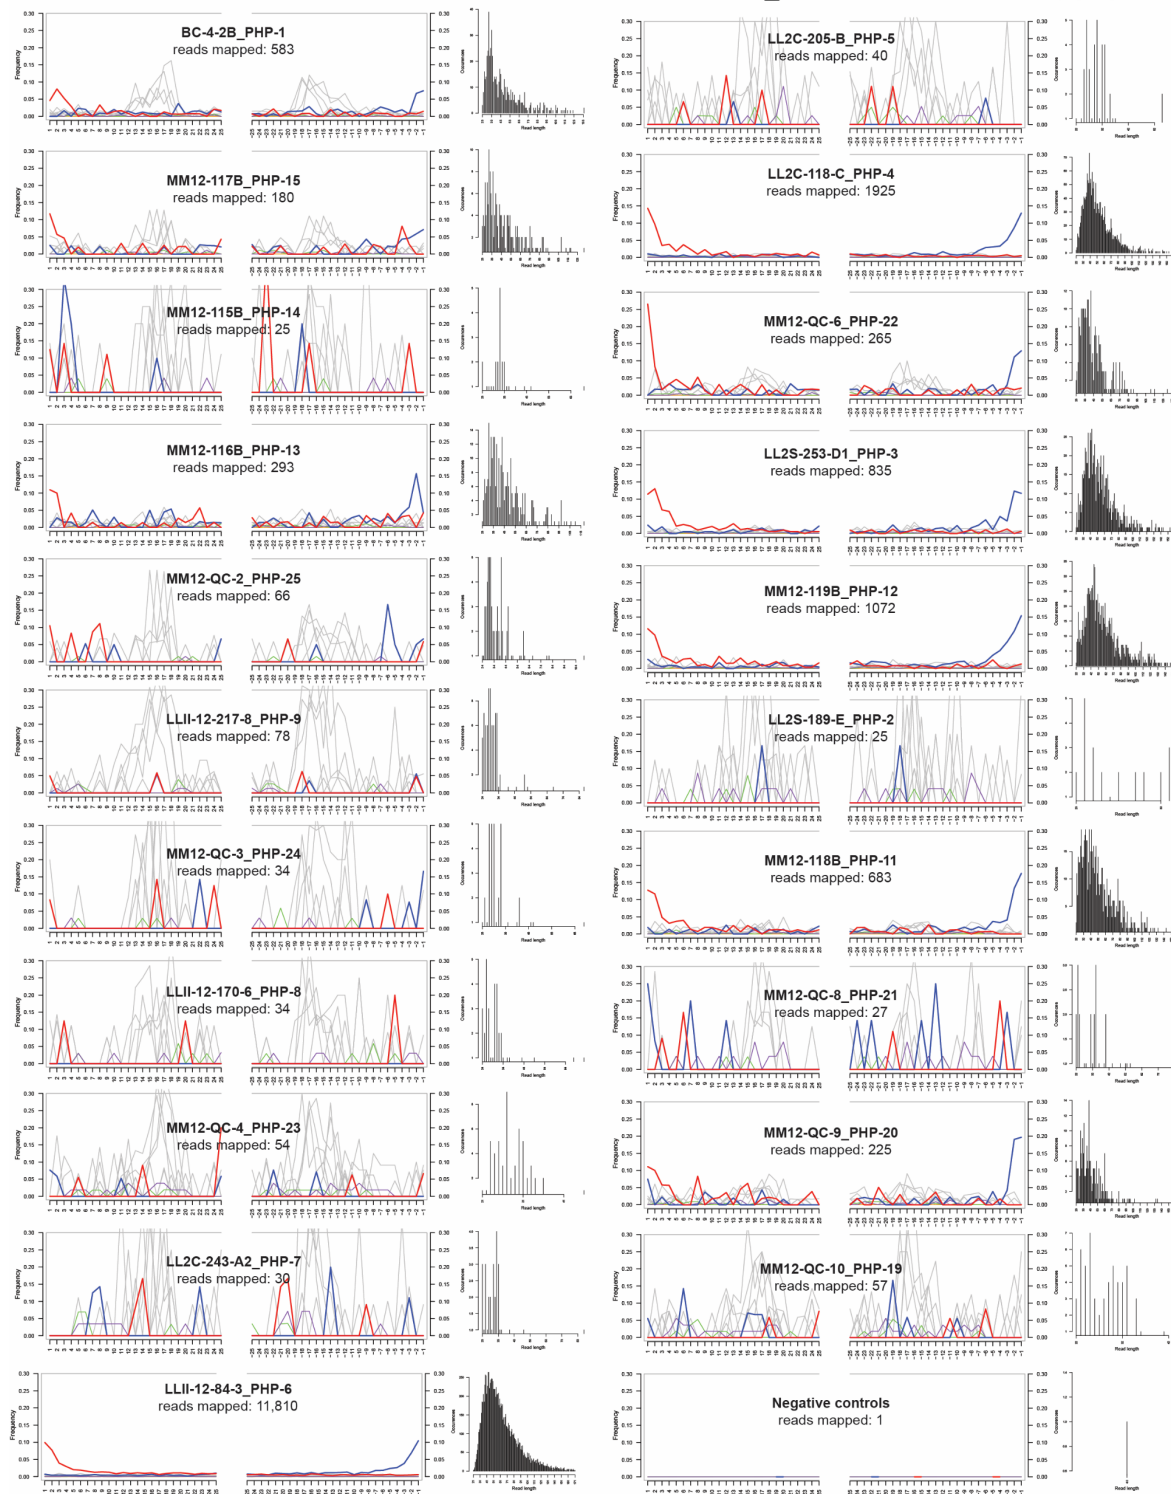

**Supplementary Figure 21** *Lagopus lagopus* mapDamage plots and fragment length distributions.  
[https://www.ncbi.nlm.nih.gov/nucore/NC\\_035568](https://www.ncbi.nlm.nih.gov/nucore/NC_035568)



***Lepus americanus* (snowshoe hare) fragment misincorporation plots**

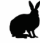

NC\_0240043.1

minimum length: 24 bp  
minimum map quality: 30

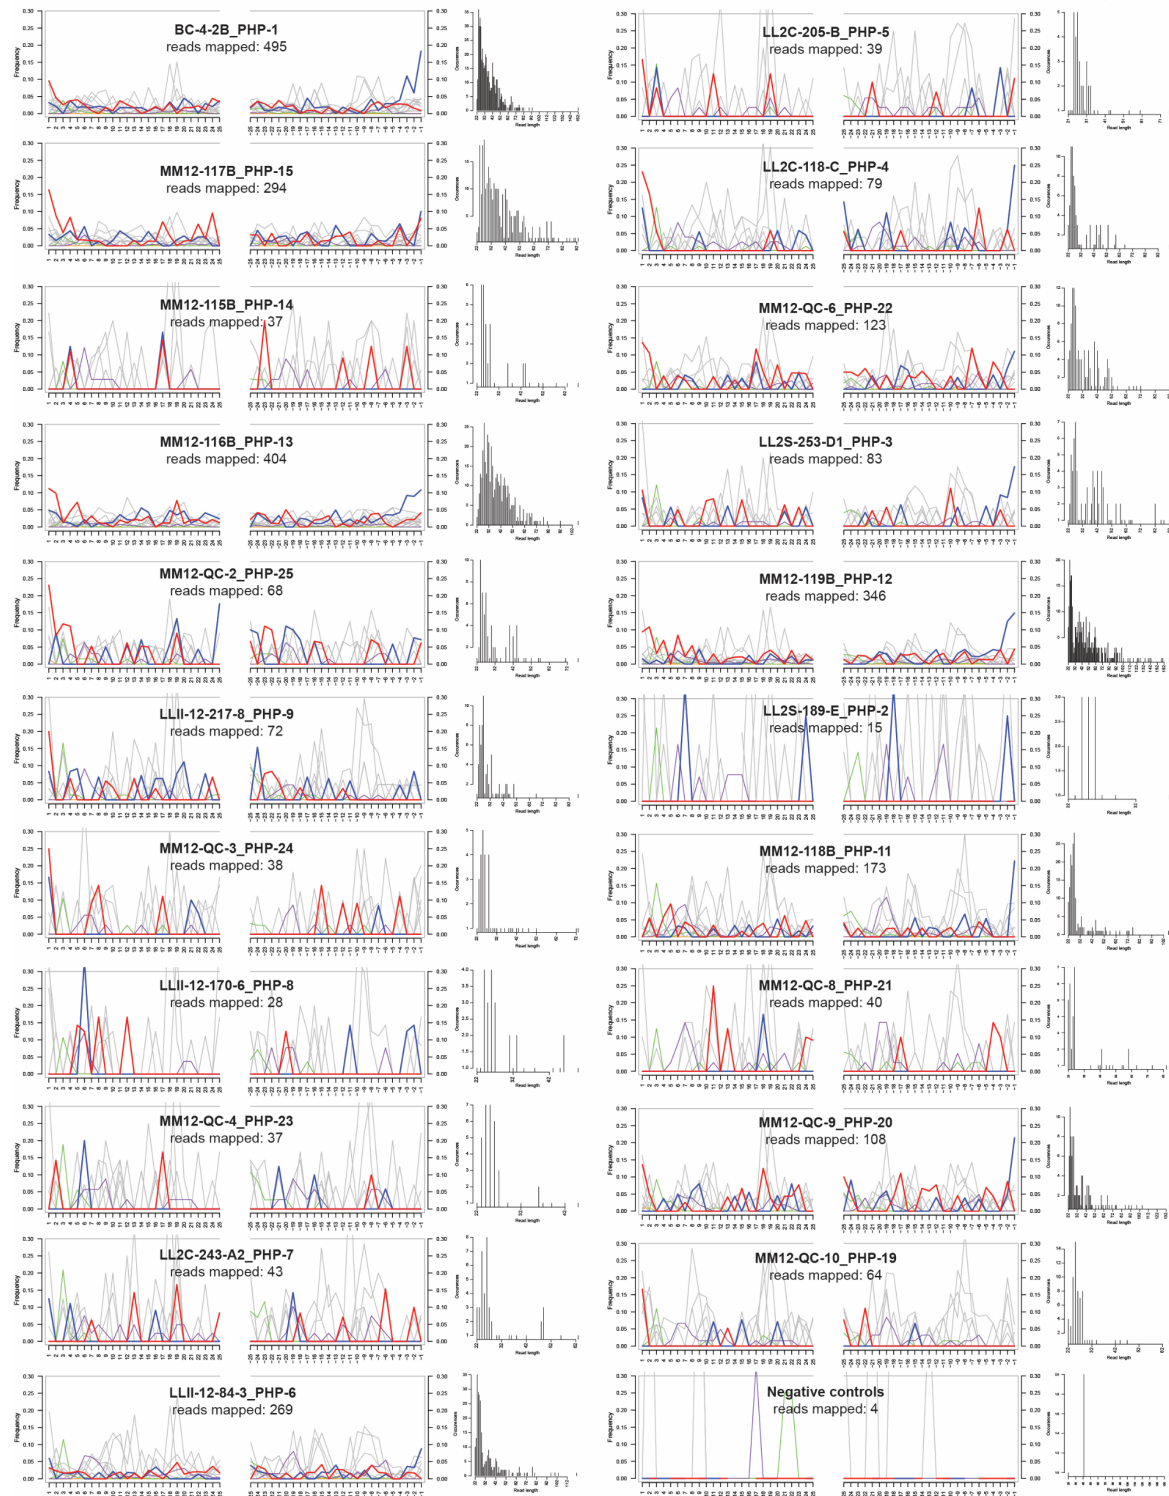

**Supplementary Figure 22** *Lepus americanus* mapDamage plots and fragment length distributions. [https://www.ncbi.nlm.nih.gov/nuccore/NC\\_024043.1](https://www.ncbi.nlm.nih.gov/nuccore/NC_024043.1)

*Microtus agrestis* (field vole) fragment misincorporation plots

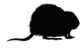

NC\_041250.1

minimum length: 24 bp  
minimum map quality: 30

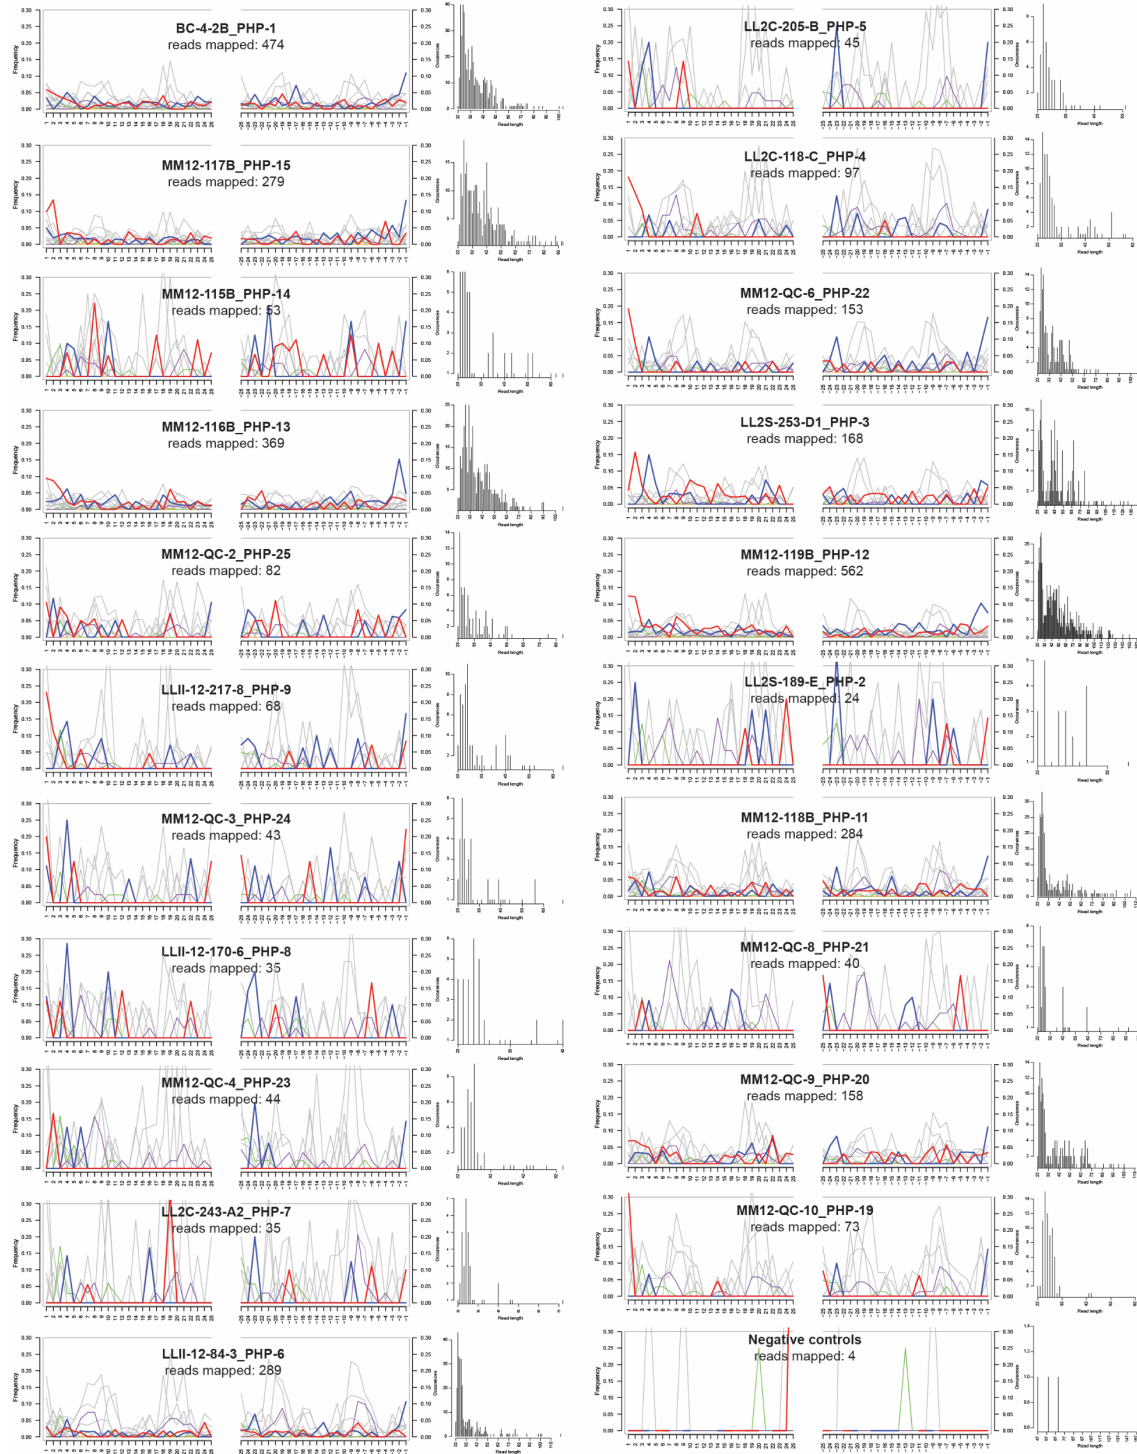

**Supplementary Figure 23** *Microtus agrestis* mapDamage plots and fragment length distributions.  
[https://www.ncbi.nlm.nih.gov/nuccore/NC\\_041250](https://www.ncbi.nlm.nih.gov/nuccore/NC_041250)

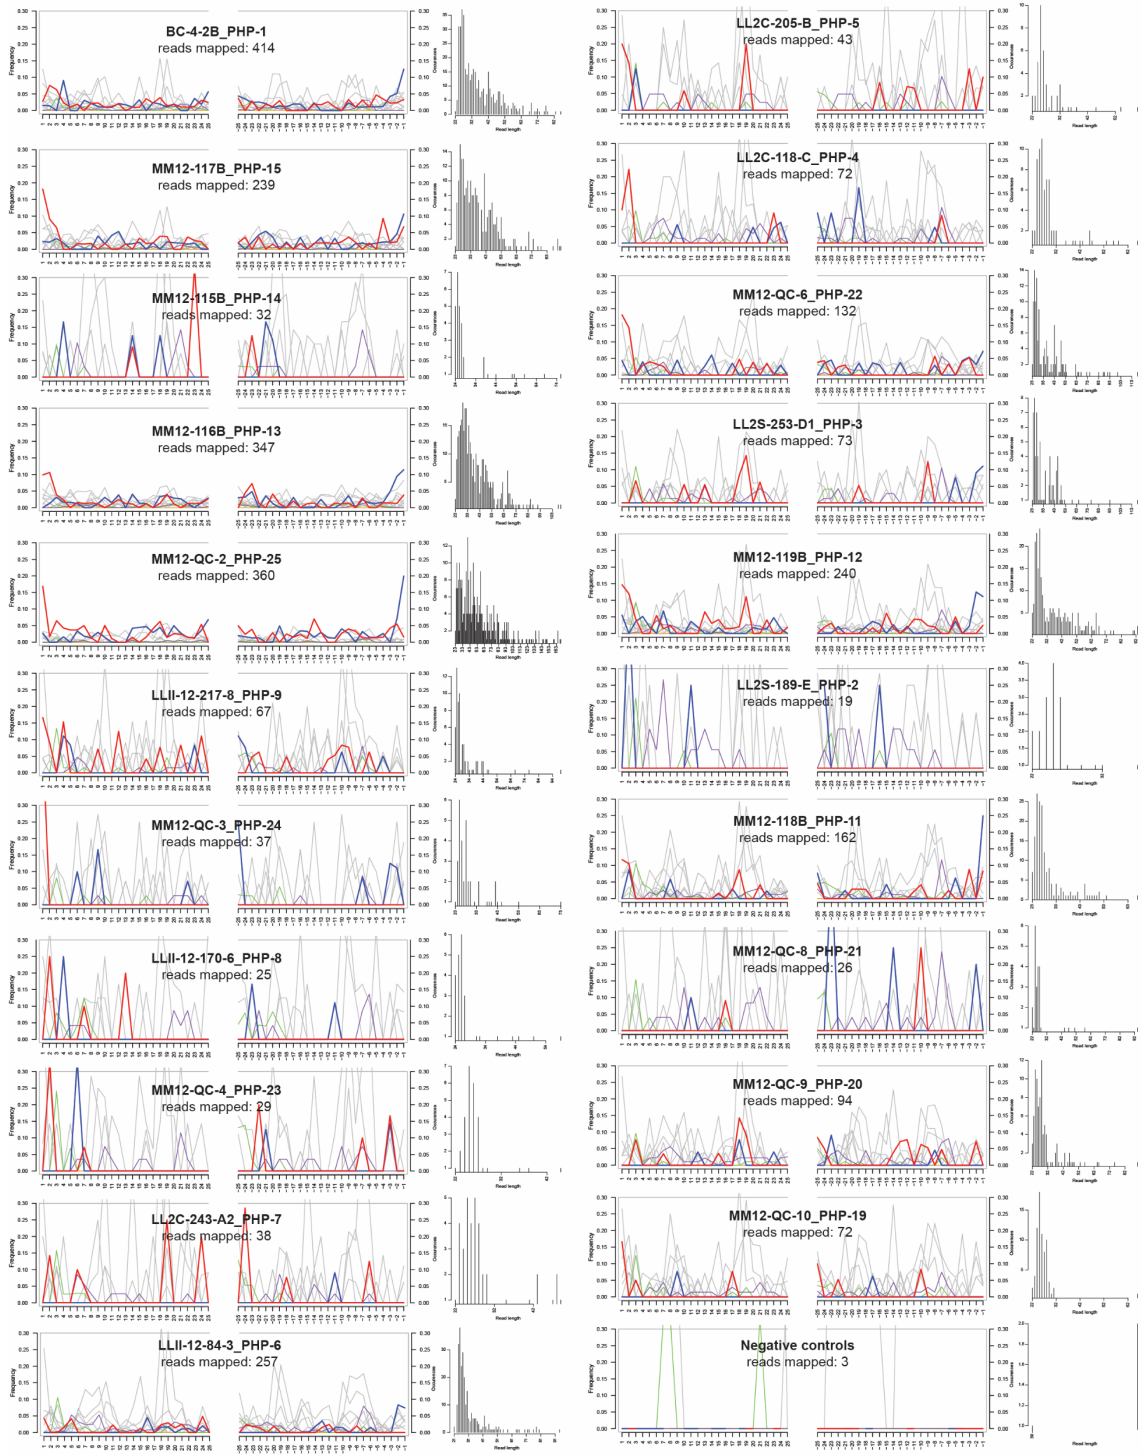

**Supplementary Figure 24** *Uroctellus richardsonii* mapDamage plots and fragment length distributions. [https://www.ncbi.nlm.nih.gov/nucore/NC\\_031209](https://www.ncbi.nlm.nih.gov/nucore/NC_031209)

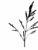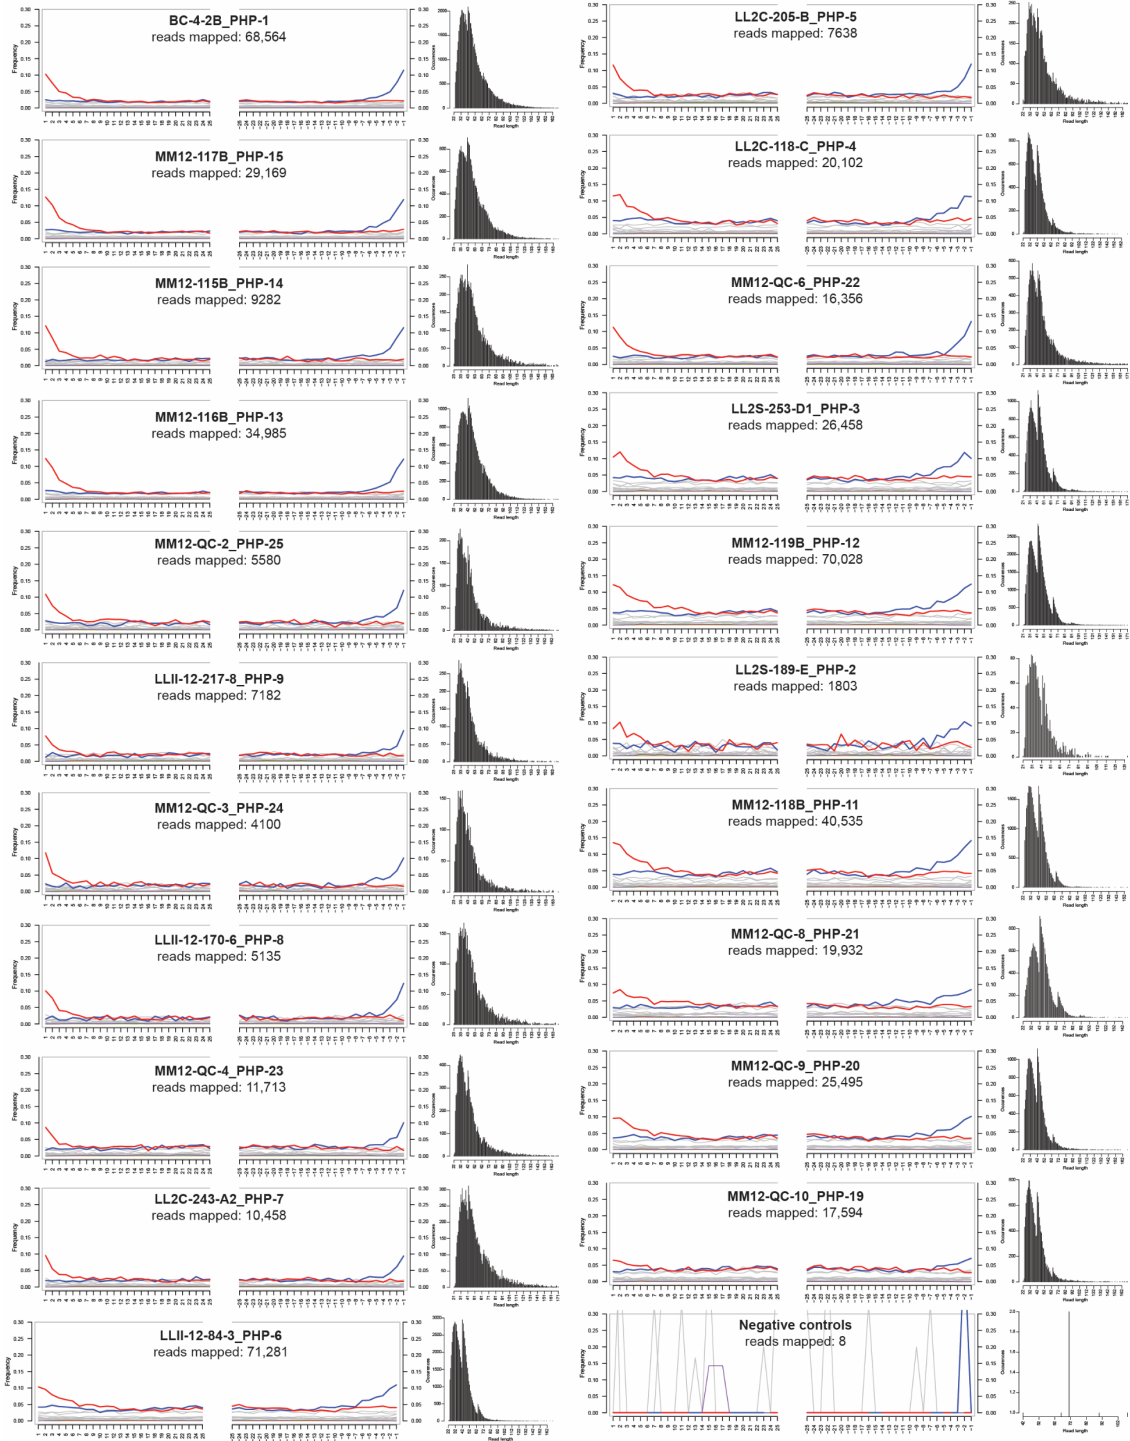

Supplementary Figure 25 *Poa palustris* mapDamage plots and fragment length distributions.  
[https://www.ncbi.nlm.nih.gov/nuccore/NC\\_027484.1](https://www.ncbi.nlm.nih.gov/nuccore/NC_027484.1)

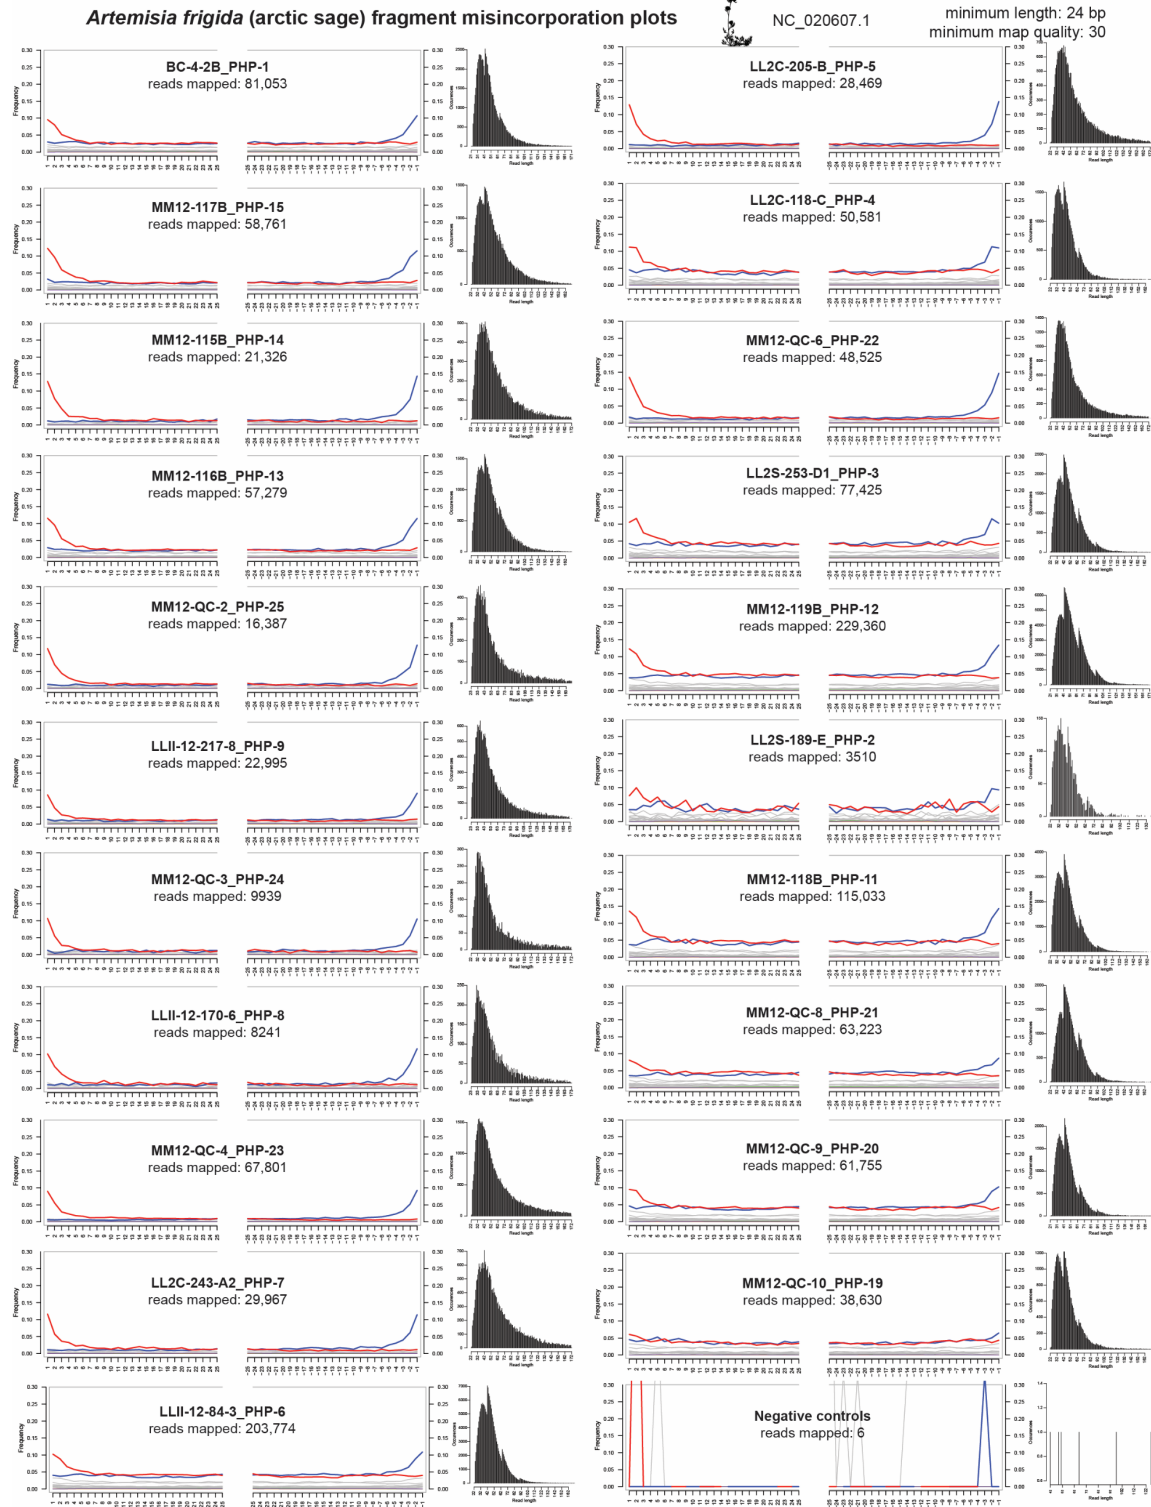

**Supplementary Figure 26** *Artemisia frigida* mapDamage plots and fragment length distributions. [https://www.ncbi.nlm.nih.gov/nucore/NC\\_020607](https://www.ncbi.nlm.nih.gov/nucore/NC_020607)

*Salix interior* (sandbar willow) fragment misincorporation plots

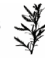

NC\_024681.1

minimum length: 24 bp  
minimum map quality: 30

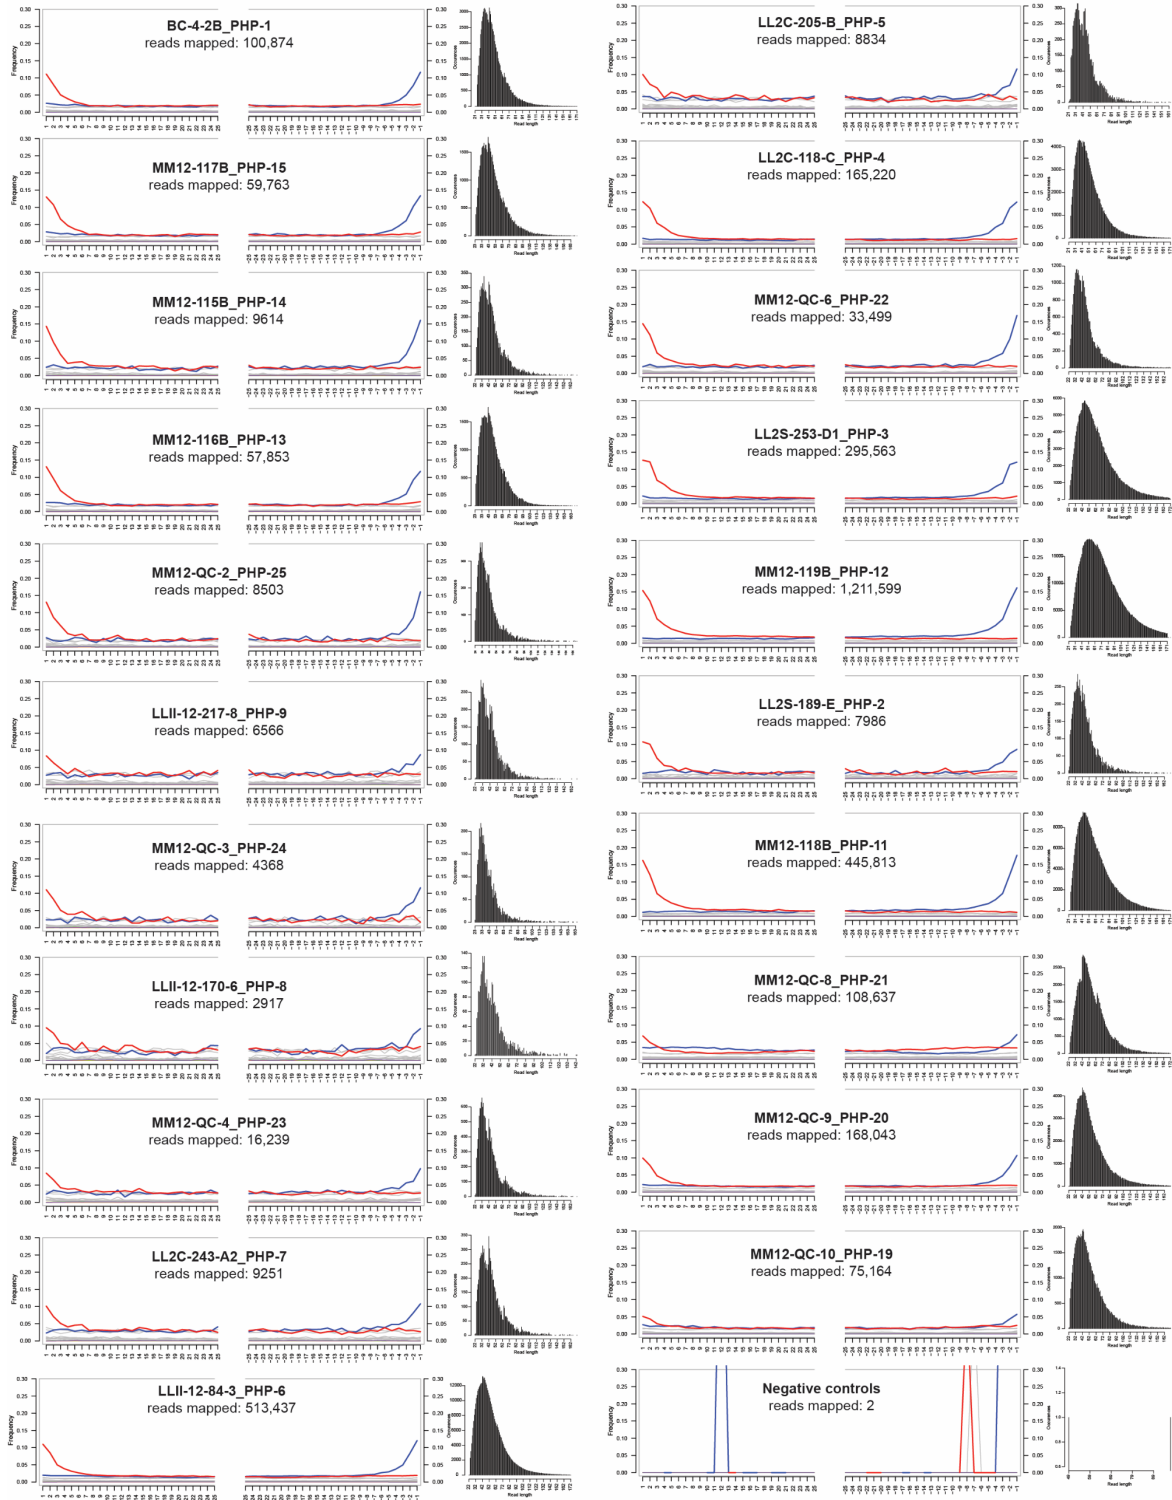

Supplementary Figure 27 *Salix interior* mapDamage plots and fragment length distributions.  
[https://www.ncbi.nlm.nih.gov/nuccore/NC\\_024681](https://www.ncbi.nlm.nih.gov/nuccore/NC_024681)

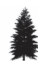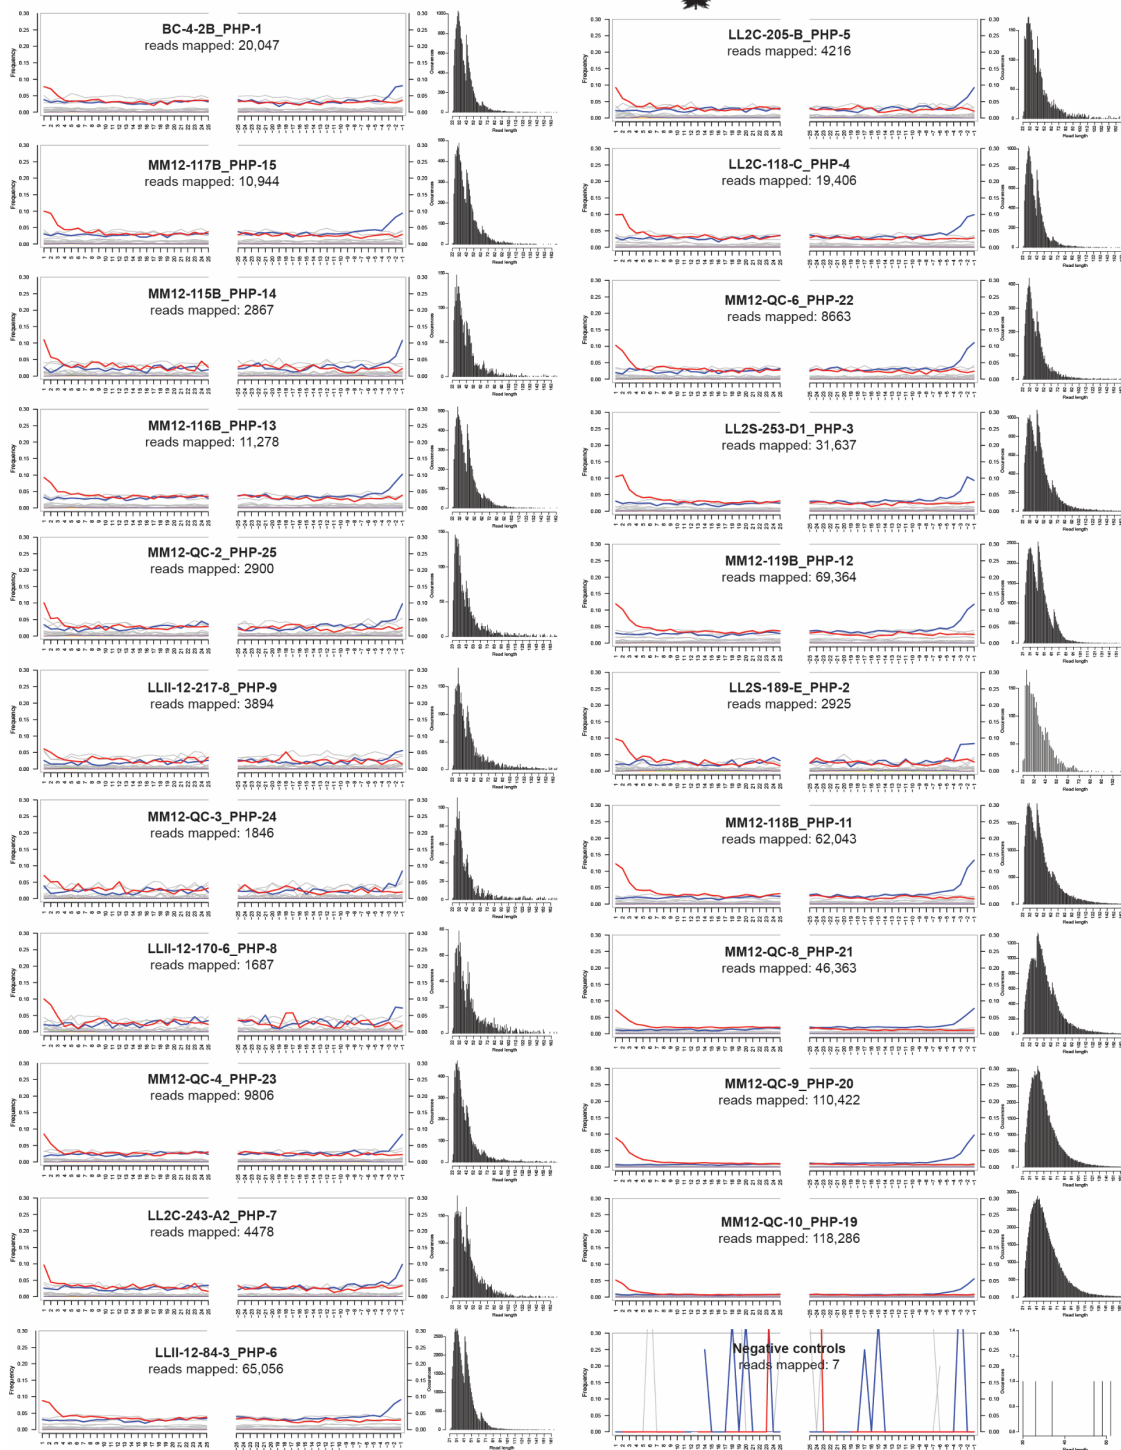

Supplementary Figure 28 *Picea glauca* mapDamage plots and fragment length distributions.  
[https://www.ncbi.nlm.nih.gov/nuccore/NC\\_028594](https://www.ncbi.nlm.nih.gov/nuccore/NC_028594)

### 2.5.5 Depurination and deamination rates

Several additional analyses were performed to assess whether the sequenced molecules had damage patterns characteristic of ancient DNA with a paired temporal or climatological signature. We expanded on the *mapDamage* analyses with reads mapped specifically to the *Salix interior* (sandbar willow) chloroplast reference genome (NC\_024681.1 [[https://www.ncbi.nlm.nih.gov/nuccore/NC\\_024681.1](https://www.ncbi.nlm.nih.gov/nuccore/NC_024681.1)]) as Salicaceae was identified in all samples (mean = 160,733 reads mapped per library; min = 2917; max = 1,211,599; std dev = 269,302). To note, sandbar willow is likely not the specific species of willow represented in this dataset. This *Salix* chloroplast genome was chosen because it is a curated NCBI reference sequence, and as it has been demonstrated that *Salix* readily hybridizes within the genus, limiting phylogenetic resolution at the species rank<sup>54</sup>.

We first assessed whether the mapping target was reasonably accurate by assessing the nucleotide mismatch distribution as denoted by a decreasing edit distance<sup>55</sup>. Mapped reads followed the expected pattern with the exception of samples PHP-5, 7–9, and 23 (Supplementary Figure 29). *Salix* was found to have the most consistent edit distance signal across time compared with alternative taxa within Poaceae and *Artemisia* despite some *Salix* mapped libraries with atypical distributions. The extent of DNA damage<sup>56</sup> was assessed using *mapDamage* v2.0<sup>53</sup>. Hydrolytic deamination, the erroneous replacement of nucleotides on the 5' and 3' ends of ancient DNA molecules, was assessed with fragment misincorporation plots (Supplementary Figure 30). Hydrolytic depurination, the fragmentation of DNA into short (20–60 bp) sections was assessed using fragment length distributions (FLD). These lengths will take the form of an exponential distribution and thus the depurination rate can be estimated as  $\lambda$  in the formula  $y = N \cdot e^{-\lambda \cdot x}$ <sup>57</sup>. This parameter was estimated using a modified version of a previously published script from Kistler et al.<sup>58</sup>.

We compared the rates of deamination and depuration against the modeled age estimates using multiple linear regressions by core sample and site. As the total amount of damage is expected to increase over time, a positive relationship between age and damage was hypothesized to be present. Further, mean temperature and annual precipitation have been shown to affect the rate of DNA damage<sup>58</sup>. While not exactly temperature or precipitation measurements,  $\delta^{18}\text{O}$  can serve as an excellent proxy as it is affected by these two variables<sup>59</sup>.

Single stranded deamination rates are roughly correlated with age, wherein older samples tend to have more deamination than those which are younger (Supplementary Figure 31). However, when comparing deamination rates to  $\delta^{18}\text{O}$ , we see a stronger correlation to temperature and hydrology wherein cores dating



to colder and drier periods have less deamination relative to those where the eDNA was released during warm and wet periods (Supplementary Figure 32). This is consistent with the results of Kistler et al.<sup>58</sup> who found that precipitation and temperature fluctuations contributed significantly to aDNA damage patterns, often irrespective of sample age. Depuration rates are also correlated with age wherein sedaDNA fragments tend to be shorter with older permafrost cores (Supplementary Figure 33). Deamination was found to be strongly correlated in a multivariate regression when the  $\delta^{18}\text{O}$  values at the time of eDNA release was paired with modelled age ( $R^2_{\text{adj}} = 0.4219$ ; p-value = 0.0112; F-statistic: 6.473 on 2 and 13 DF). Depurination rates by contrast were not significantly correlated with age and  $\delta^{18}\text{O}$  ( $R^2_{\text{adj}} = 0.1695$ ; p-value = 0.118; F-statistic: 2.531 on 2 and 13 DF).

The age and climate associated damage patterns observed here support the proposition that the bulk of eDNA recovered for our ecological reconstructions are roughly contemporaneous with the age-modelled dates for these cores. This supports both the timings of ecological turnover, and the late persistence of *Mammuthus* and *Equus* sedaDNA to the early and mid-Holocene.

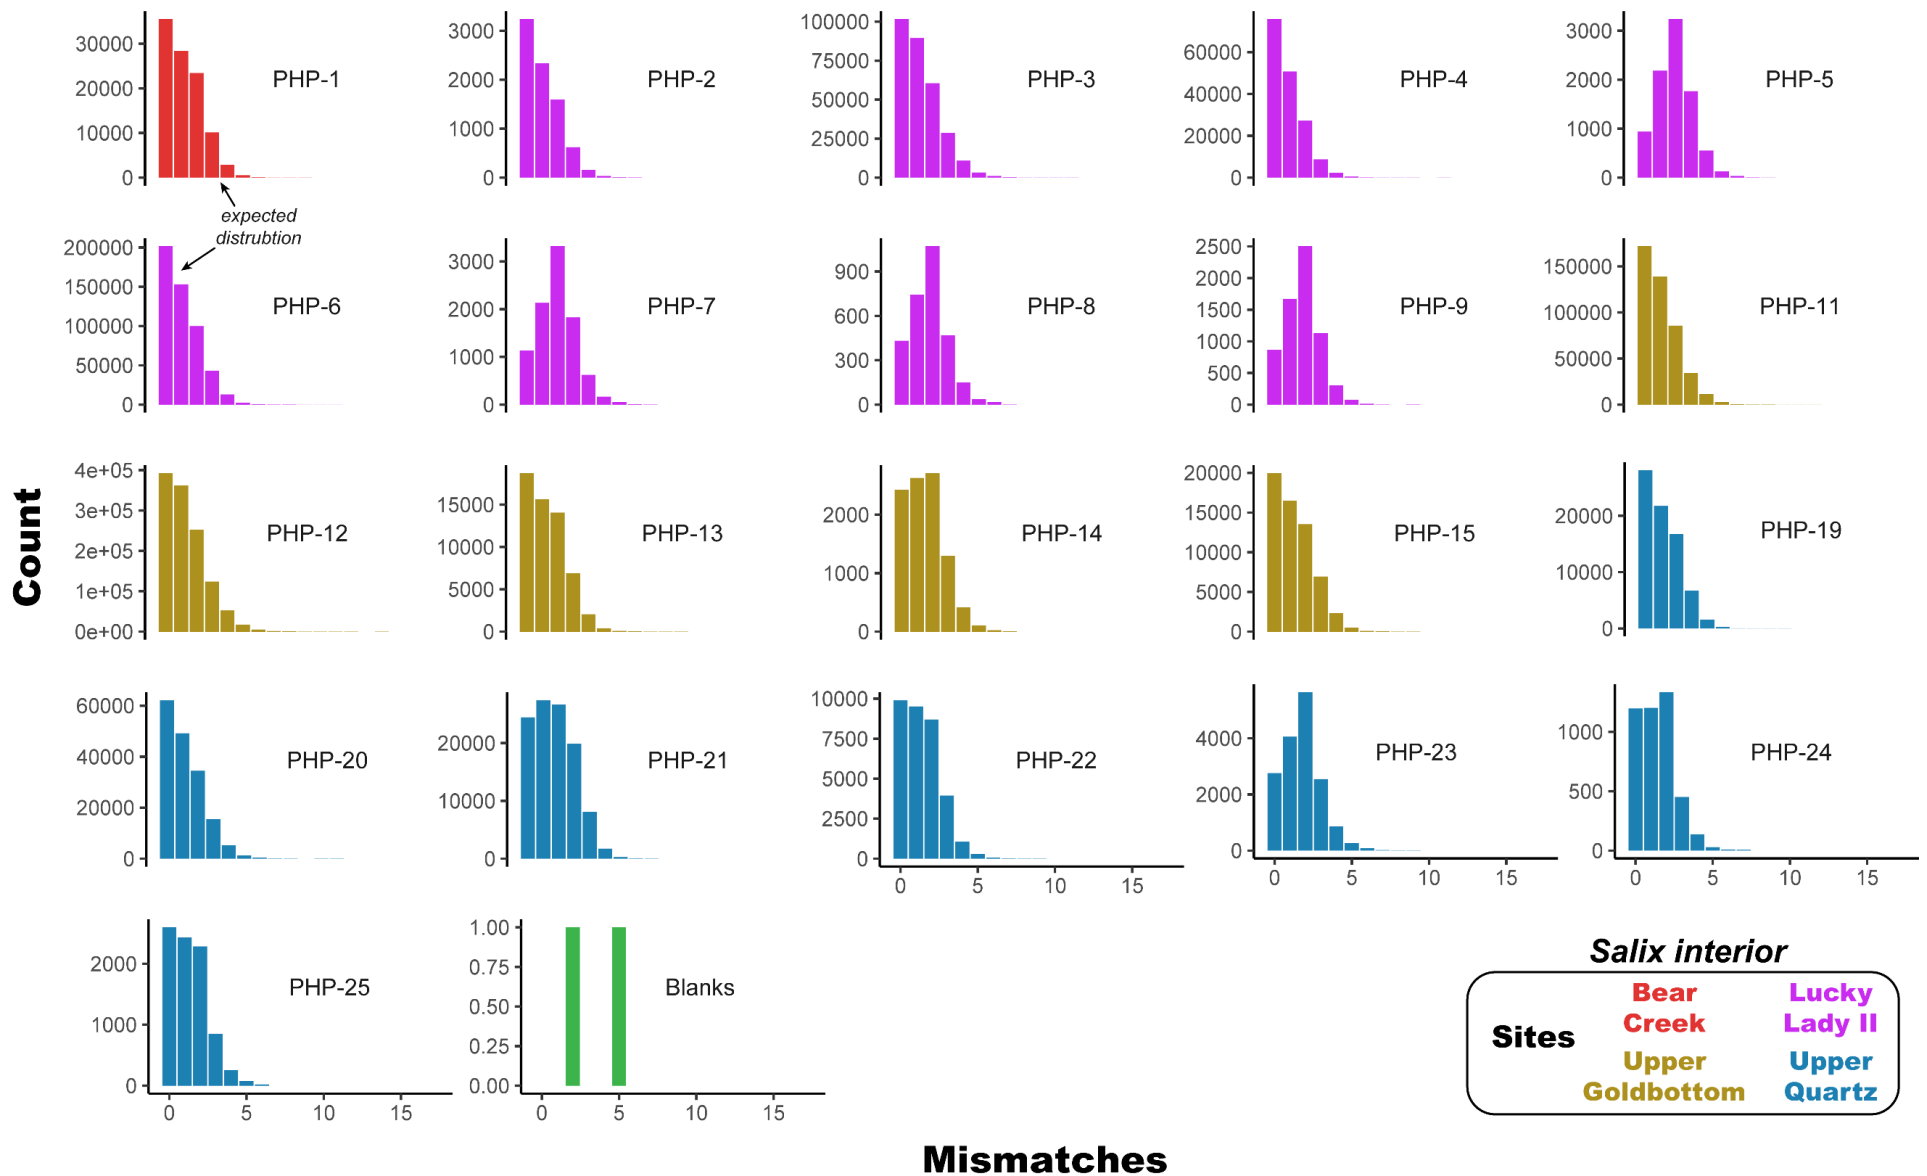

**Supplementary Figure 29** Plotted edit distances for reads mapped to the *Salix interior* chloroplast reference genome (NC\_024681.1). PHP-5,7–9, and 23 have atypical edit distance distributions indicating that there is abundant off-target mapping to this reference, which may impact deamination/depuration rate estimates.

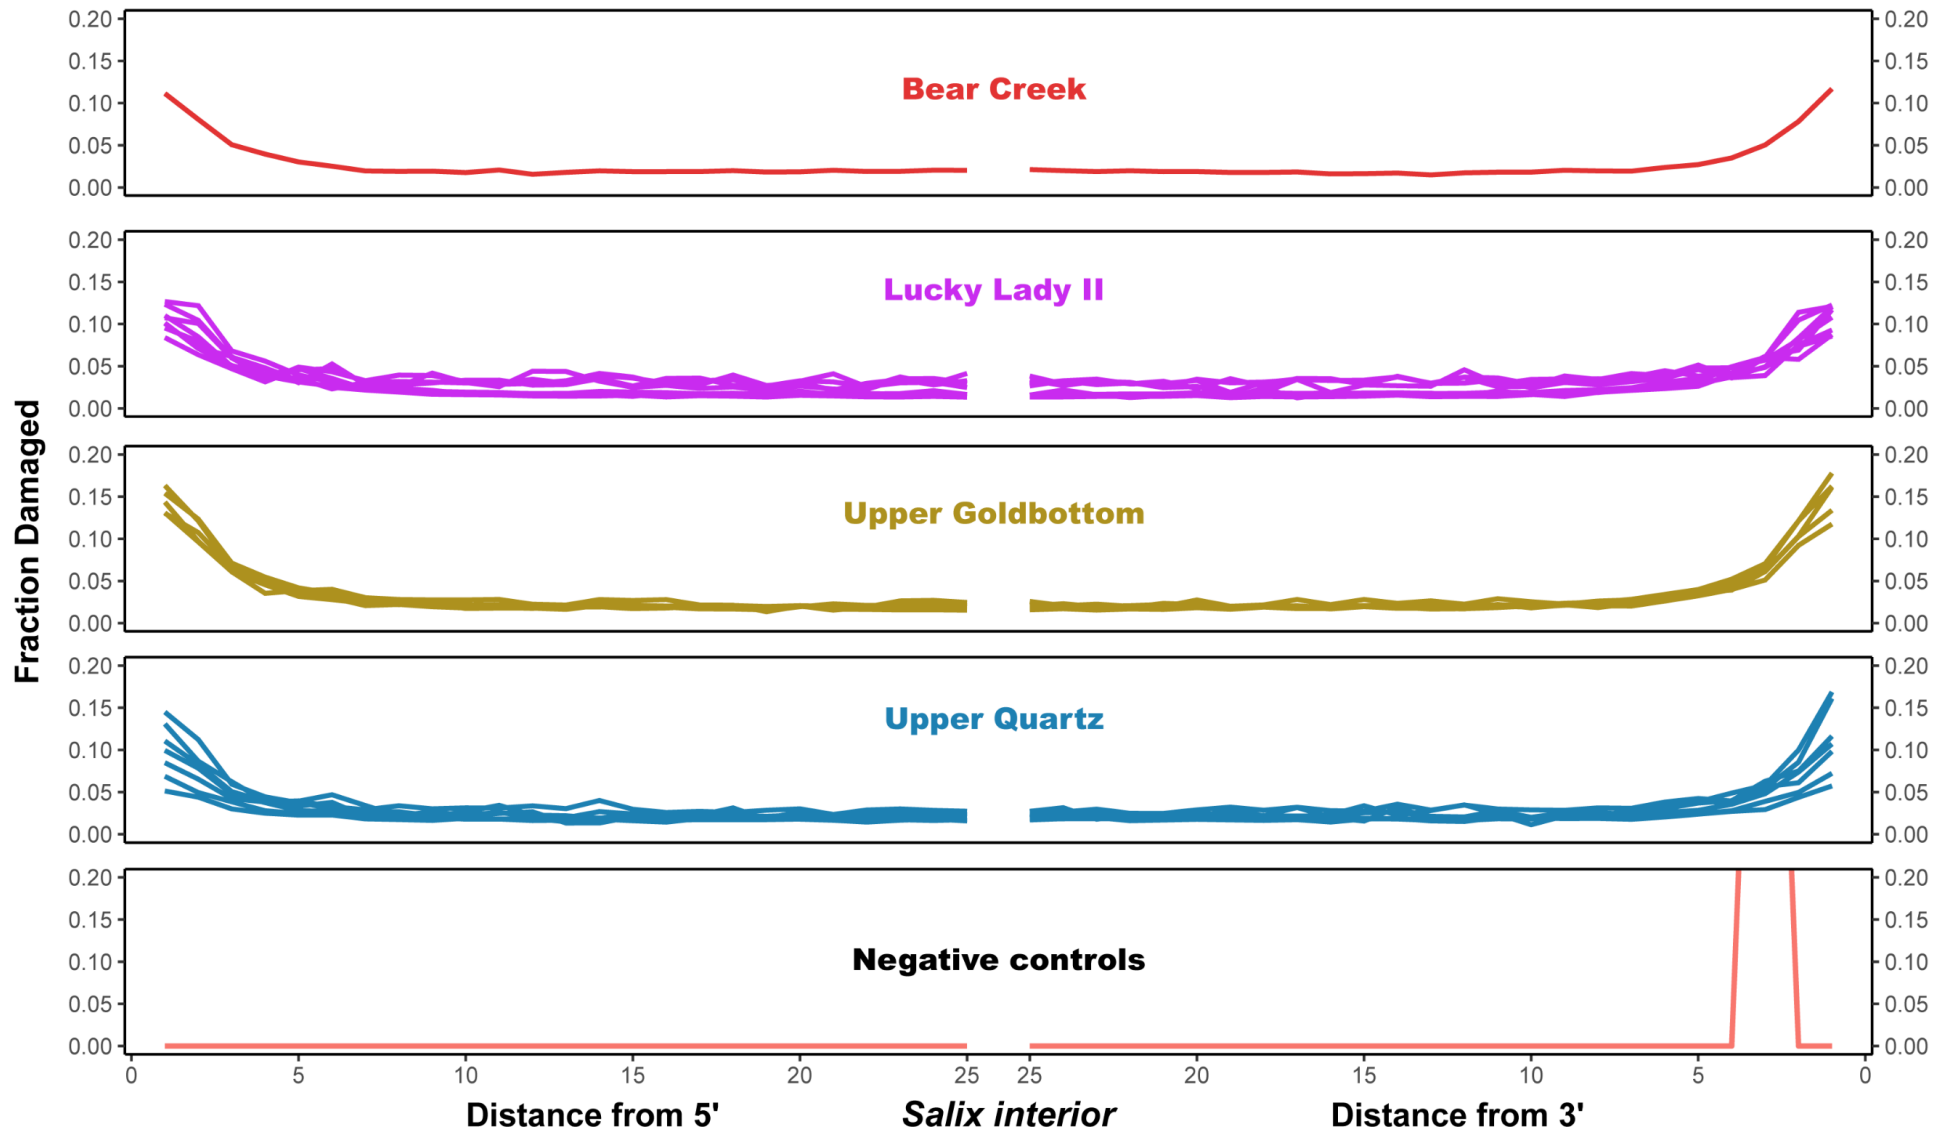

**Supplementary Figure 30** Fragment misincorporation plots to confirm the presence of hydrolytic deamination for reads mapped to the *Salix interior* chloroplast reference genome (NC\_024681.1). All libraries show characteristic ancient DNA damage patterns.

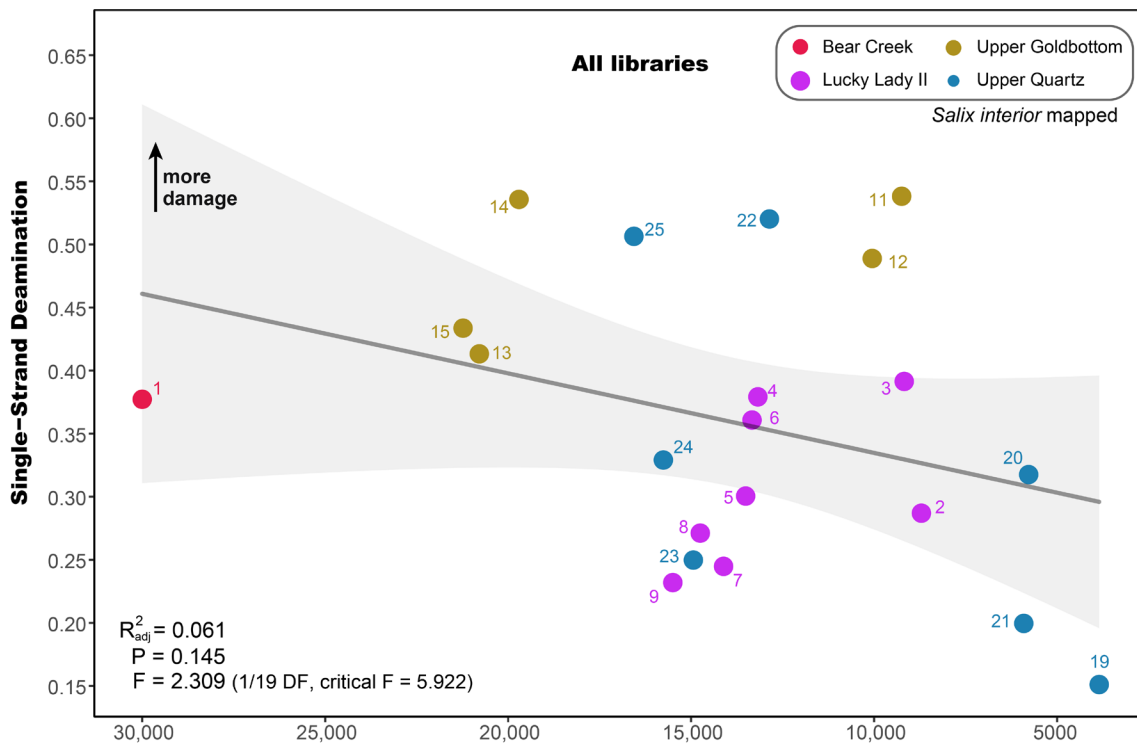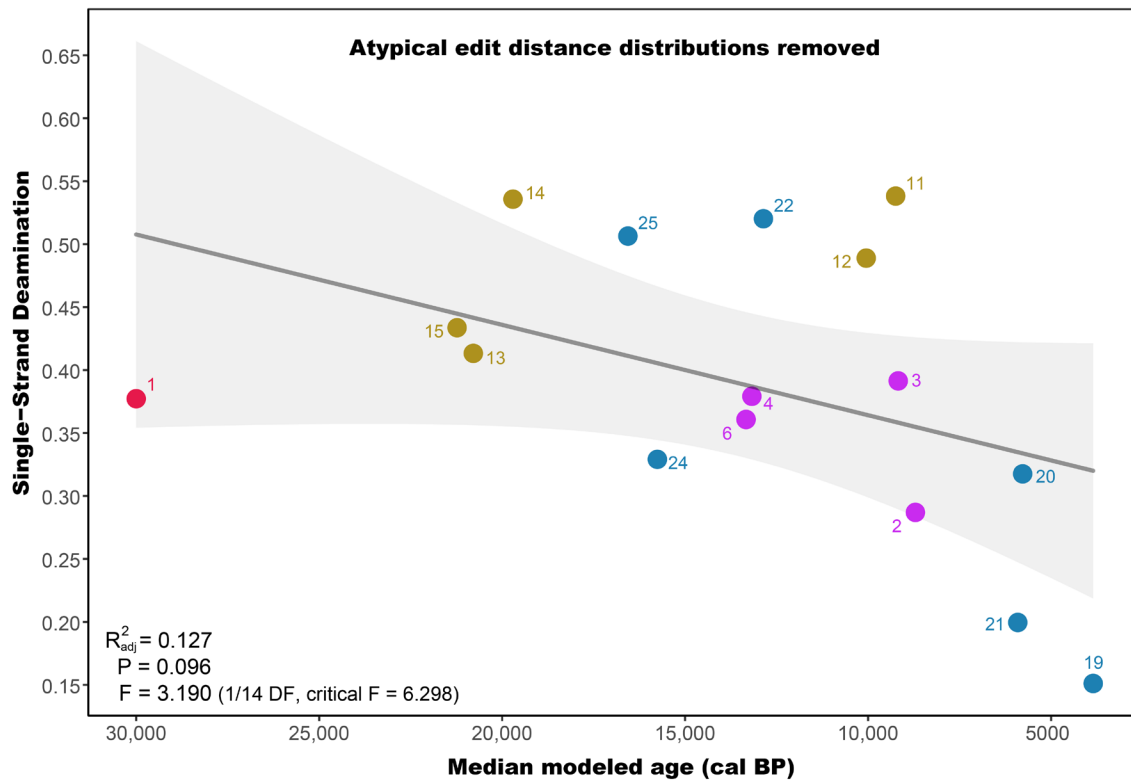

**Supplementary Figure 31** Deamination rate of *Salix interior* mapped reads against time. **A)** All libraries included (n=21). **B)** Reads with atypical edit distance distributions removed (n=16). Shaded region = 95% confidence interval. P-values from a two-sided F-test of the linear regression model.

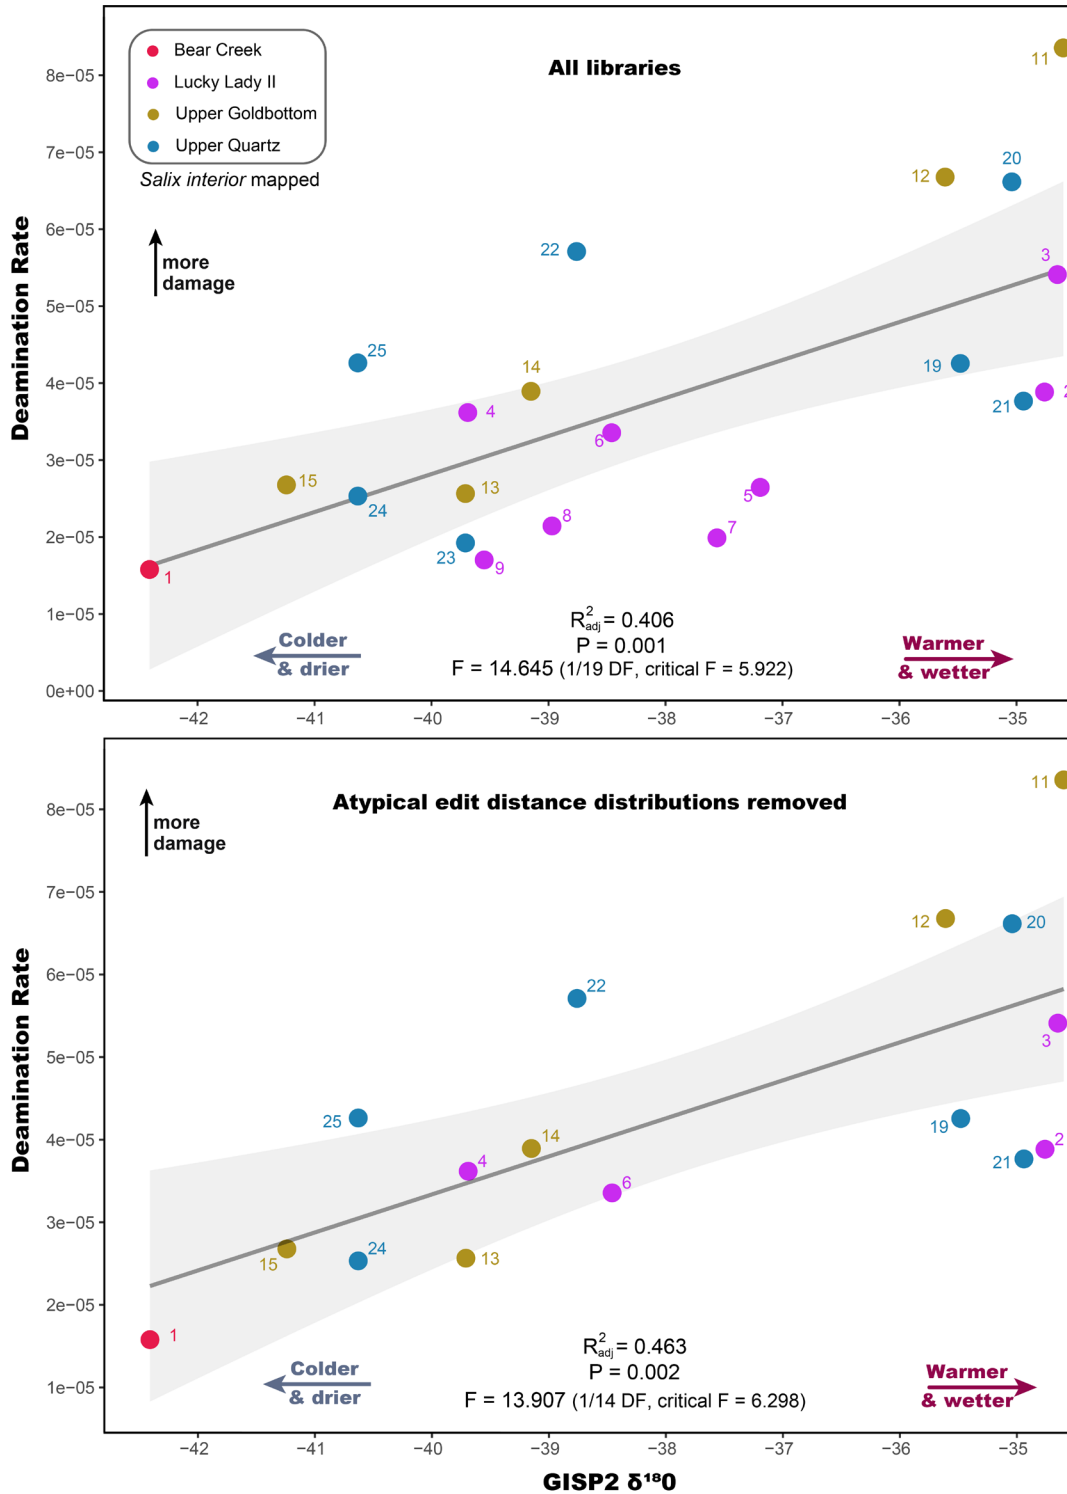

**Supplementary Figure 32** Deamination rate of *Salix interior* mapped reads compared with the temporally nearest Greenland Ice Sheet Project 2 (GISP2) oxygen-18 isotope value<sup>62</sup>. A) All libraries included (n=21). B) Atypical edit distance libraries removed (n=16). Shaded region = 95% confidence interval. P-values from a two-sided F-test of the linear regression model.

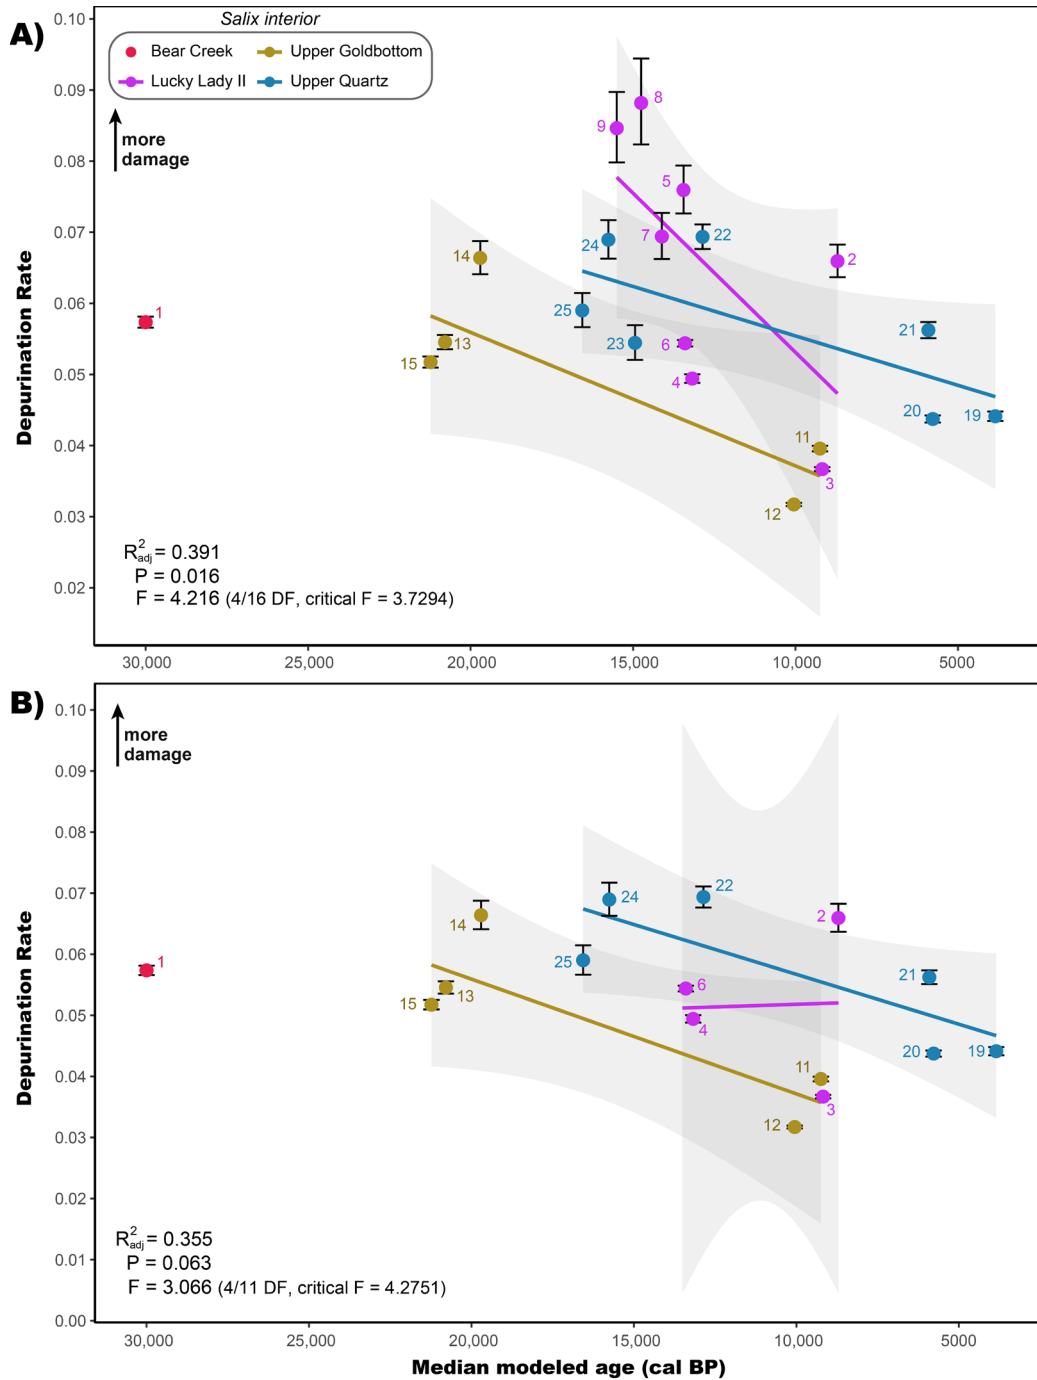

**Supplementary Figure 33** Depurination rate of *Salix interior* mapped reads against time.

A) All libraries included (n=21). B) Reads with atypical edit distance distributions removed (n=16). Shaded region = 95% confidence interval. P-values from a two-sided F-test of the linear regression model. Note: PHP-2 is an outlier in the metagenomic data with exceptionally poor sedaDNA preservation (no faunal DNA were identified). When this library is removed from panel B, the model becomes significantly correlated ( $R^2_{adj} = 0.620$ ,  $P = 0.007$ ,  $F = 6.716$  (4/10 DF, critical F = 4.468)).

### 2.5.6 Taxonomic binning replicate comparison between MEGAN and PIA

This section includes a taxonomic binning breakdown of subsampled replicates across batches. We observe a consistency between replicates in terms of their taxonomic compositions. We also observe that while the *PIA* taxonomic binning approach may be effective in reducing the potential for false-positive hits, it is too conservative to be of direct utility with this dataset. We utilized the top 600 *BLASTn* hits (100 more hits retained than recommended by the *PIA* developers<sup>60</sup>, but still observe in many instances that all 600 hits are for the same or very closely related organisms. In these instances, *PIA* drops the read entirely assuming that this portion of the database is lacking in references aside from a set of over-represented ‘oasis’ taxa, irrespective of the taxonomic accuracy. Overall, this results in substantial data loss compared with *MEGAN*. We suspect that this limitation could be avoided by returning as many as the top 1500+ hits, but our blast files were already almost unwieldy with 600 hits. Some individual blast files are over 200 gigabytes, and in total the post-filtering dataset is approximately 3 terabytes in size. These limitations could likely be avoided by utilizing a taxonomically non-redundant or otherwise manually curated reference database, but these options may bias taxonomic binning to only organisms one expects to find. A *BLASTn* or similar alignment approach that had the option to collapse accession hits based on Taxonomy ID up to a certain threshold and could instead return the top 500+ Taxonomic ID hits would help alleviate the challenges of metagenomic noise observed here and in Murchie et al.<sup>48</sup>. We also observed that there is utility in an ensemble *PIA* and *MEGAN* approach insofar as it provides a sanity check for taxonomic binning of rare or unexpected taxa. The flexibility and power of *MEGAN* with its customizable LCA and comprehensive GUI was found to be highly effective with this dataset, with limitations in *BLASTn* customization being the limiting factor.

SedaDNA ID: PHP-1  
 Core: BC 4-2B  
 ~cal yr BP: 30,000

**PIA**

• Min coverage = 95%  
 • Min taxonomic diversity score: 0.1

**BLASTn Parameters**

• Top 600 hits  
 • Max Expected 1.0E-5

**MEGAN**

• Min Score = 50  
 • Min Percent Identity = 95  
 • Top Percent = 20  
 • Min Unique Reads = 3  
 • Weighted LCA at 80%

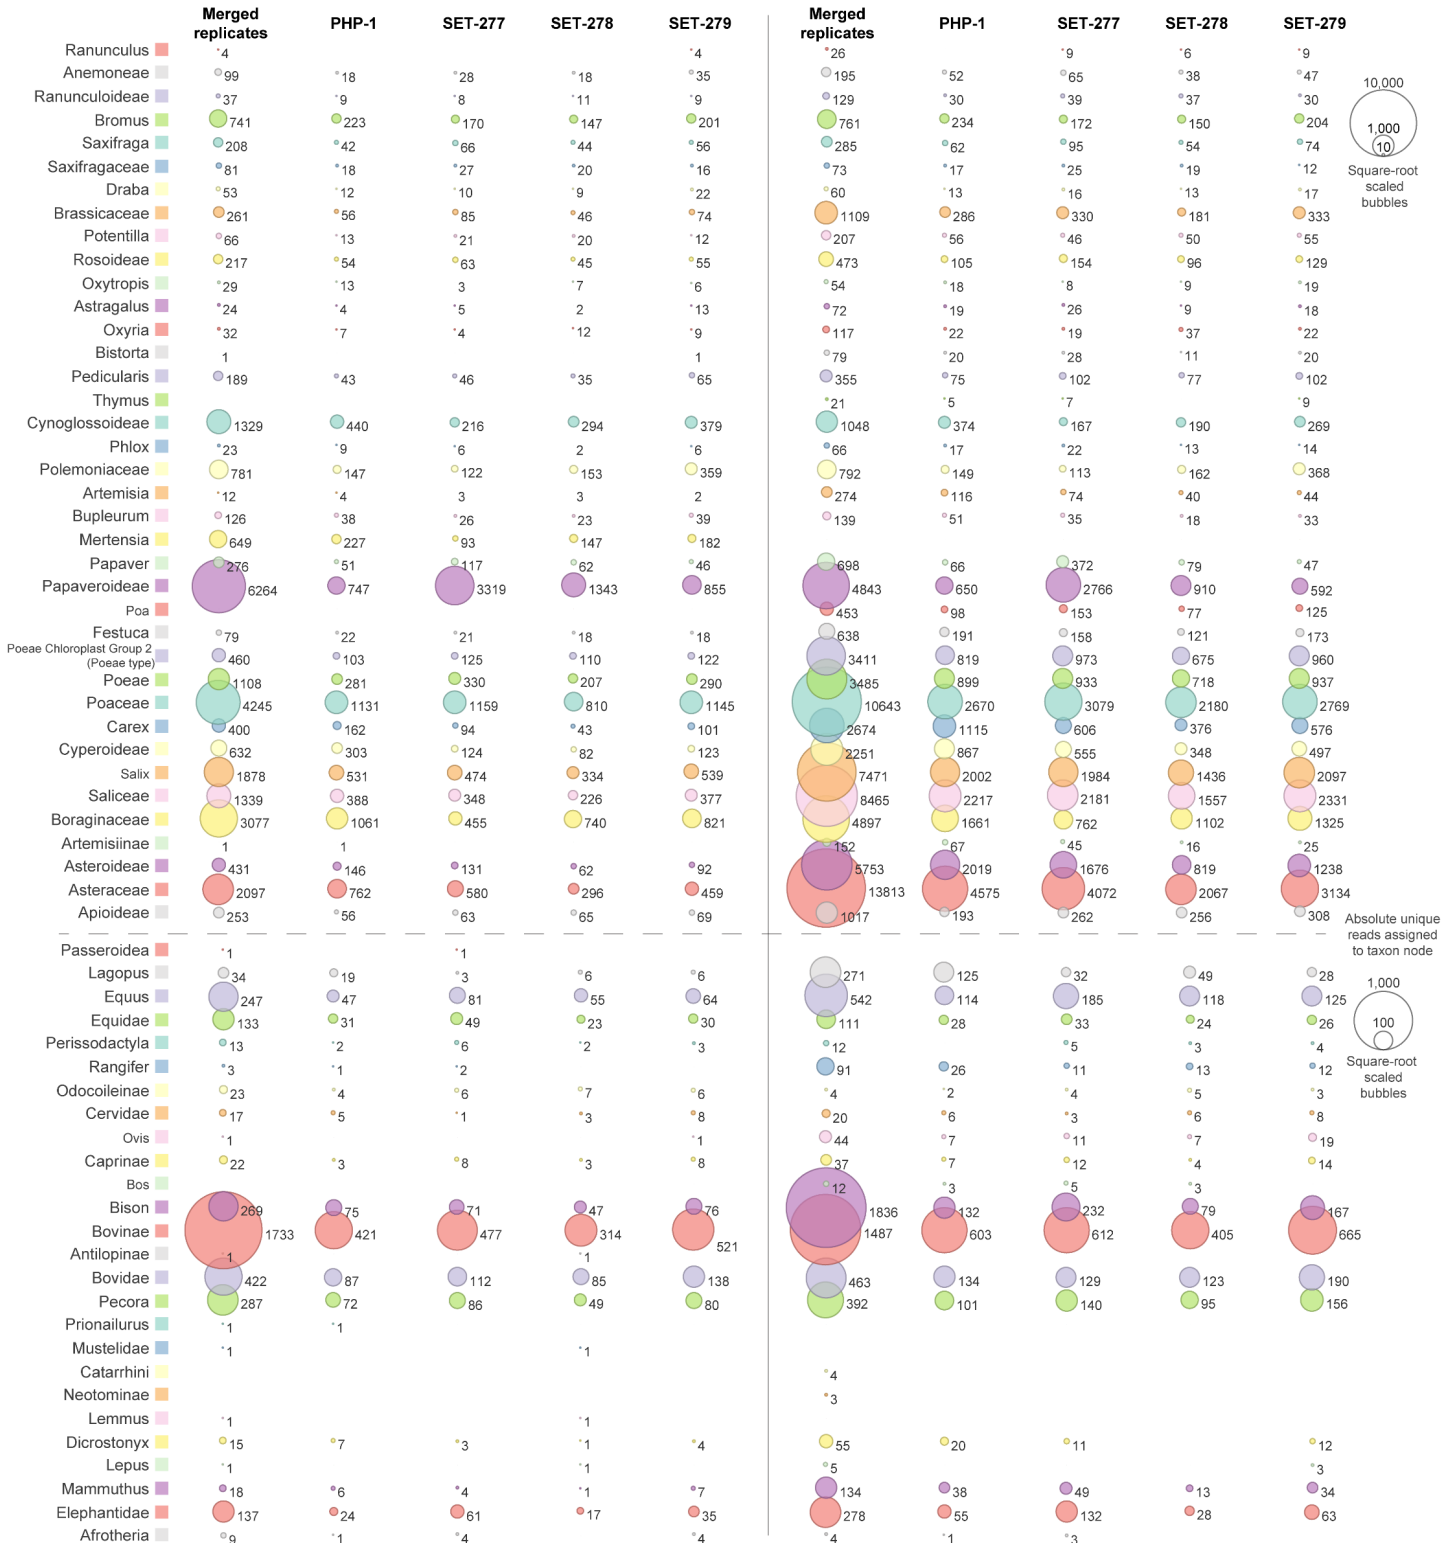

**Supplementary Figure 34** PHP-1 replicates comparison with *PIA* and *MEGAN* taxonomic binning. Select nodes depicted.



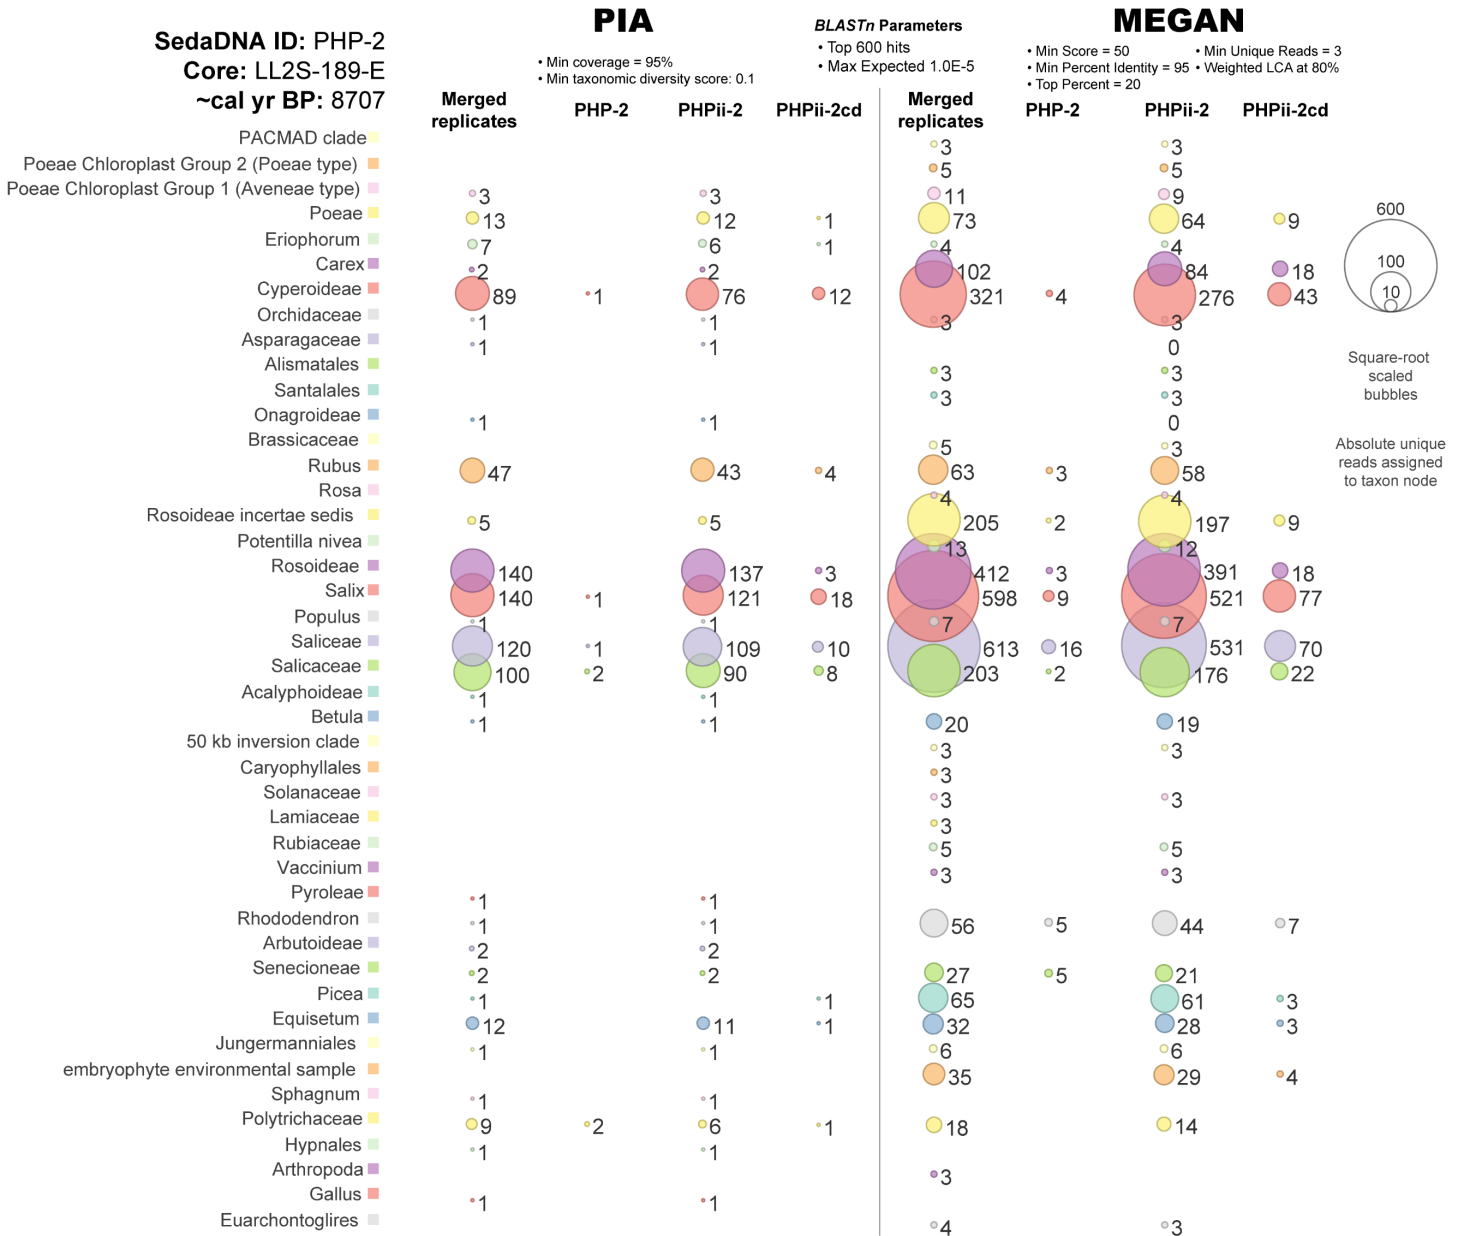

**Supplementary Figure 35** PHP-2 replicates comparison with *PIA* and *MEGAN* taxonomic binning. Select nodes depicted.

SedaDNA ID: PHP-3  
 Core: LL2S-253-D1  
 ~cal yr BP: 9177

**PIA**

• Min coverage = 95%  
 • Min taxonomic diversity score: 0.1

**BLASTn Parameters**

• Top 600 hits  
 • Max Expected 1.0E-5

**MEGAN**

• Min Score = 50  
 • Min Unique Reads = 3  
 • Min Percent Identity = 95  
 • Weighted LCA at 80%  
 • Top Percent = 20

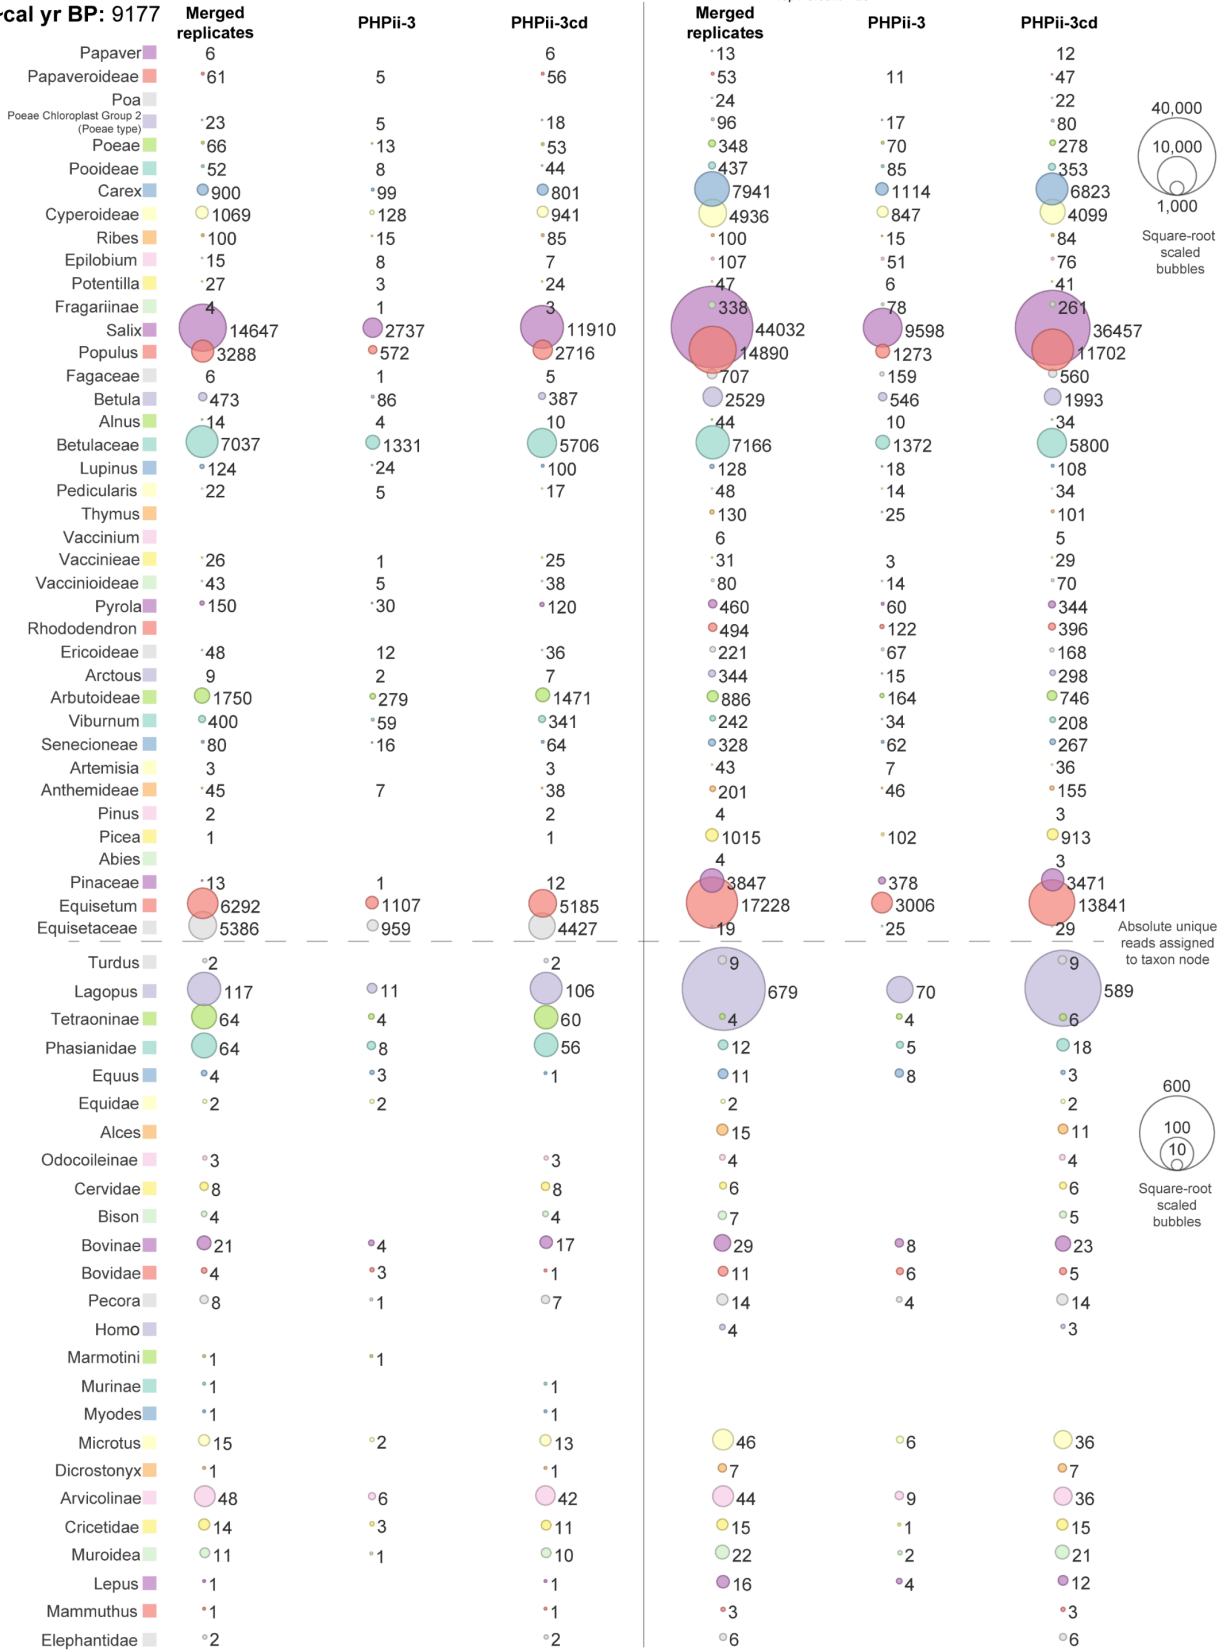

Supplementary Figure 36 PHP-3 replicates comparison with PIA and MEGAN taxonomic binning. Select nodes depicted.

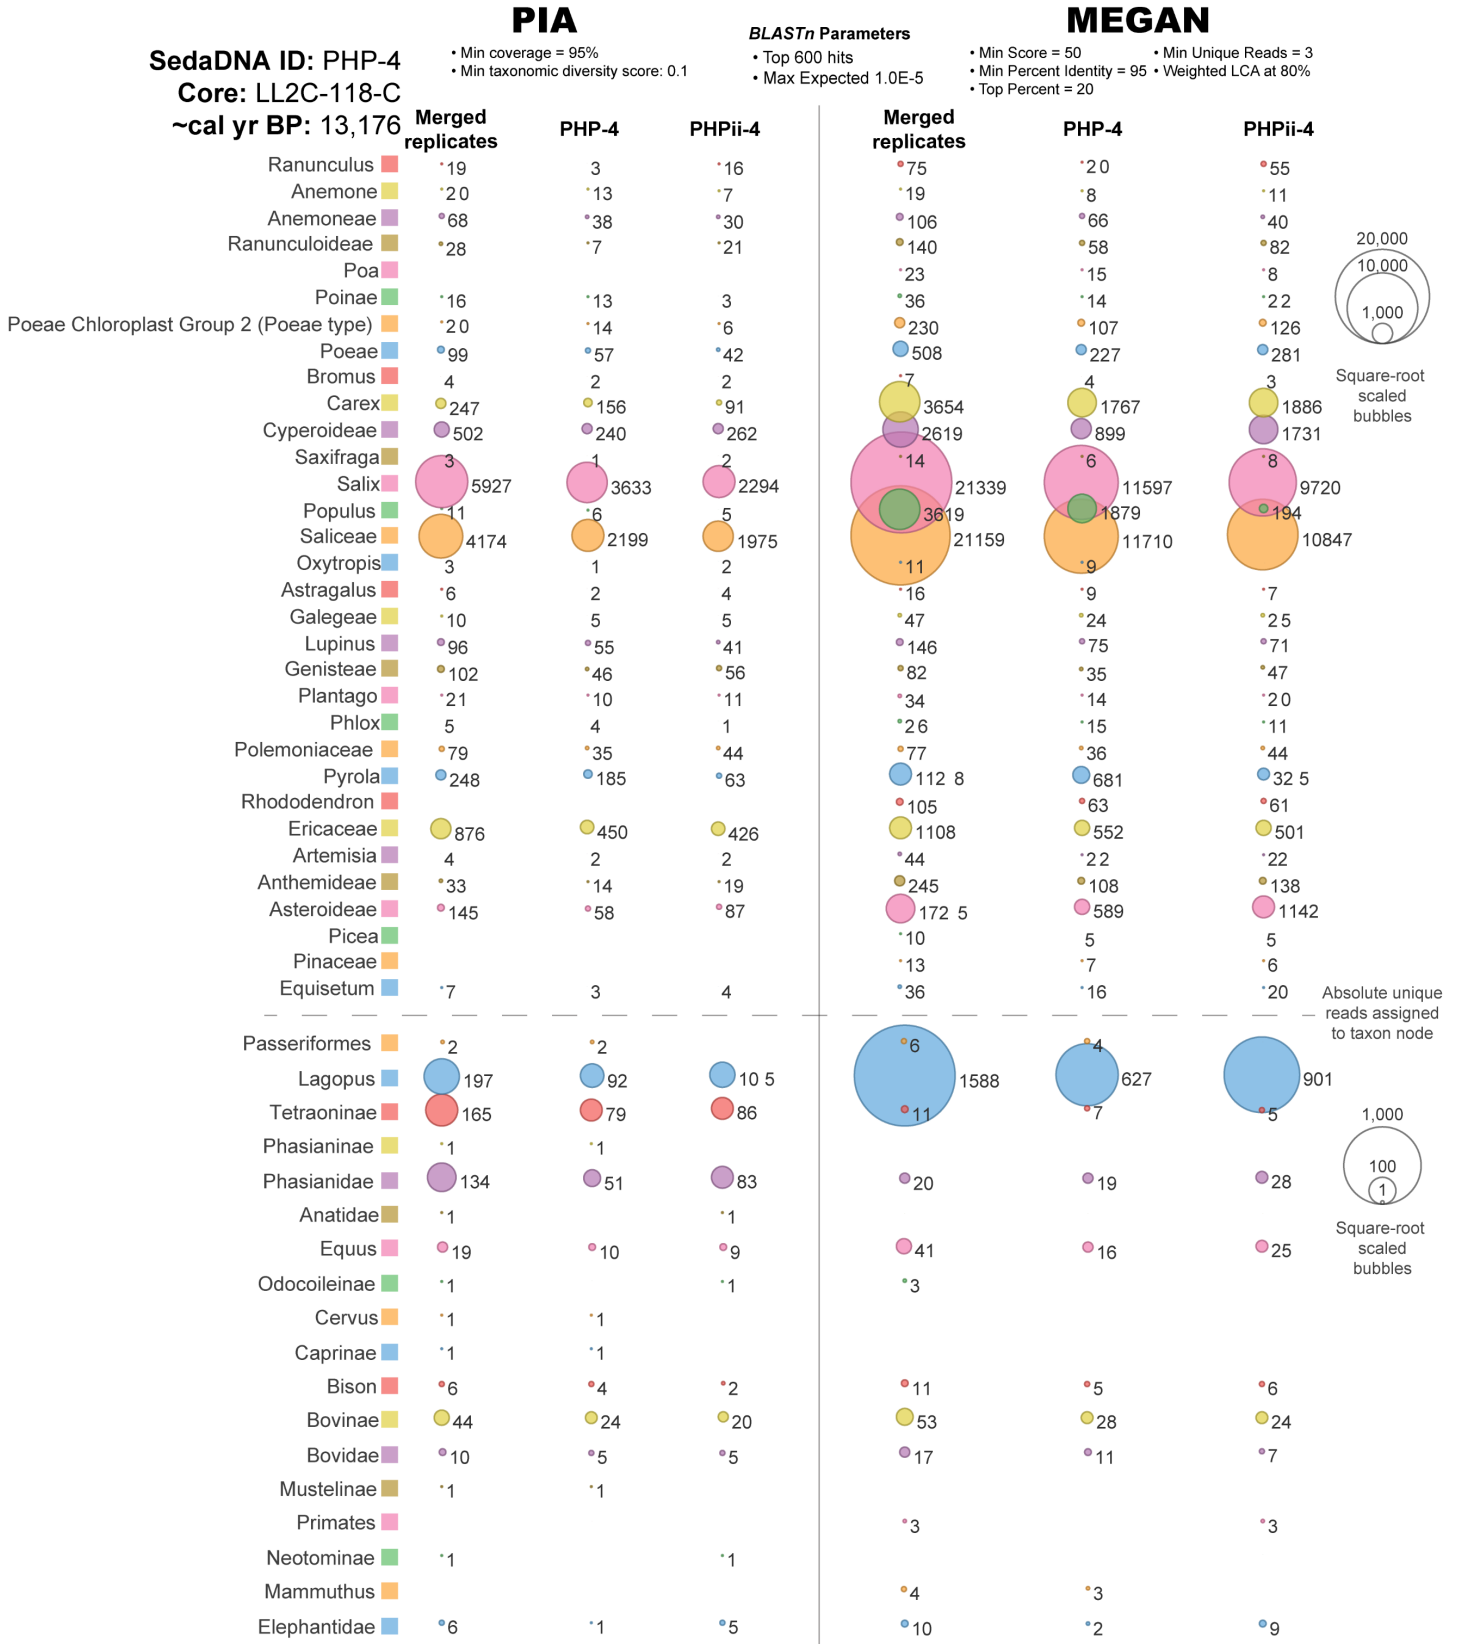

**Supplementary Figure 37** PHP-4 replicates comparison with *PIA* and *MEGAN* taxonomic binning. Select nodes depicted.

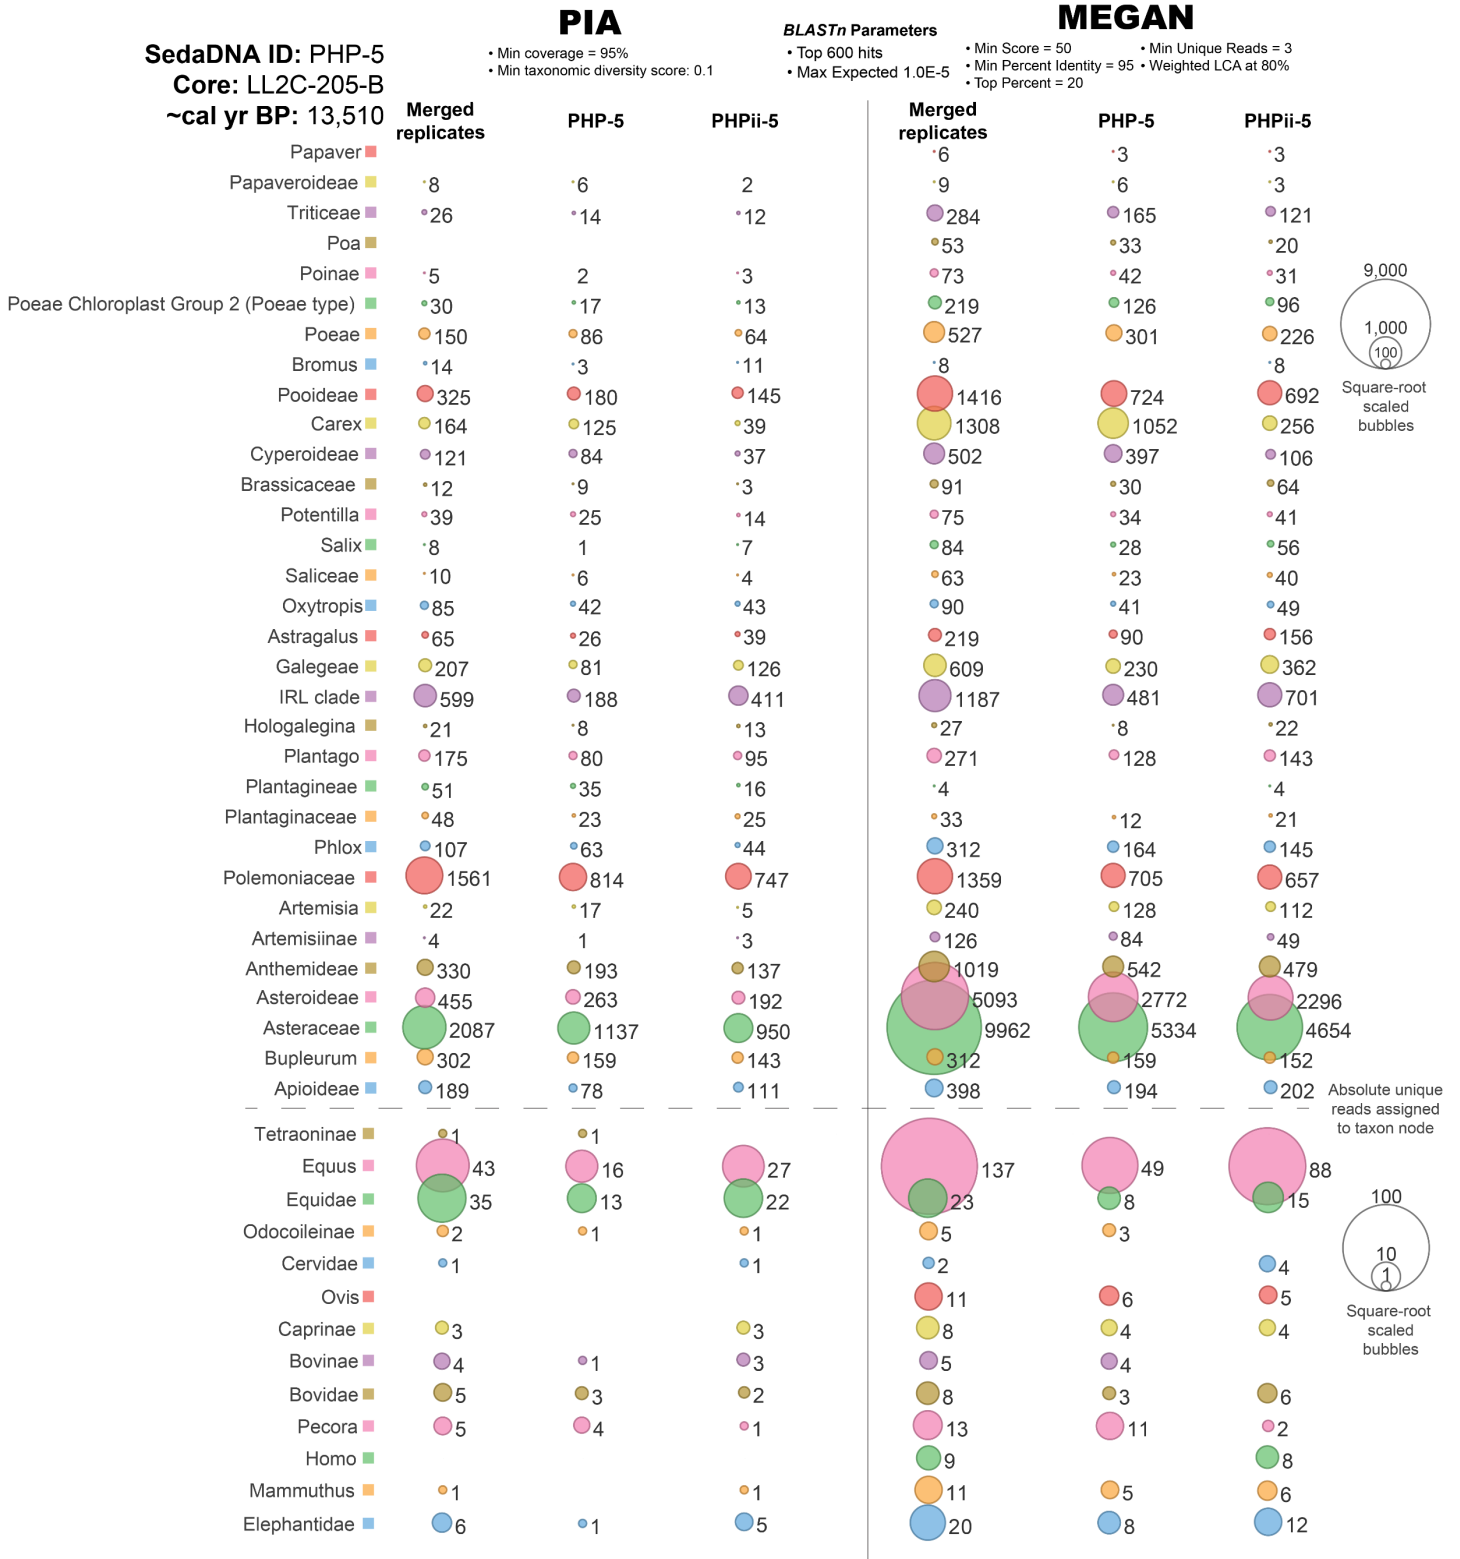

**Supplementary Figure 38** PHP-5 replicates comparison with *PIA* and *MEGAN* taxonomic binning. Select nodes depicted.

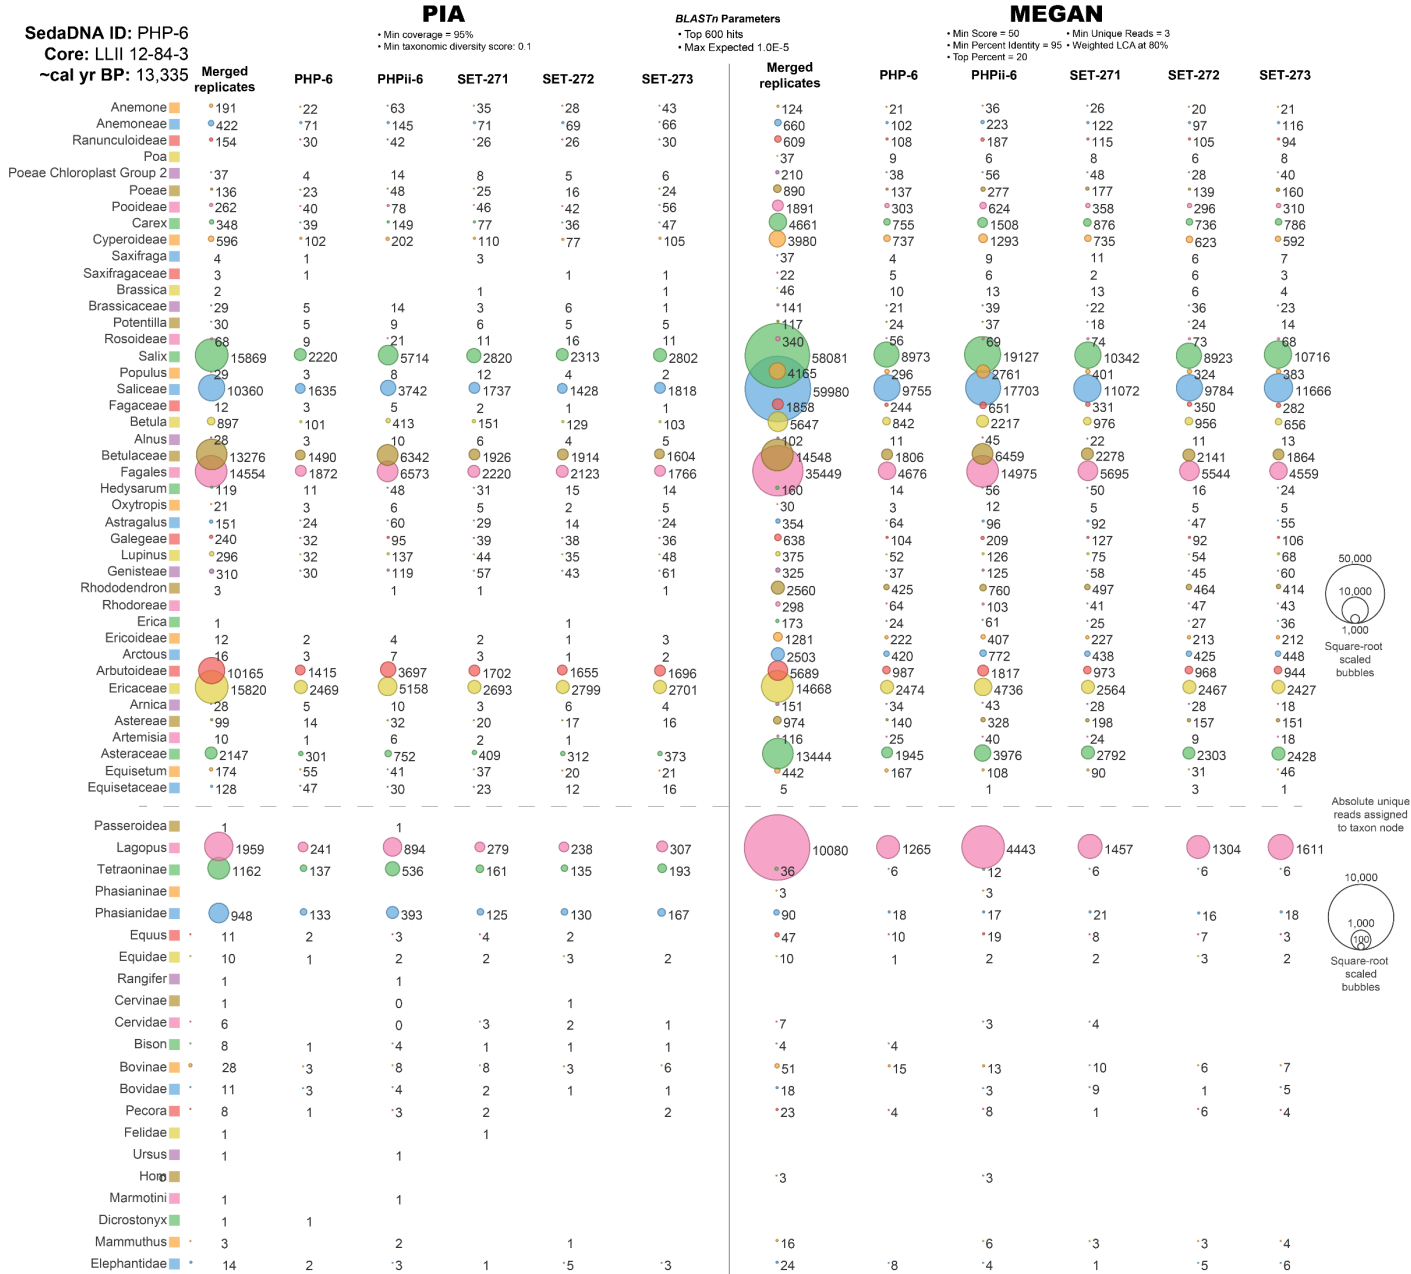

**Supplementary Figure 39** PHP-6 replicates comparison with *PIA* and *MEGAN* taxonomic binning. Select nodes depicted.

SedaDNA ID: PHP-7  
 Core: LL2C-243-A2  
 ~cal yr BP: 14,113

**PIA**

- Min coverage = 95%
- Min taxonomic diversity score: 0.1

**BLASTn Parameters**

- Top 600 hits
- Max Expected 1.0E-5
- Min Score = 50
- Min Unique Reads = 3
- Min Percent Identity = 95
- Weighted LCA at 80%
- Top Percent = 20

**MEGAN**

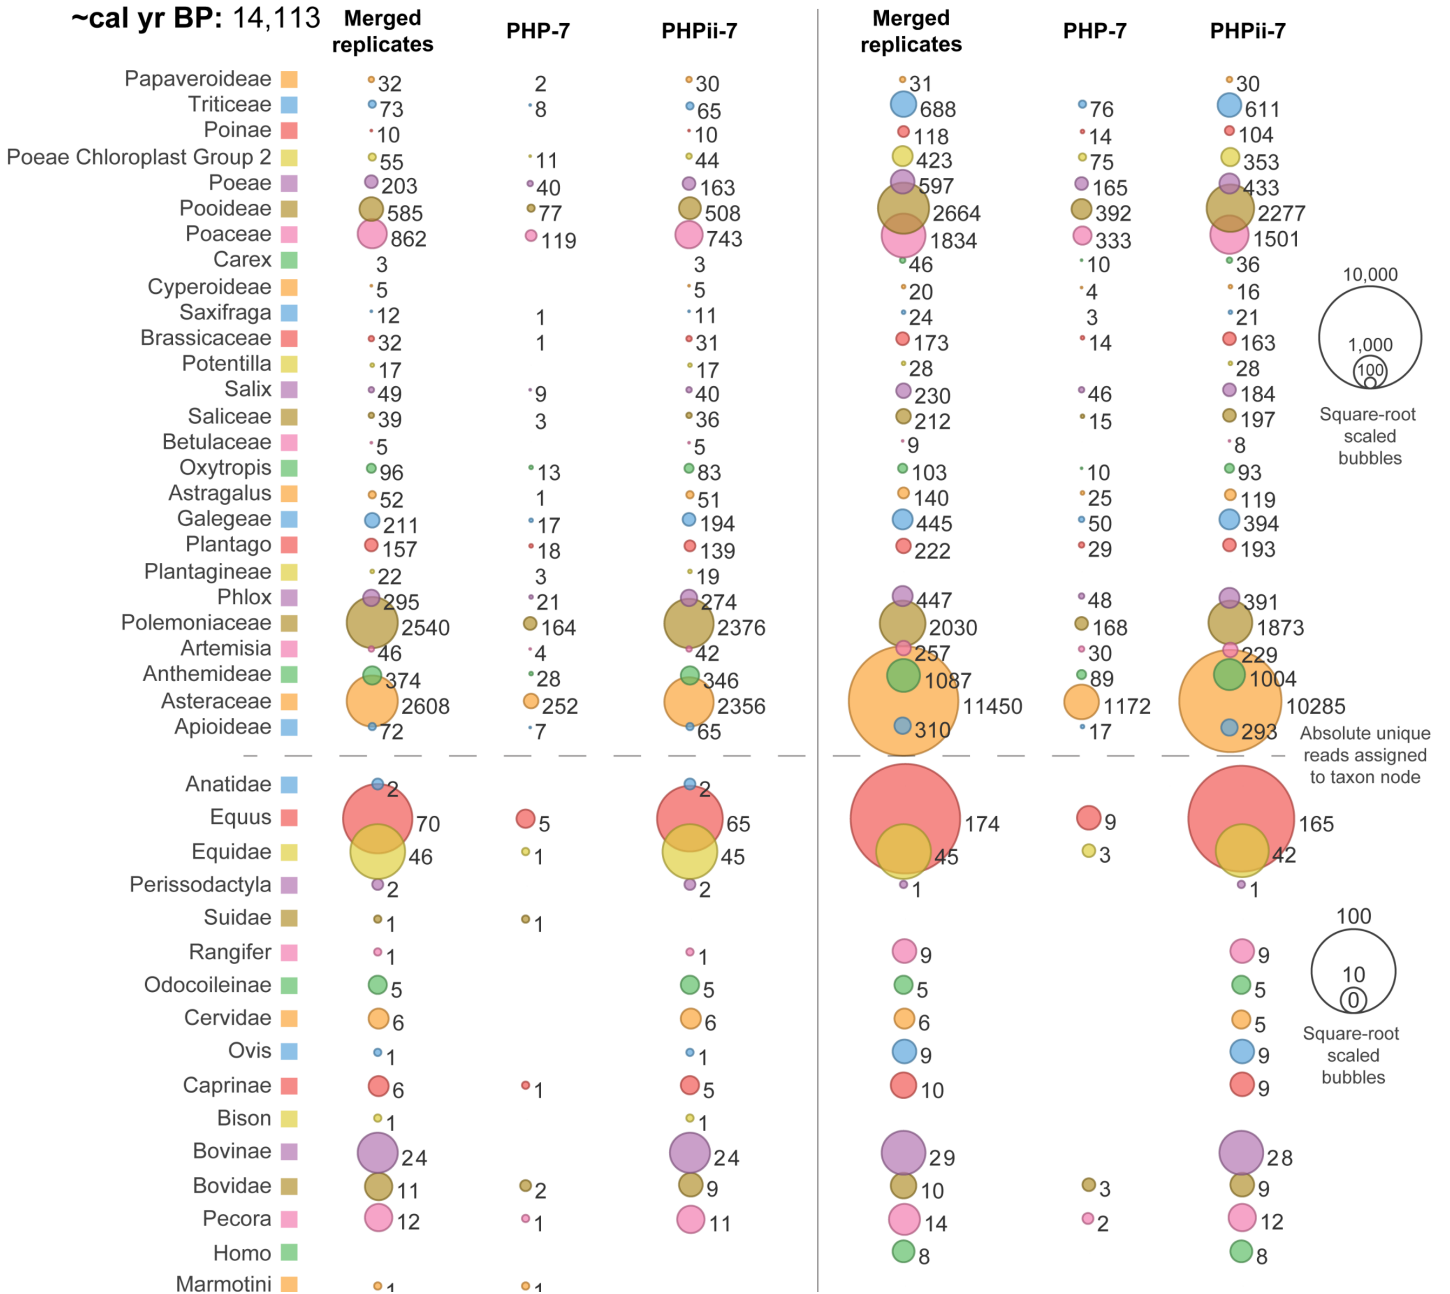

Supplementary Figure 40 PHP-7 replicates comparison with PIA and MEGAN taxonomic binning.

**BLASTn Parameters**

- Top 600 hits
- Max Expected 1.0E-5

**SedaDNA ID: PHP-8**  
**Core: LLII-12-170-6**  
**~cal yr BP: 14,750**

**PIA**

- Min coverage = 95%
- Min taxonomic diversity score: 0.1

**MEGAN**

- Min Score = 50
- Min Unique Reads = 3
- Min Percent Identity = 95
- Weighted LCA at 80%
- Top Percent = 20

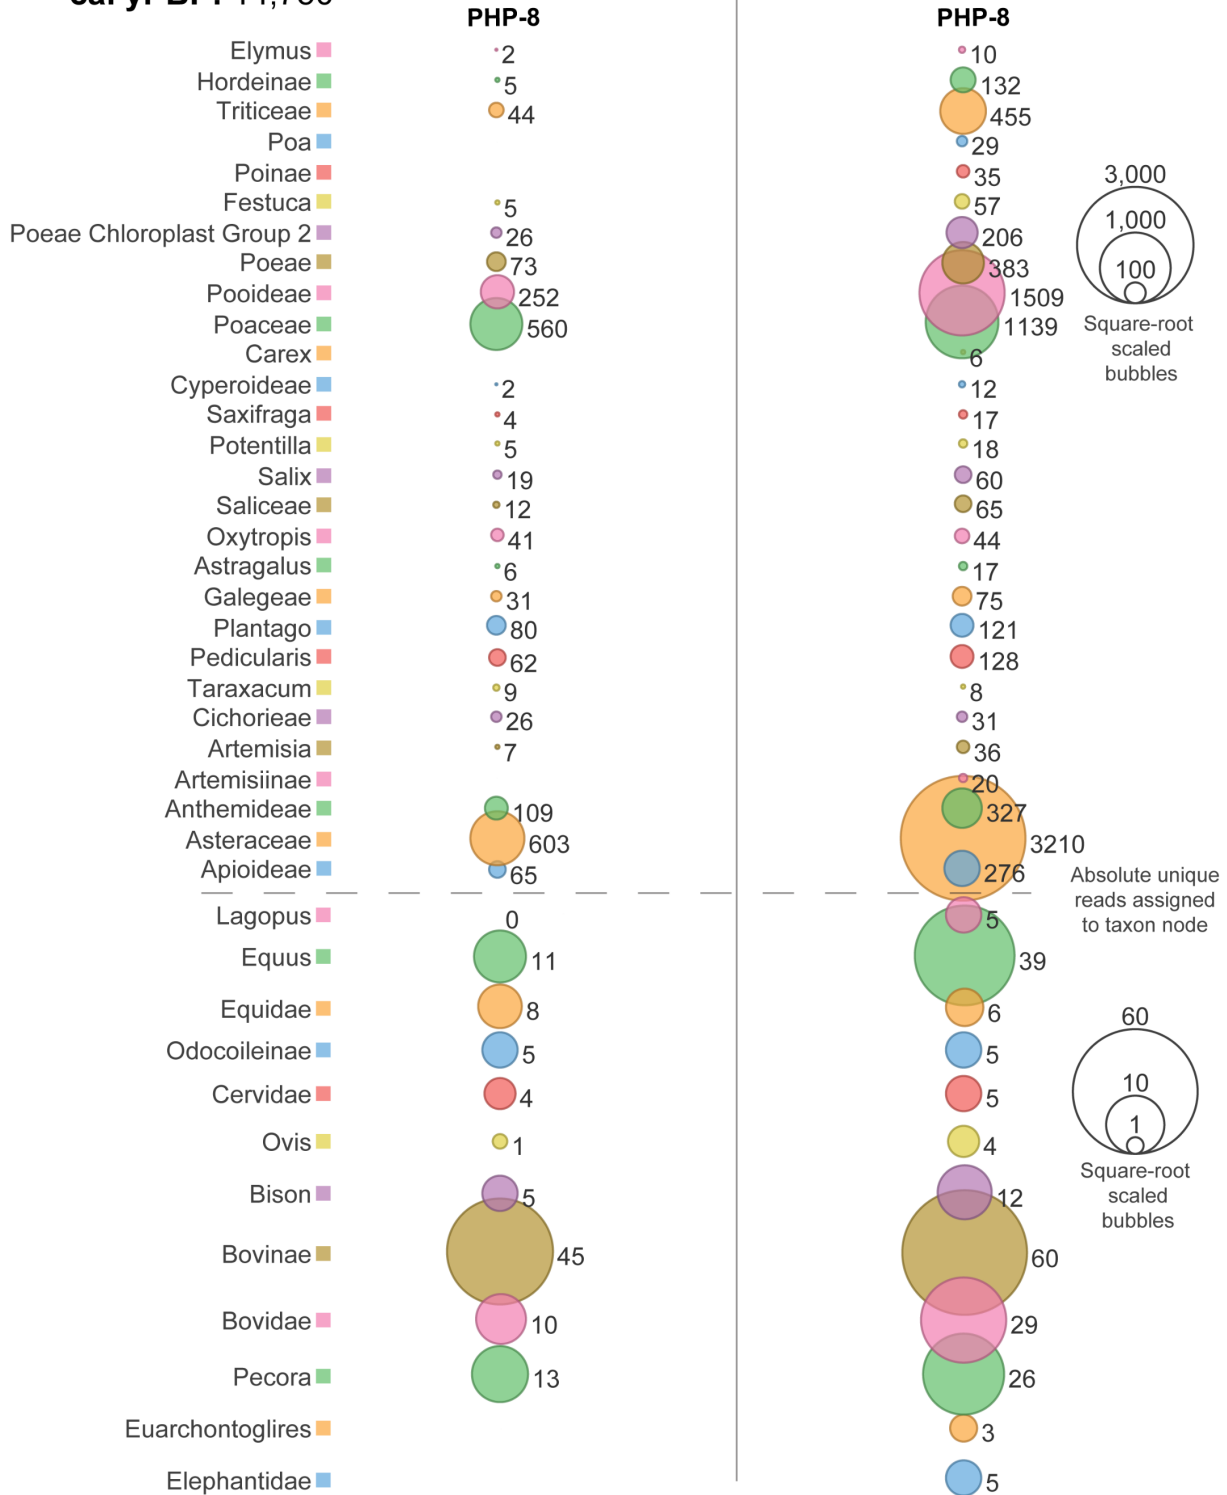

**Supplementary Figure 41** PHP-8 replicates comparison with *PIA* and *MEGAN* taxonomic binning. Select nodes depicted.

SedaDNA ID: PHP-9  
 Core: LLII-12-217-8  
 ~cal yr BP: 15,865

**PIA**

• Min coverage = 95%  
 • Min taxonomic diversity score: 0.1

**BLASTn Parameters**

• Top 600 hits  
 • Max Expected 1.0E-5

**MEGAN**

• Min Score = 50 • Min Unique Reads = 3  
 • Min Percent Identity = 95 • Weighted LCA at 80%  
 • Top Percent = 20

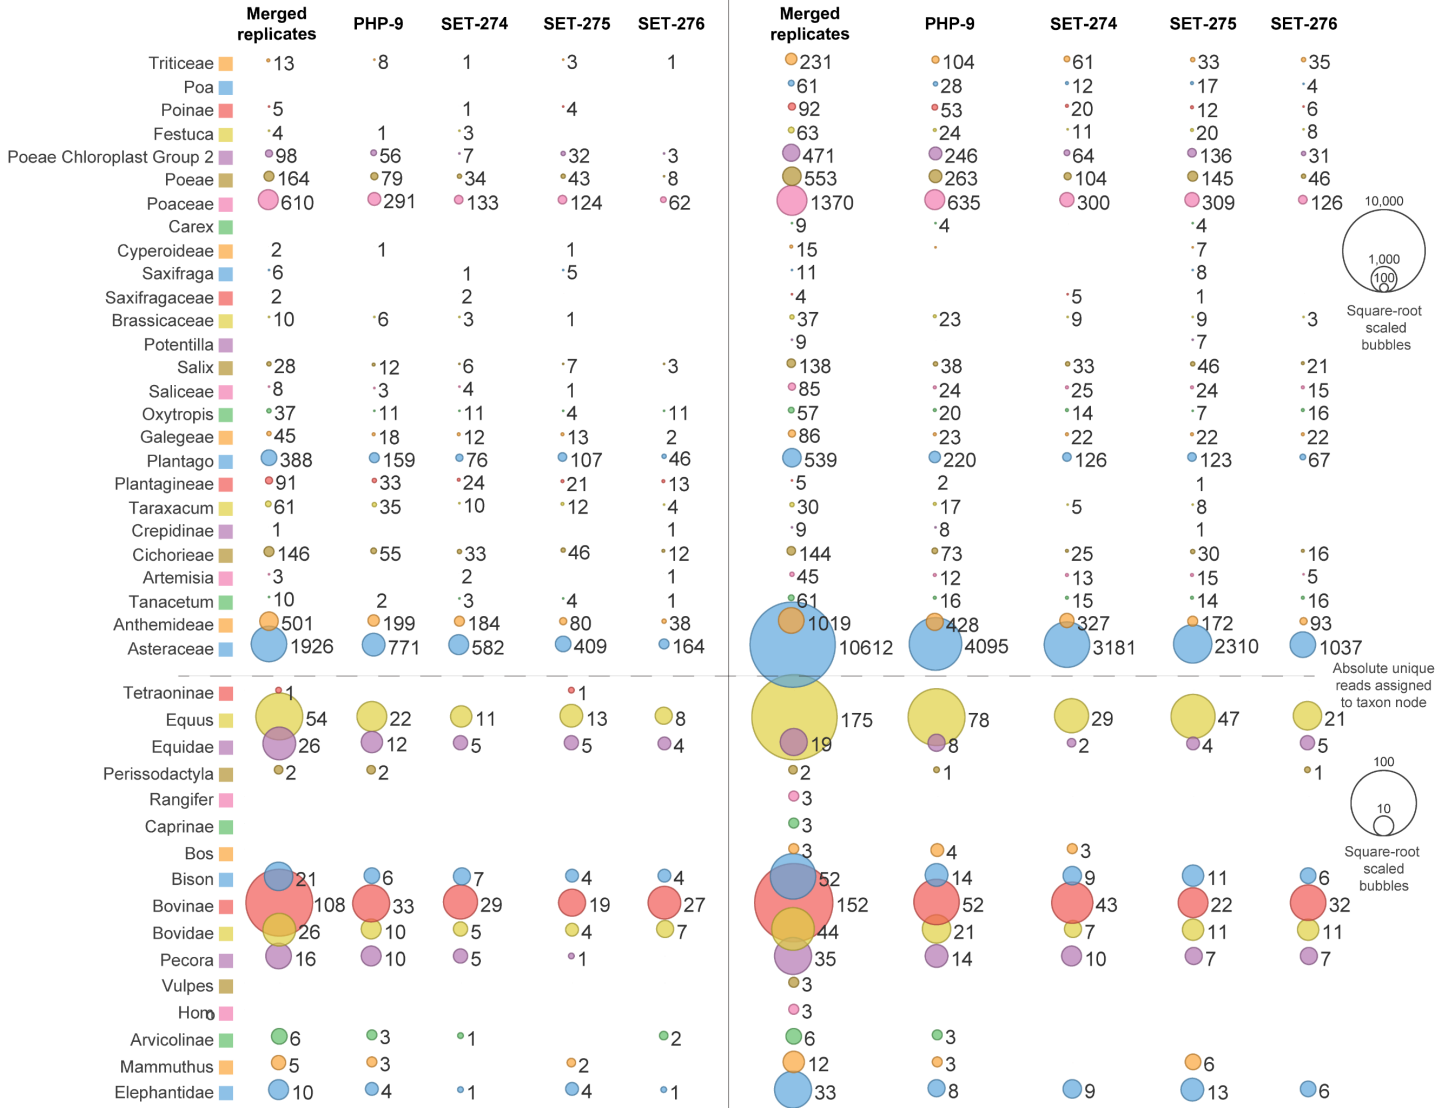

**Supplementary Figure 42** PHP-9 replicates comparison with *PIA* and *MEGAN* taxonomic binning. Select nodes depicted.



SedaDNA ID: PHP-11  
 Core: MM12-118B  
 ~cal yr BP: 9246

**PIA**

• Min coverage = 95%  
 • Min taxonomic diversity score: 0.1

**BLASTn Parameters**

• Top 600 hits  
 • Max Expected 1.0E-5

**MEGAN**

• Min Score = 50  
 • Min Unique Reads = 3  
 • Min Percent Identity = 95 • Weighted LCA at 80%  
 • Top Percent = 20

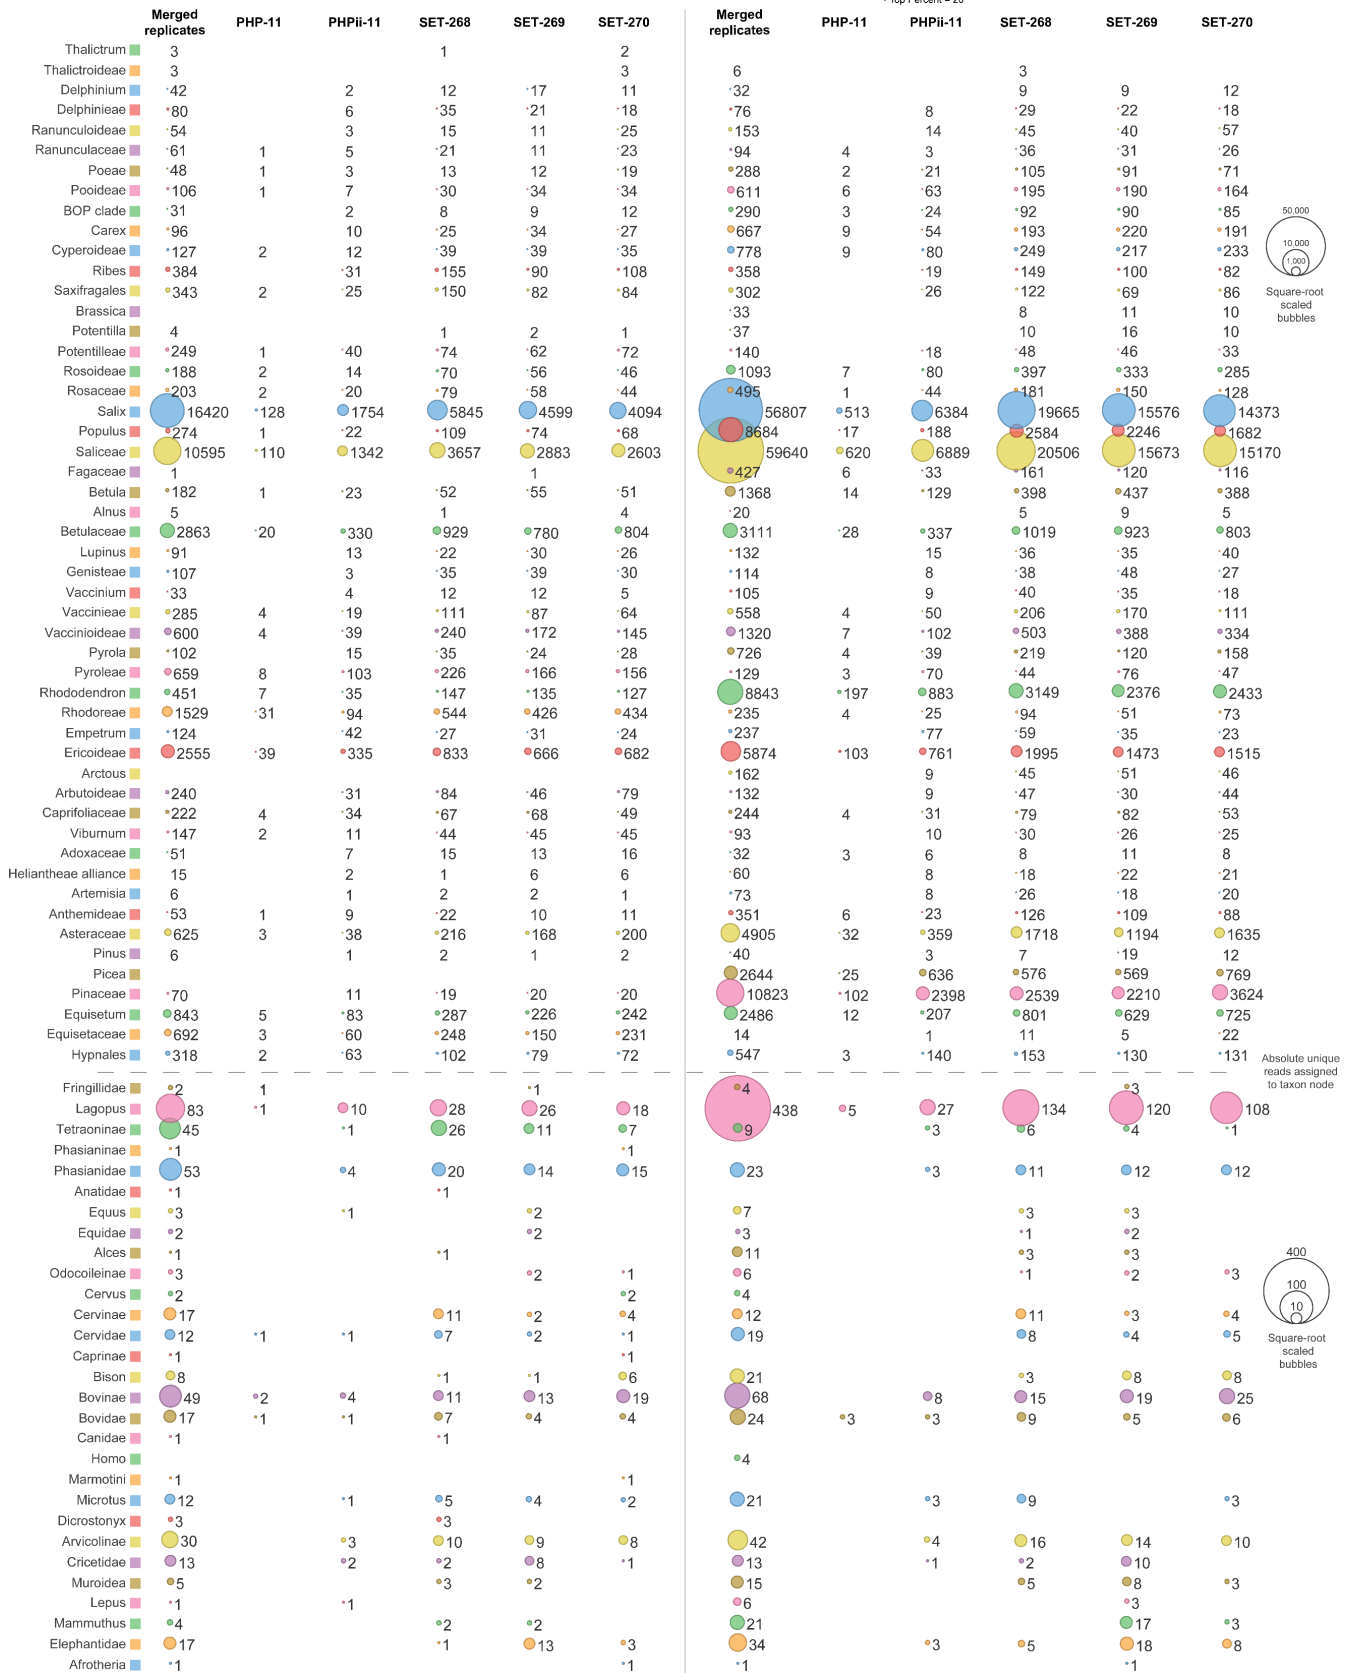

**Supplementary Figure 43** PHP-11 replicates comparison with *PIA* and *MEGAN* taxonomic binning. Select nodes depicted.

SedaDNA ID: PHP-12  
 Core: MM12-119B  
 ~cal yr BP: 10,051

**PIA**

• Min coverage = 95%  
 • Min taxonomic diversity score: 0.1

**BLASTn Parameters**  
 • Top 600 hits  
 • Max Expected 1.0E-5

**MEGAN**

• Min Score = 50  
 • Min Unique Reads = 3  
 • Min Percent Identity = 95 • Weighted LCA at 80%  
 • Top Percent = 20

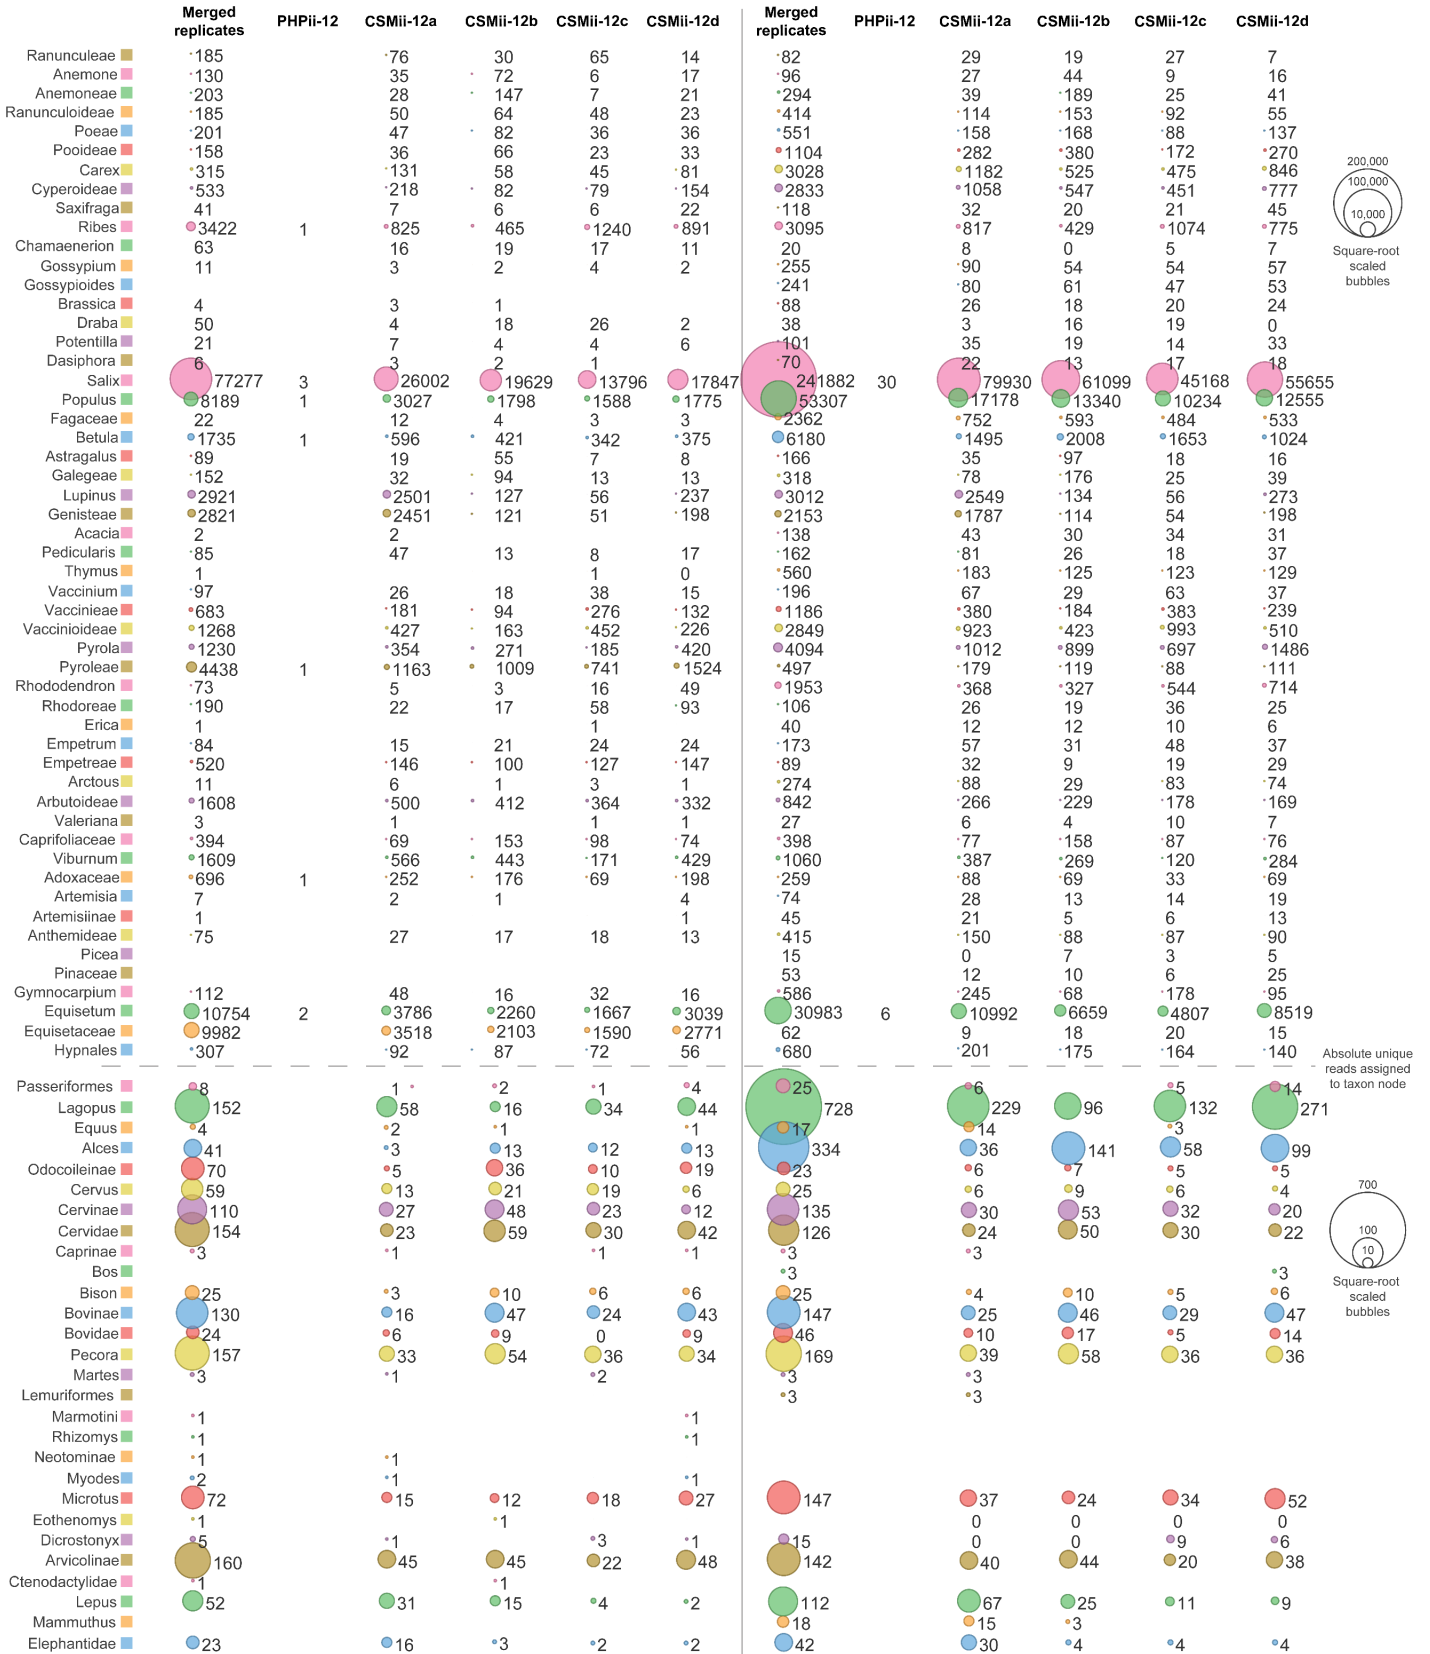

**Supplementary Figure 44** PHP-12 replicates comparison with *PIA* and *MEGAN* taxonomic binning. Select nodes depicted.

# PIA

- Min coverage = 95%
- Min taxonomic diversity score: 0.1

# MEGAN

- Min Score = 50
- Min Unique Reads = 3
- Min Percent Identity = 95
- Weighted LCA at 80%
- Top Percent = 20

## Supplementary Figure 45

PHP-13 replicates comparison with *PIA* and *MEGAN* taxonomic binning. Select nodes depicted.

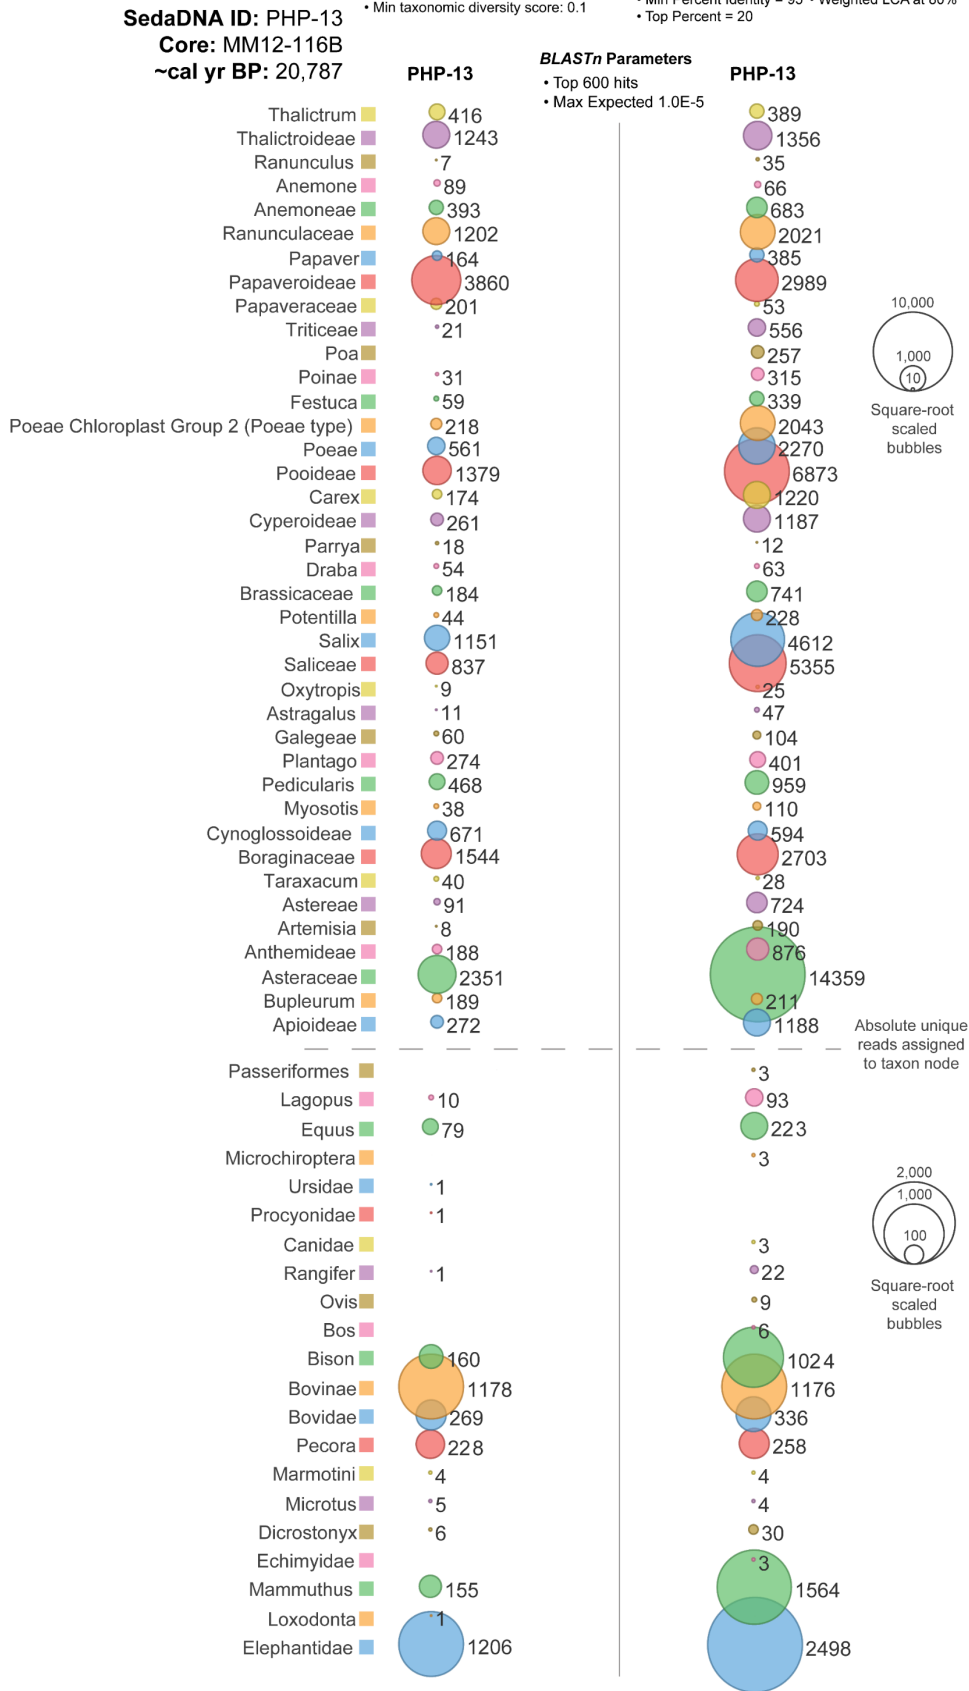

# PIA

- Min coverage = 95%
- Min taxonomic diversity score: 0.1

# MEGAN

- Min Score = 50
- Min Percent Identity = 95
- Min Unique Reads = 3
- Weighted LCA at 80%
- Top Percent = 20

## Supplementary Figure 46

PHP-14 replicates comparison with *PIA* and *MEGAN* taxonomic binning. Select nodes depicted.

SedaDNA ID: PHP-14  
 Core: MM12-115B  
 ~cal yr BP: 19,704

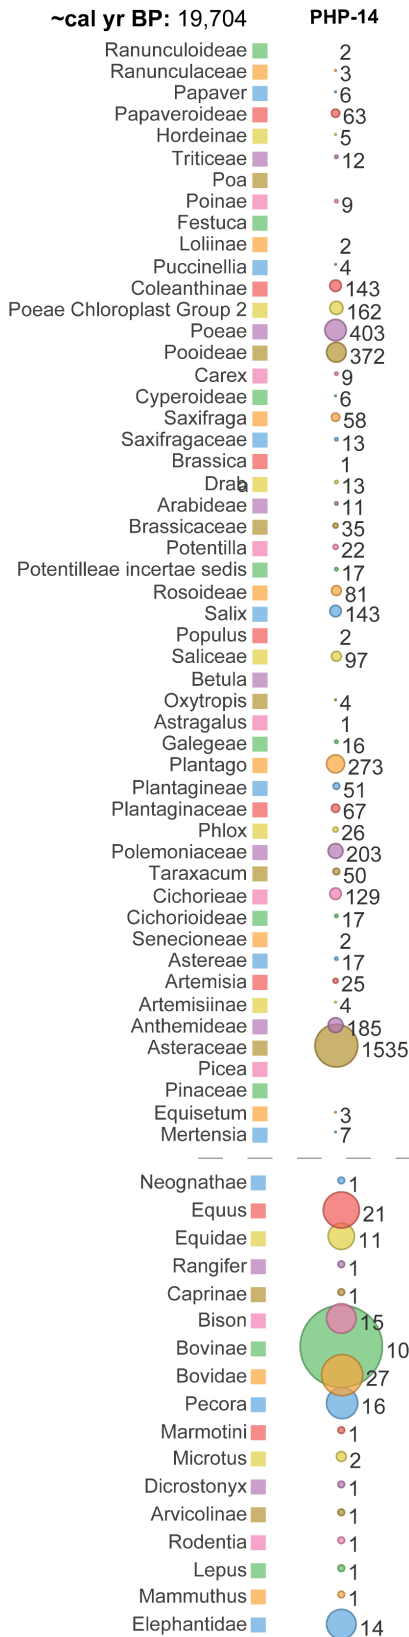

**BLASTn Parameters**

- Top 600 hits
- Max Expected 1.0E-5

**PHP-14**

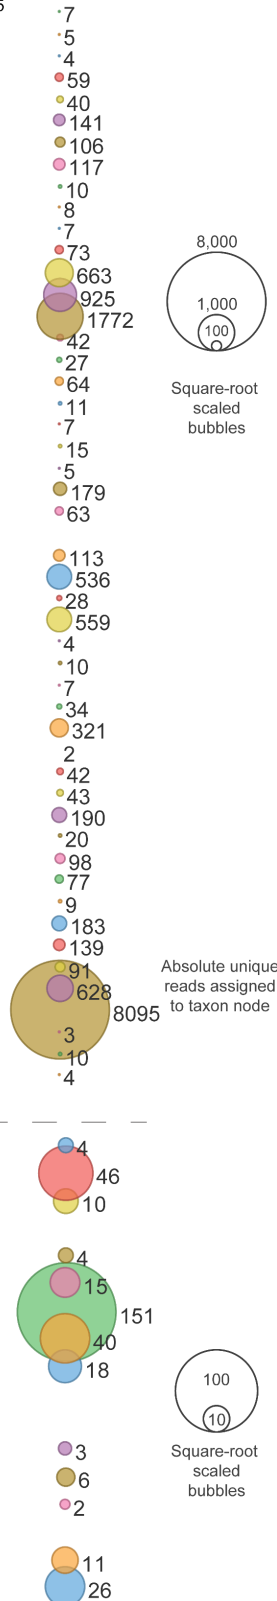

# Supplementary Figure 47

PHP-15 replicates comparison with *PIA* and *MEGAN* taxonomic binning. Select nodes depicted.

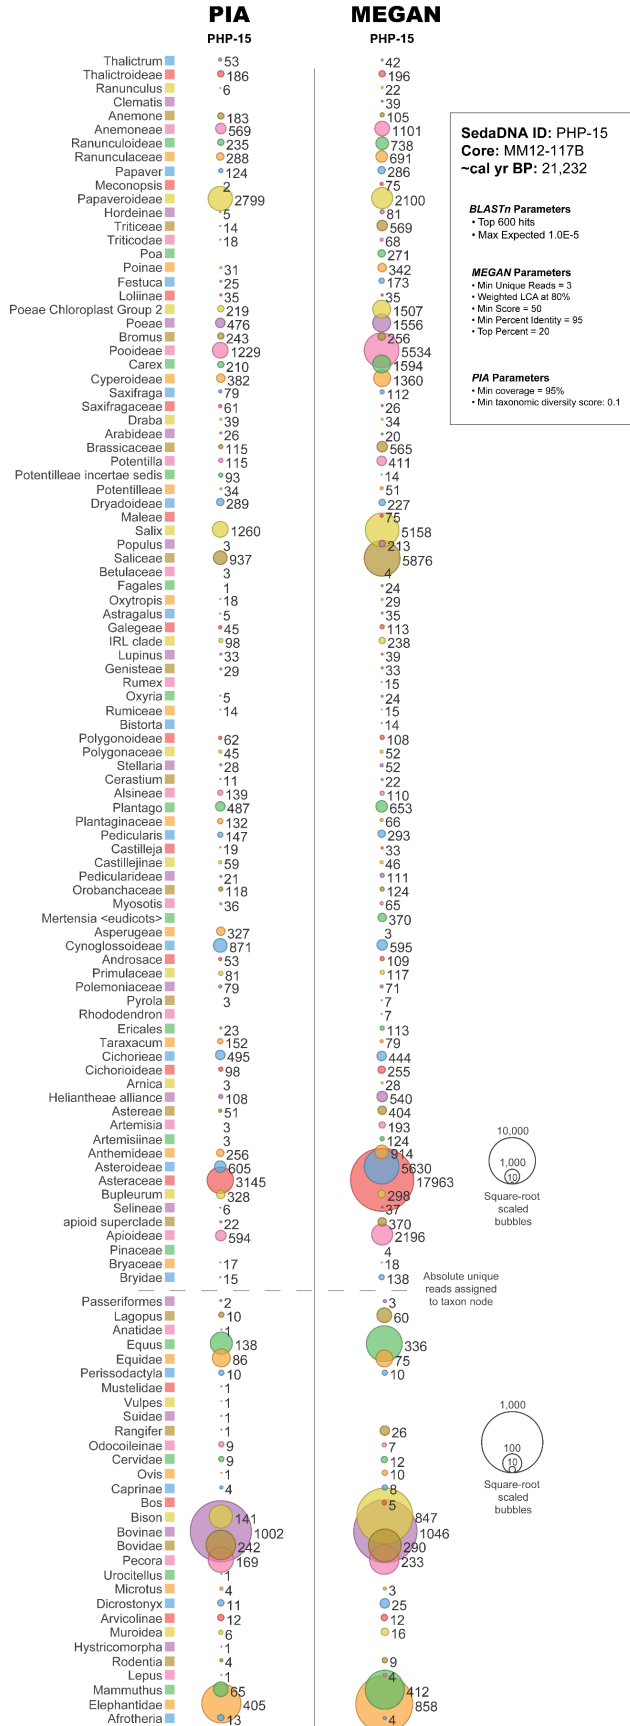

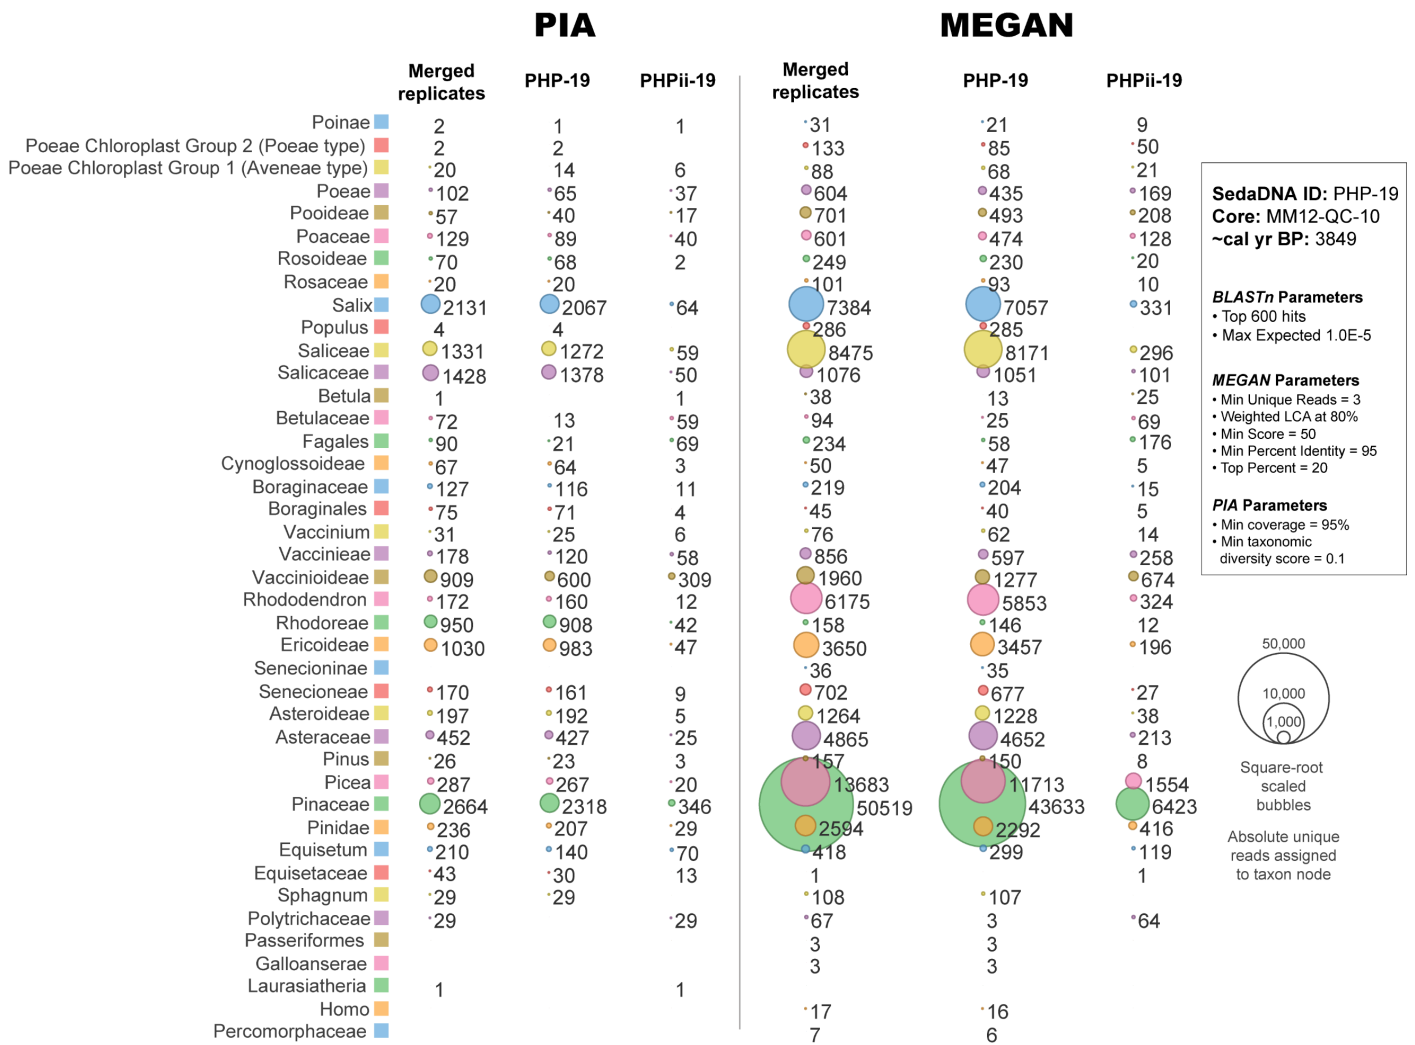

**Supplementary Figure 48** PHP-19 replicates comparison with *PIA* and *MEGAN* taxonomic binning. Select nodes depicted.

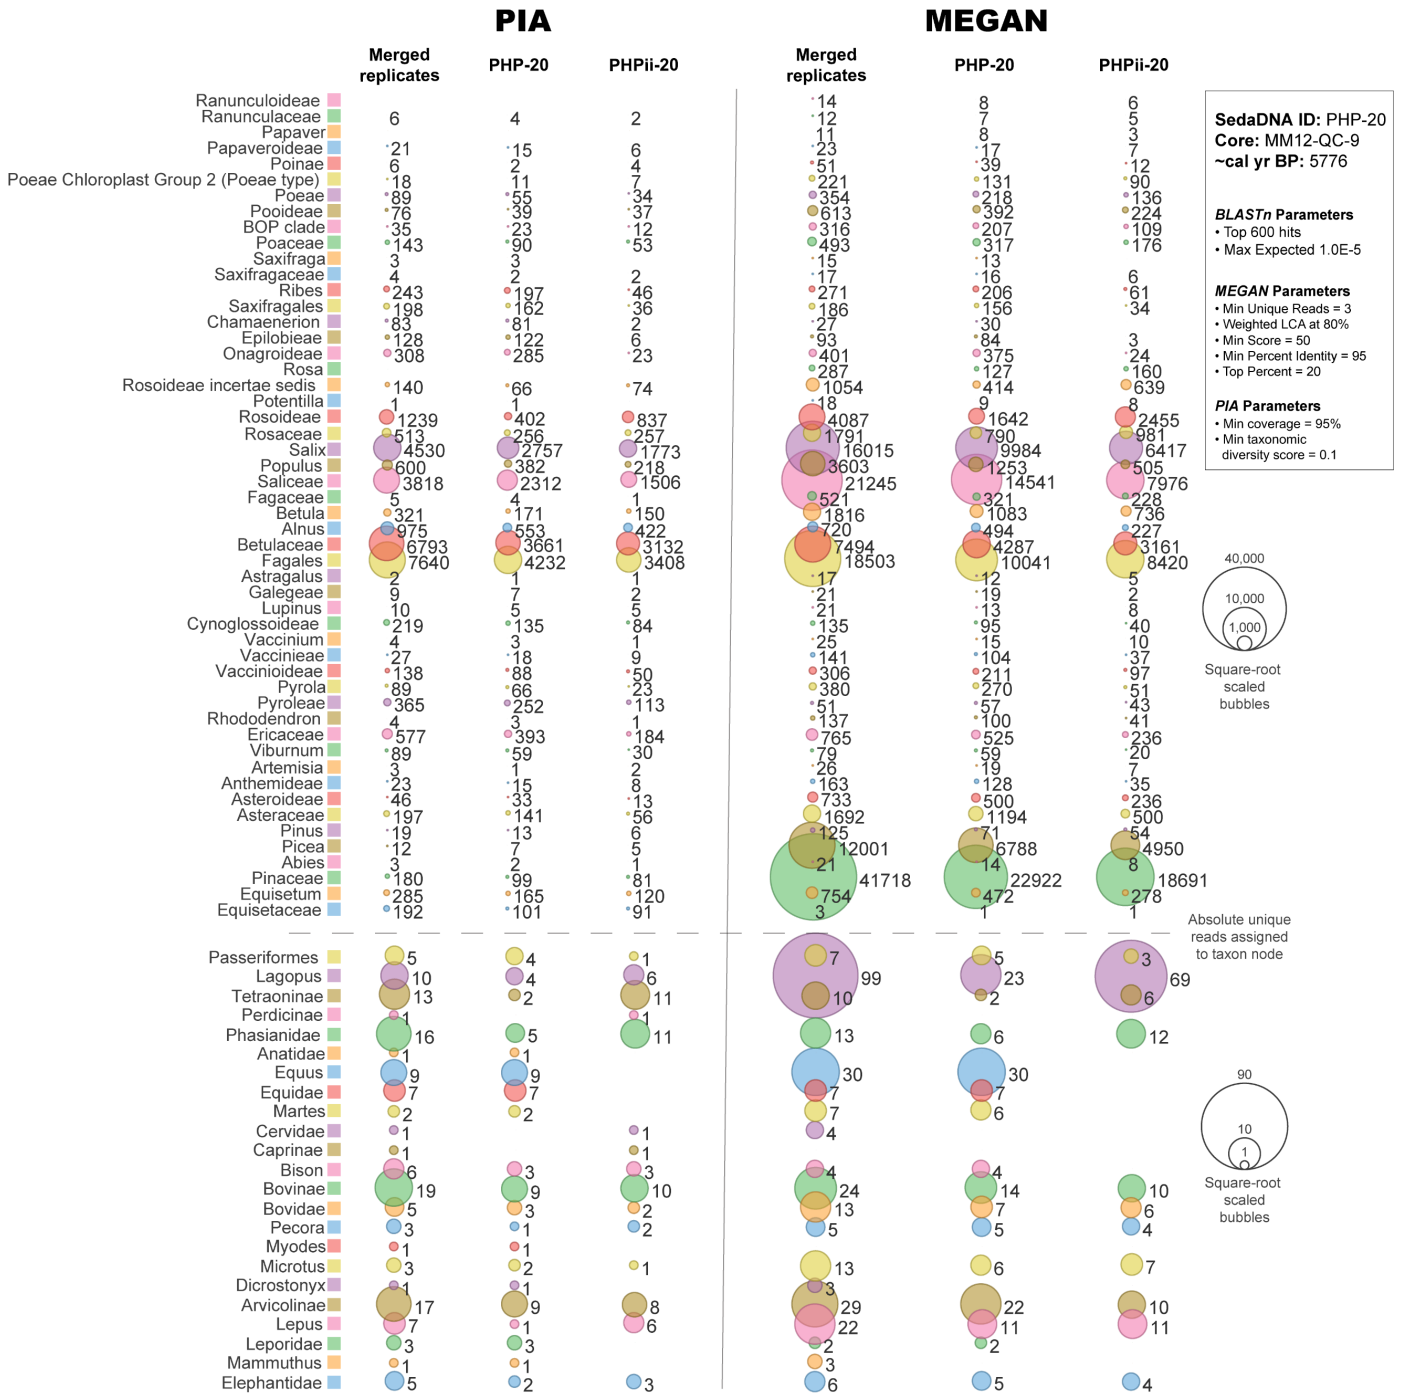

**Supplementary Figure 49** PHP-20 replicates comparison with *PIA* and *MEGAN* taxonomic binning. Select nodes depicted.

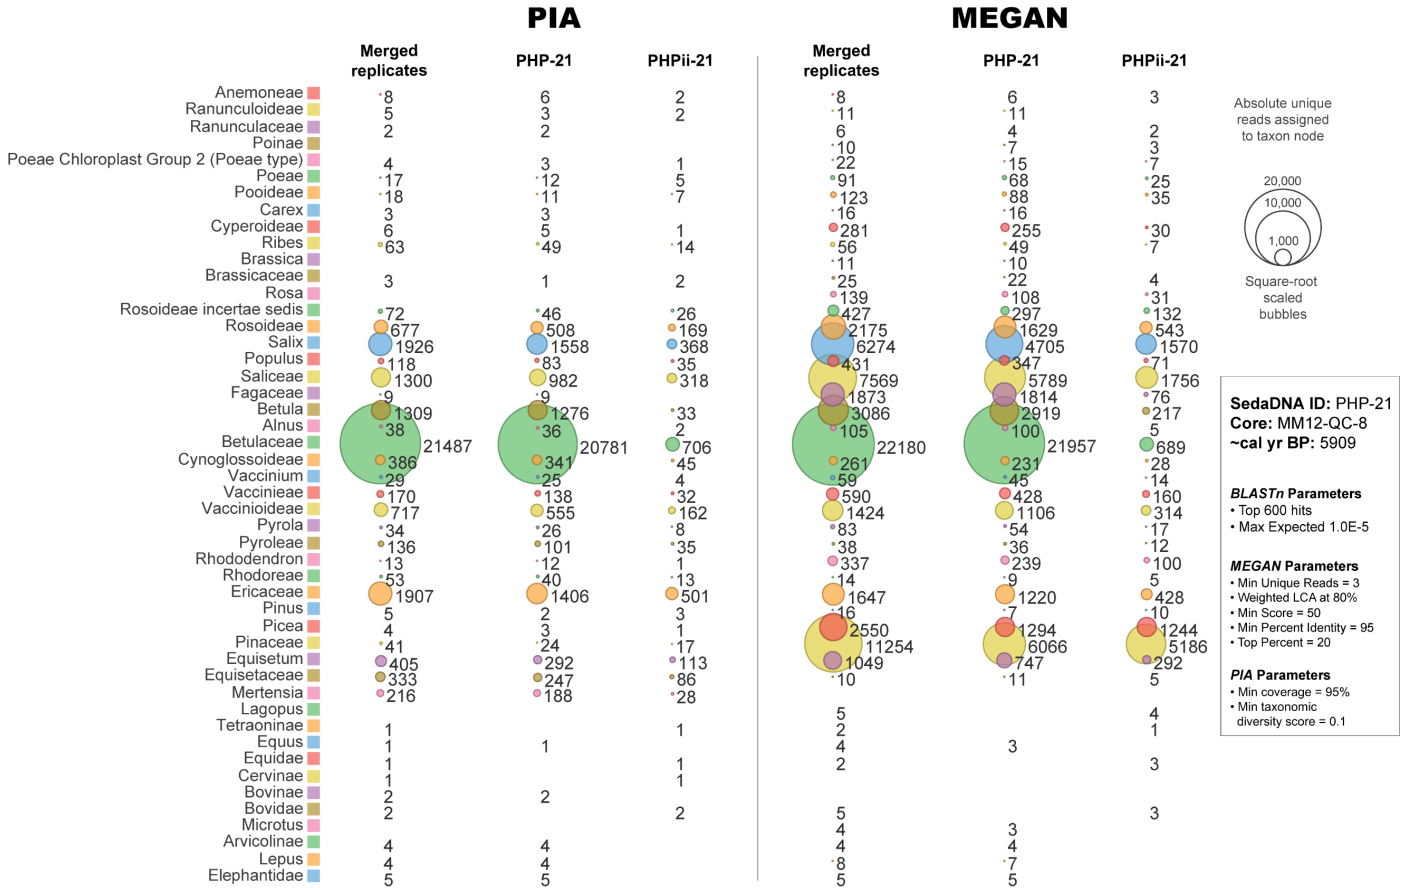

**Supplementary Figure 50** PHP-21 replicates comparison with *PIA* and *MEGAN* taxonomic binning. Select nodes depicted.



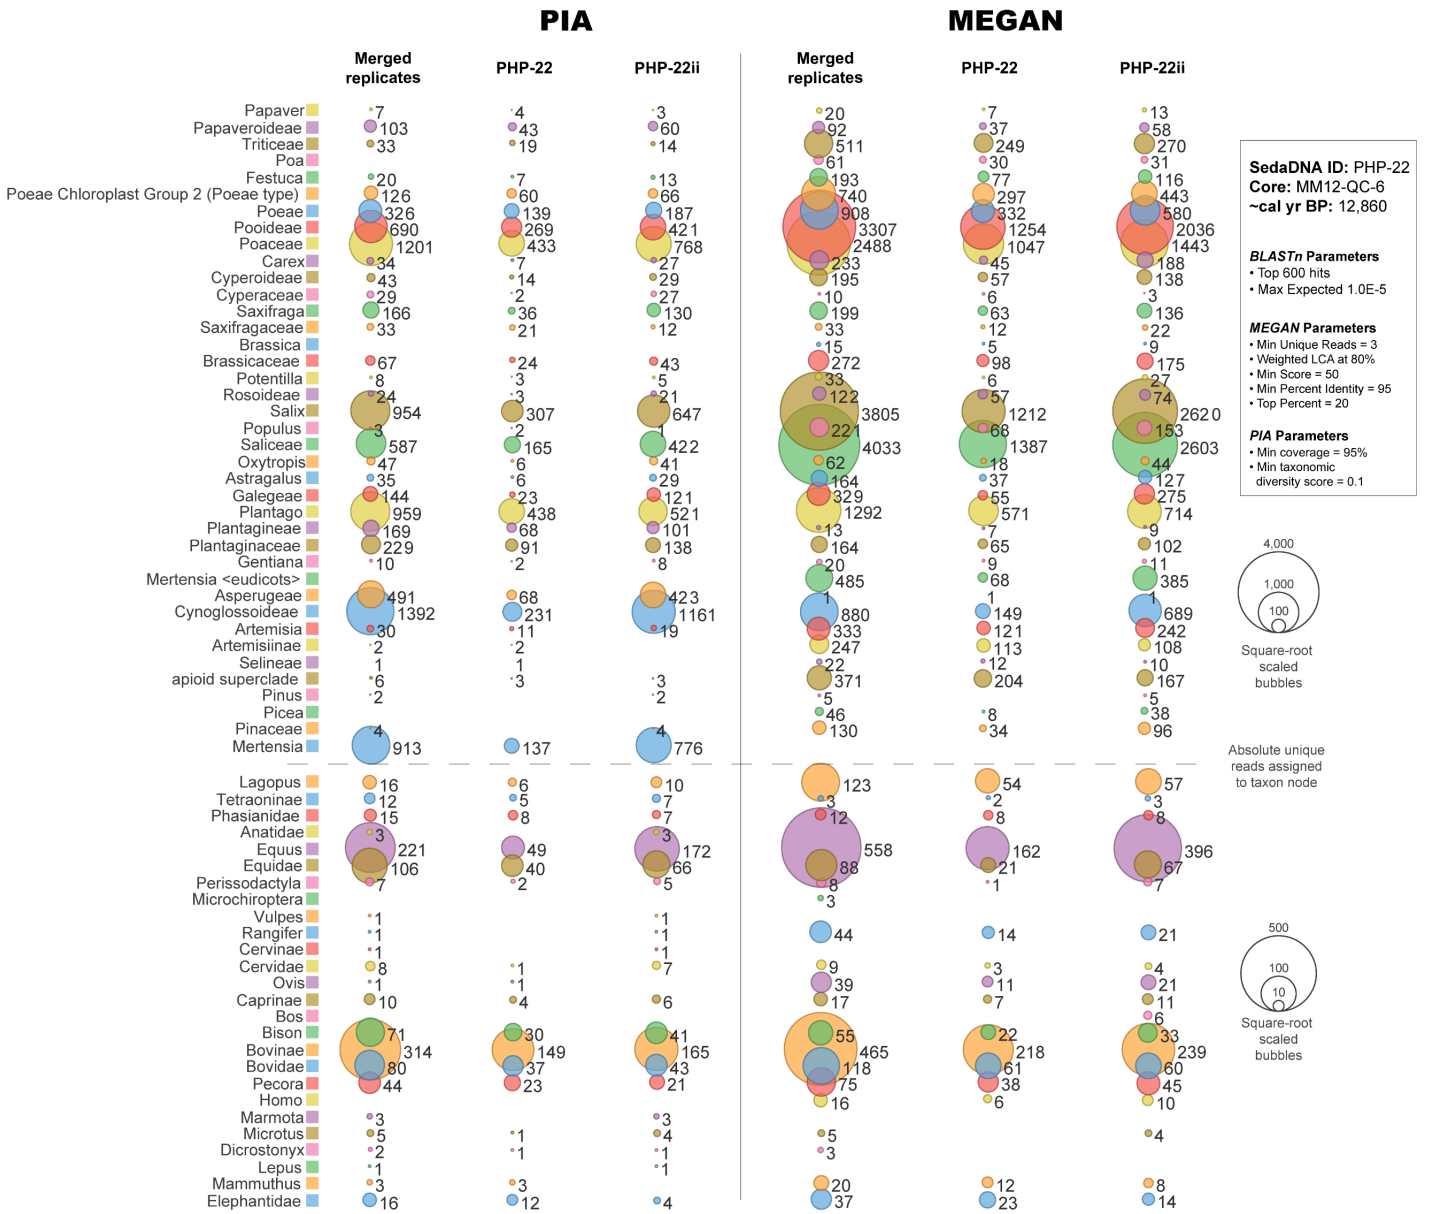

**Supplementary Figure 51** PHP-22 replicates comparison with *PIA* and *MEGAN* taxonomic binning. Select nodes depicted.

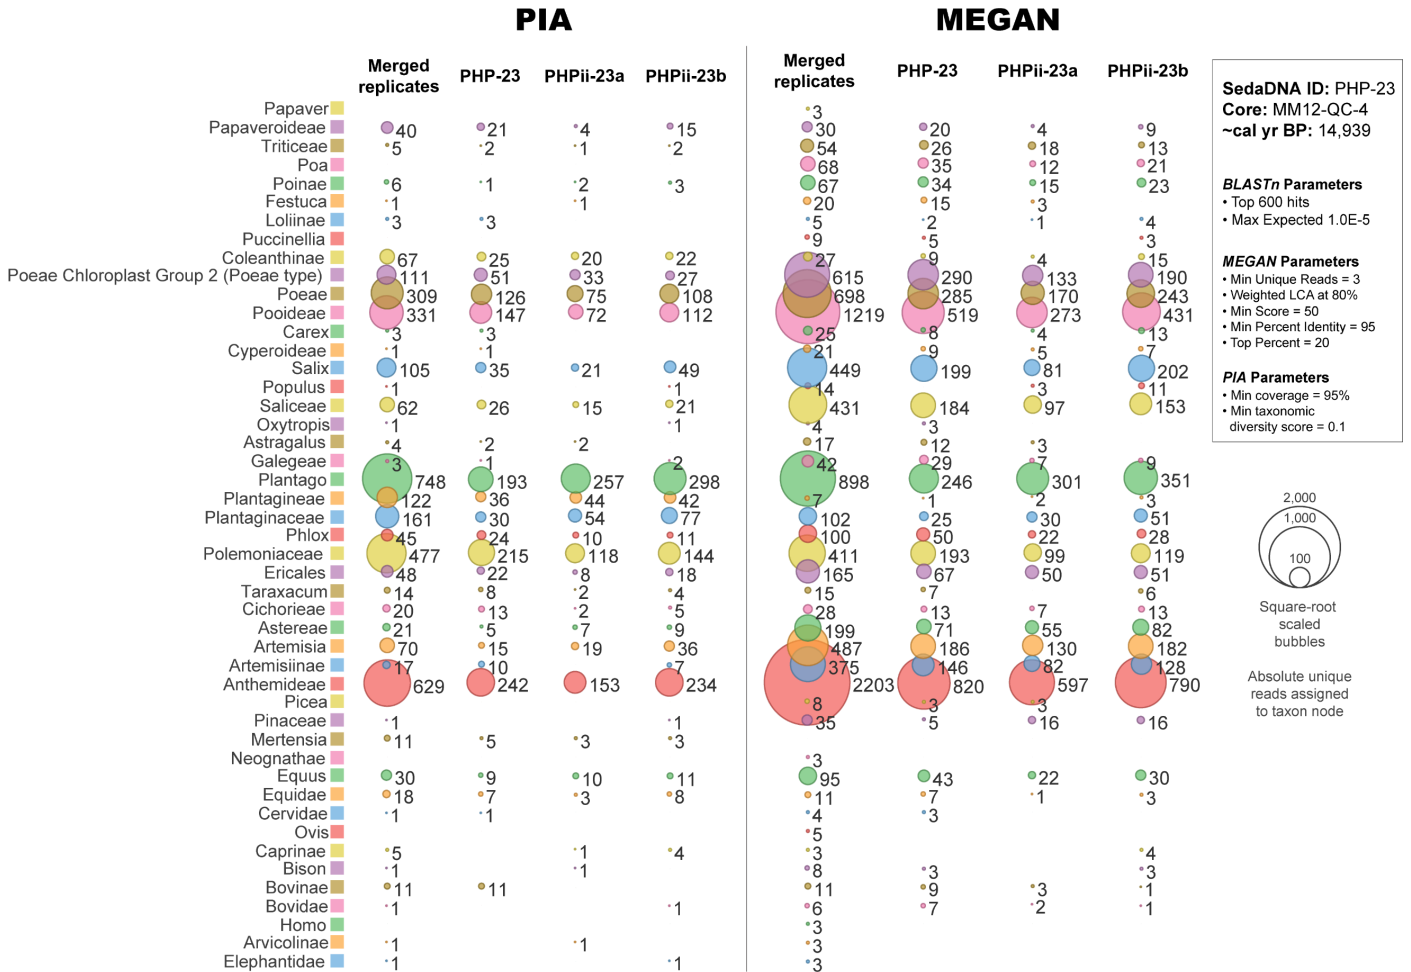

**Supplementary Figure 52** PHP-23 replicates comparison with *PIA* and *MEGAN* taxonomic binning. Select nodes depicted.

# PIA

# MEGAN

PHP-24

PHP-24

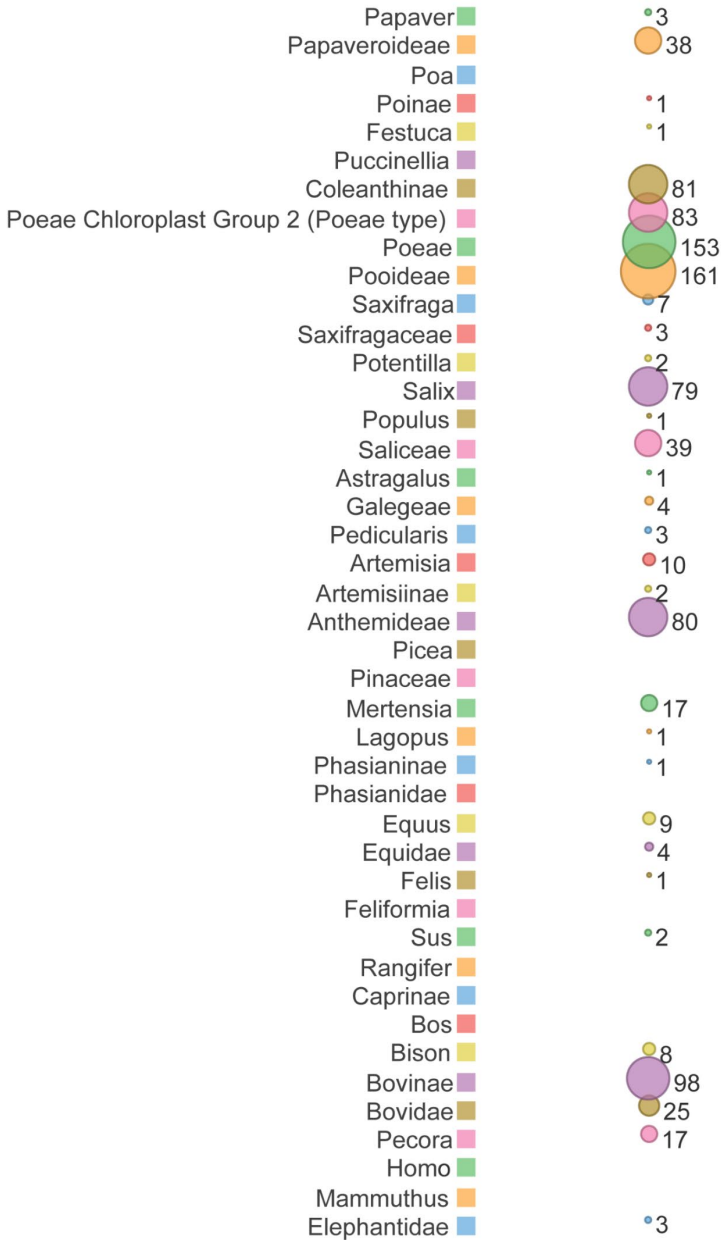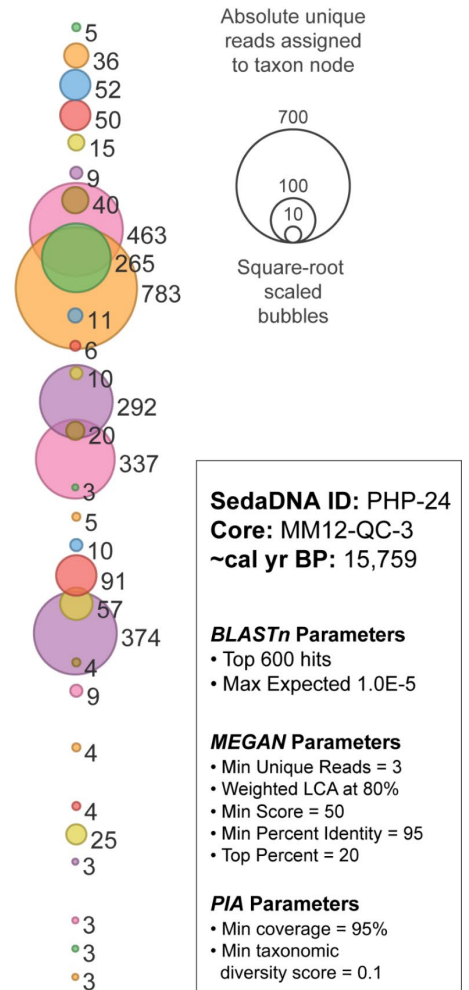

**Supplementary Figure 53** PHP-24 replicates comparison with *PIA* and *MEGAN* taxonomic binning. Select nodes depicted.

# PIA

# MEGAN

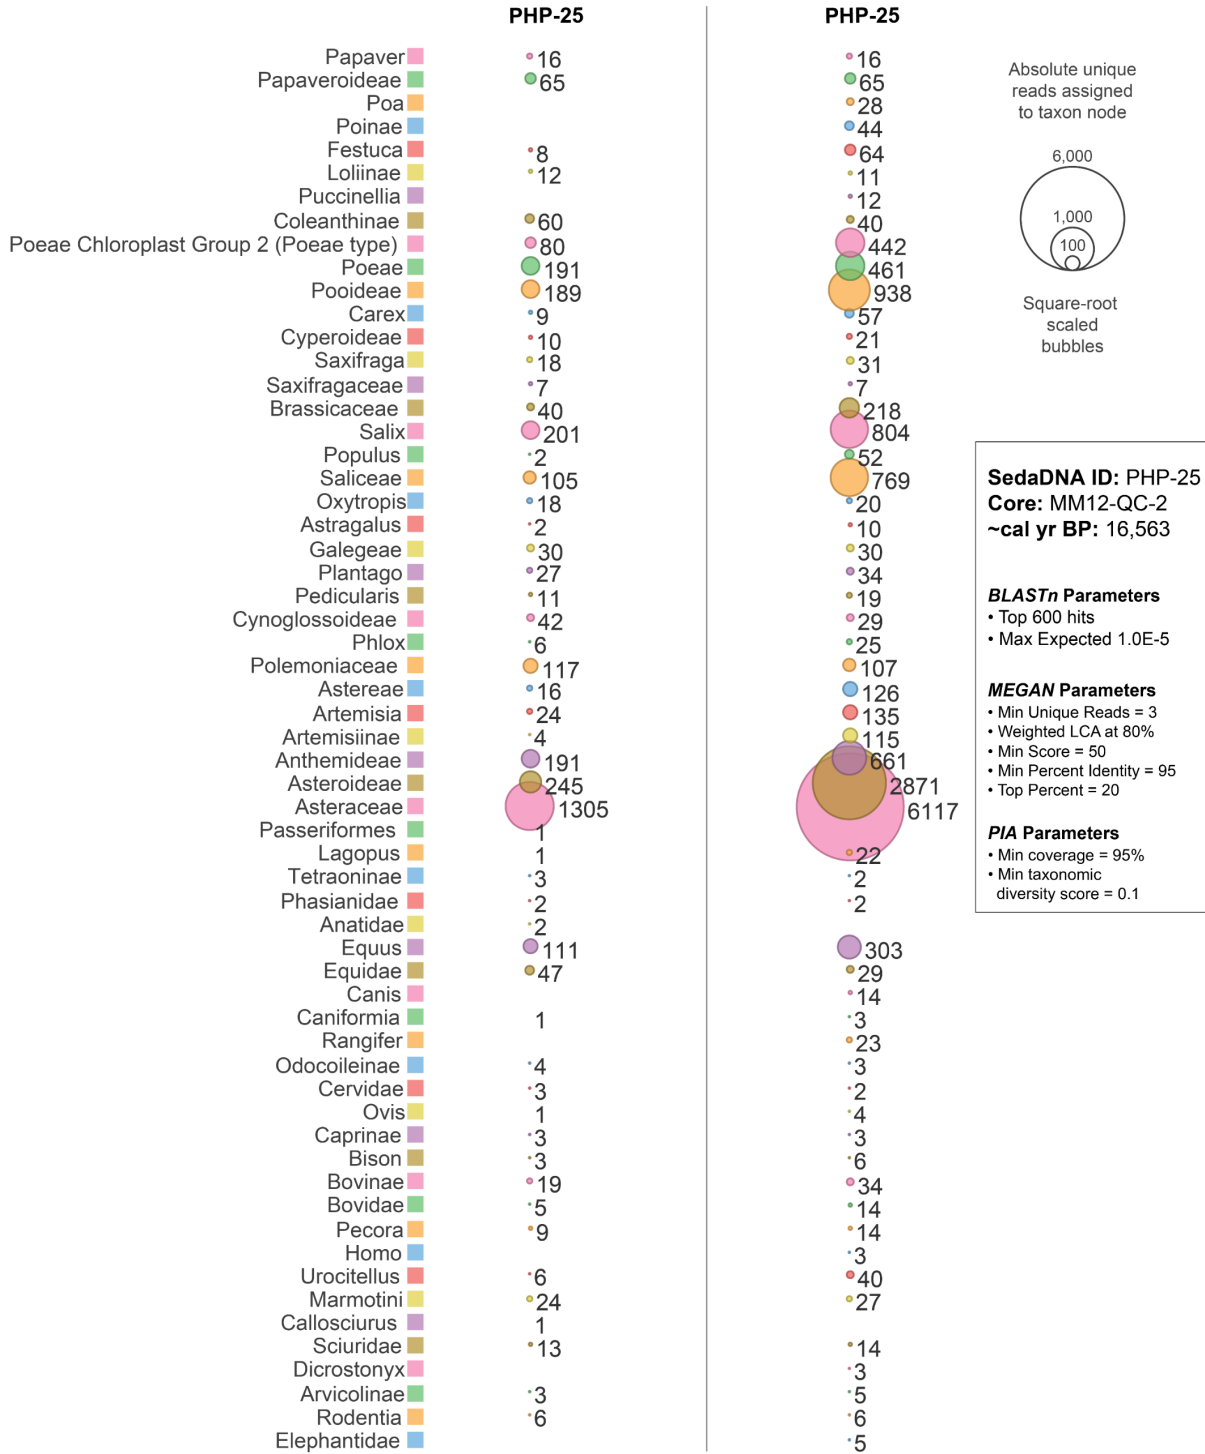

**Supplementary Figure 54** PHP-24 replicates comparison with *PIA* and *MEGAN* taxonomic binning.

# PIA

# MEGAN

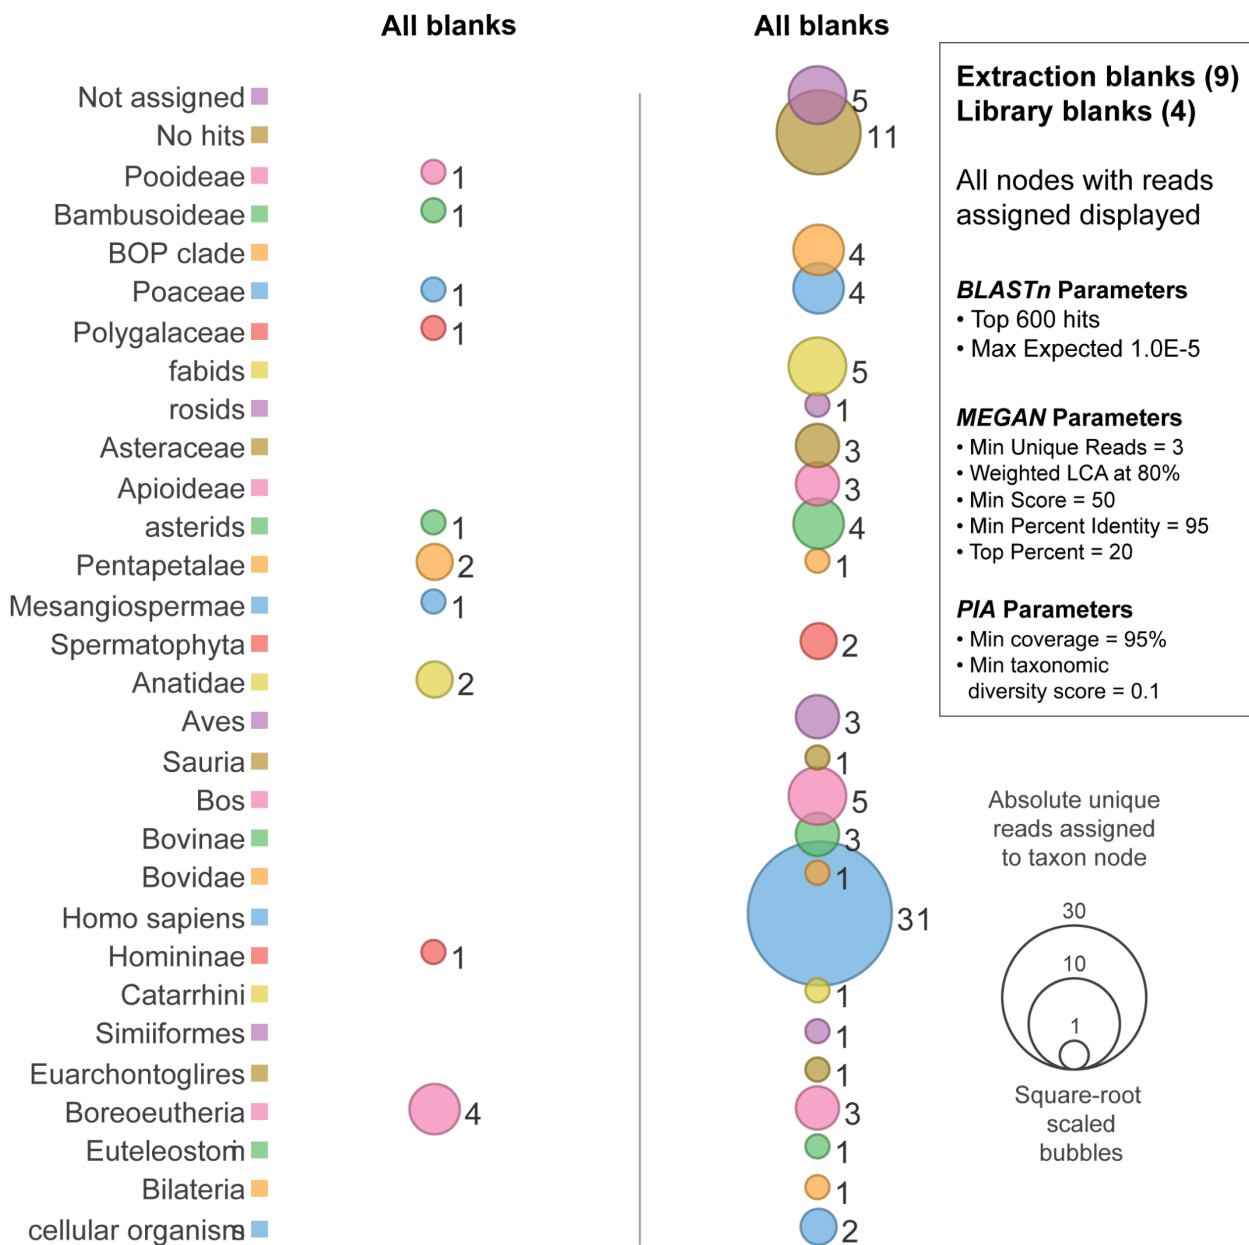

**Supplementary Figure 55** Blanks comparison with *PIA* and *MEGAN* taxonomic binning.

## 2.5.7 GC content and ghost range fragment lengths

### A) Chloroplast reference sequences targeted with PalaeoChip baits

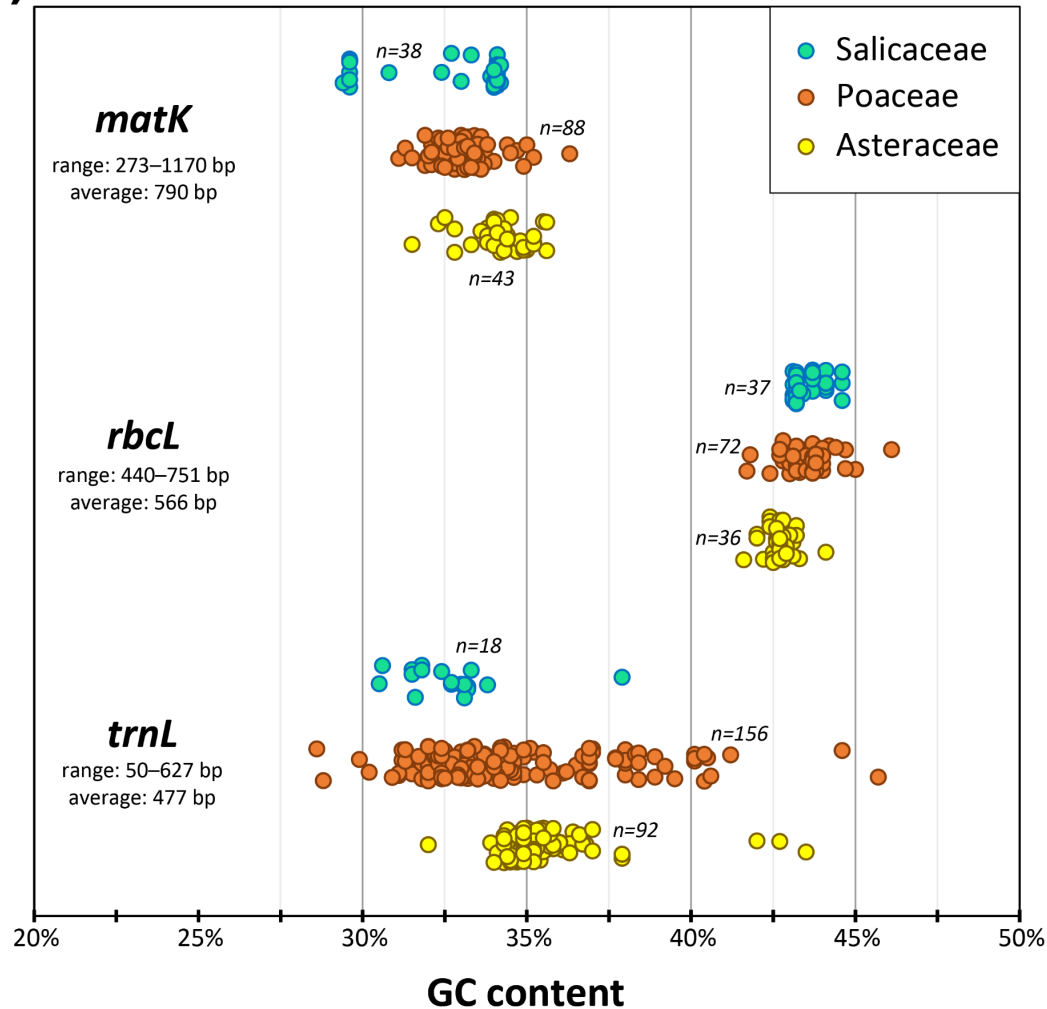

### B) SedaDNA MEGAN binned reads

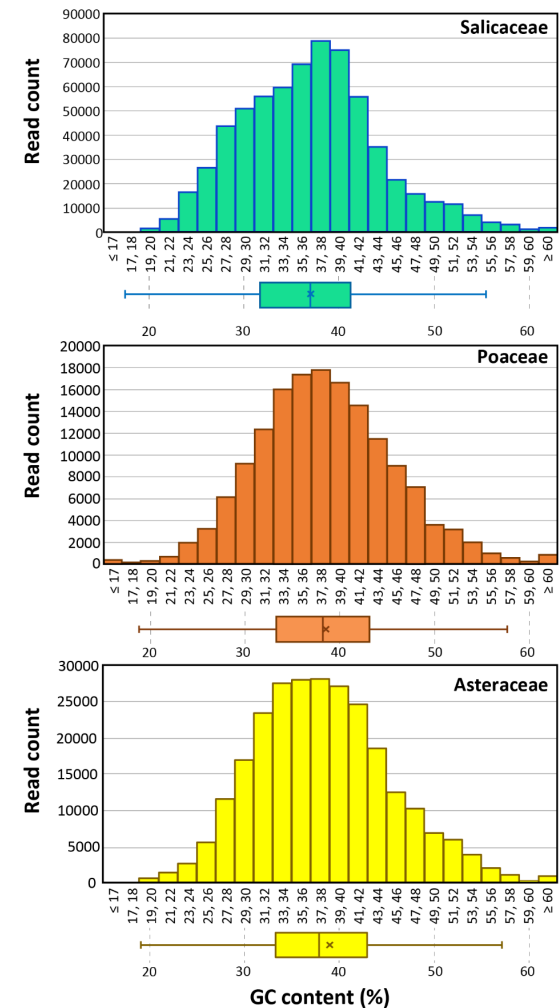

#### Supplementary Figure 56 Assessing GC content of reference sequences and binned reads.

**A)** GC content of reference sequences (limited to Salicaceae, Poaceae, and Asteraceae) of the PalaeoChip Arctic v1.0 bait-set targeting loci within the chloroplast genome. Dots indicate GC content of the reference sequence.

**B)** GC content of sedaDNA reads map-filtered, *BLASTn* assigned, and *MEGAN* binned to the three target loci. Includes molecules enriched from all three chloroplast loci (*matK*, *rbcL*, *trnL*). SedaDNA reads tend to have a GC content mode of ~37% irrespective of family, which may imply some degree of preferential bias. However, reads were sequenced from ~20–80% GC from the three loci, and could be assigned to all three families.

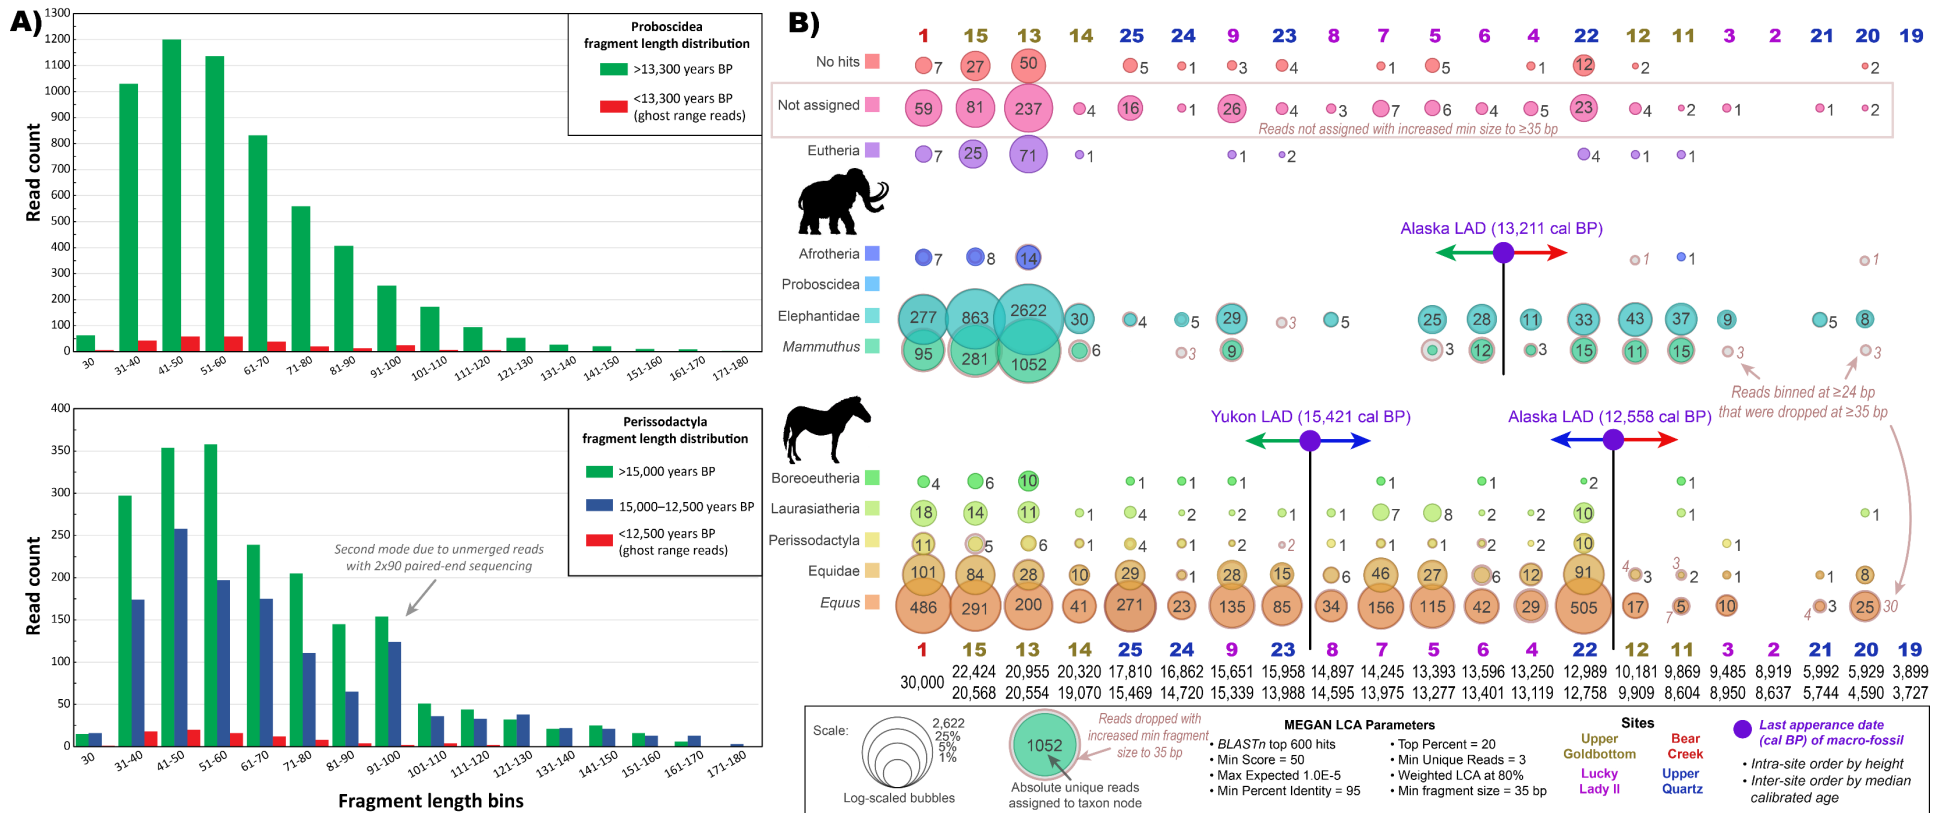

**Supplementary Figure 57** Ghost range fragment length comparison (absolute unique read counts).

**A)** Fragment length distributions of reads binned within Proboscidea and Perissodactyla subdivided between periods that pre and post-date the last known appearance of that taxon with macrofossils in eastern Beringia. Most reads have fragment lengths between 30–50 BP, even among the ghost range samples.

**B)** Reads re-processed in *MEGAN* that were assigned to nodes within Proboscidea and Perissodactyla with an increased minimum fragment length to 35 bp. These plots demonstrate that exceptionally short fragments (~24 bp) have not influenced the taxonomic binning of ghost range reads. Some reads are dropped (not assigned) relative to the main-text bubble chart with the increased minimum fragment length (Fig. 2), but the signal does not disappear.

### 3. Supplementary References

1. Stuart, A. J. Late Quaternary megafaunal extinctions on the continents: a short review. *Geol. J.* **50**, 414–433 (2015).
2. Pitulko, V. V. *et al.* Early human presence in the Arctic: Evidence from 45,000-year-old mammoth remains. *Science (80-. )*. **351**, 260–263 (2016).
3. Maschenko, E. N. *et al.* The Zhenya Mammoth (*Mammuthus primigenius* (Blum.)): Taphonomy, geology, age, morphology and ancient DNA of a 48,000 year old frozen mummy from western Taimyr, Russia. *Quat. Int.* **445**, 104–134 (2017).
4. Graf, K. E. Siberian Odyssey. in *Paleoamerican Odyssey* (eds. Graf, K. E., Ketron, C. V. & Waters, M. R.) 65–80 (Texas A&M University Press, 2014).
5. Pitulko, V. V. *et al.* The Yana RHS site: humans in the arctic before the last glacial maximum. *Science (80-. )*. **303**, 52–56 (2004).
6. Hoffecker, J. F. & Elias, S. A. *Human Ecology of Beringia*. (Columbia University Press, 2007).
7. Nikolskiy, P. & Pitulko, V. Evidence from the Yana Palaeolithic site, Arctic Siberia, yields clues to the riddle of mammoth hunting. *J. Archaeol. Sci.* **40**, 4189–4197 (2013).
8. Clark, P. U. The Last Glacial Maximum. *Science (80-. )*. **325**, 710–714 (2009).
9. Bourgeon, L. Bluefish Cave II ( Yukon Territory , Canada ): Taphonomic Study of a Bone Assemblage. *PaleoAmerica* **1**, 105–108 (2015).
10. Bourgeon, L., Burke, A. & Higham, T. Earliest human presence in North America dated to the last glacial maximum: New radiocarbon dates from Bluefish Caves, Canada. *PLoS One* **12**, e0169486 (2017).
11. Vachula, R. S. *et al.* Sedimentary biomarkers reaffirm human impacts on northern Beringian ecosystems during the Last Glacial period. *Boreas* **49**, 514–525 (2020).
12. Holmes, C. E. Tanana River Valley archaeology circa 14,000 to 9000 BP. *Arctic Anthropol.* **38**, 154–170 (2001).
13. Holmes, C. E. The Beringian and Transitional Periods in Alaska. in *From the Yenisei to the Yukon: Interpreting Lithic Assemblage Variability in Late Pleistocene/Early Holocene Beringia* (eds. Goebel, T. E. & Buvit, I.) 179–191 (Texas A&M University Press, 2011).
14. Potter, B. A. *et al.* Current evidence allows multiple models for the peopling of the Americas. *Sci. Adv.* **4**, 1–9 (2018).
15. Abramova, Z. A. Paleolit Severnoi Azii. in *Paleolit Kavkaza i Severnoi Azii* (ed. Boriskovskii, P. I.) 145–243 (Nauka, 1989).
16. Abramova, Z. A., Astakhov, S. N., Vasil'ev, S. A., Ermolva, N. M. & Lisitsyn, N. F. *Paleolit Eniseya*. (Nauka, 1991).
17. Goebel, T. Siberian middle Upper Paleolithic. in *Encyclopedia of prehistory. Vol 2: Arctic and Subarctic* (eds. Peregrine, P. N. & Ember, M.) 192–196 (Kluwer Academic Publishers, 2002).
18. Ermolova, N. M. *Teriofauna doliny Angary v pozdem antropogene*. (Nauka, 1978).
19. Goebel, T. Pleistocene Human Colonization of Siberia and Peopling of the Americas: An



- Ecological Approach. *Evol. Anthropol.* **8**, 208–227 (1999).
20. Davis, R. S. & Ranov, V. A. Recent Work on the Paleolithic of Central Asia. *Evol. Anthropol.* **8**, 186–193 (1999).
  21. Dolukhanov, P. M., Shukurov, A. M., Tarasov, P. E. & Zaitseva, G. I. Colonization of Northern Eurasia by modern humans: Radiocarbon chronology and environment. *J. Archaeol. Sci.* **29**, 593–606 (2002).
  22. Graf, K. E. Adandomment of the Siberian Mammoth-Steppe during the LGM: Evidence from the calibration of <sup>14</sup>C-dated archaeological occupations. *Curr. Res. Pleistocene* **22**, 2–5 (2005).
  23. Graf, K. E. ‘The Good, the Bad, and the Ugly’: evaluating the radiocarbon chronology of the middle and late Upper Paleolithic in the Enisei River valley, south-central Siberia. *J. Archaeol. Sci.* **36**, 694–707 (2009).
  24. Graf, K. E. Hunter-gatherer dispersals in the Mammoth-Steppe: Technological provisioning and land-use in the Enisei River Valley, south-central Siberia. *J. Archaeol. Sci.* **37**, 210–23 (2010).
  25. Fiedel, S. J. & Kuzmin, Y. V. Radiocarbon date frequency as an index of intensity of Paleolithic occupation of Siberia: Did humans react predictably to climate oscillations? *Radiocarbon* **49**, 741–756 (2007).
  26. Kuzmin, Y. V. & Keates, S. G. Dates are not just data: Paleolithic settlement patterns in Siberia derived from radiocarbon records. *Am. Antiq.* **70**, 773–789 (2005).
  27. Kuzmin, Y. V. Siberia at the Last Glacial Maximum: Environment and archaeology. *J. Archaeol. Res.* **16**, 163–221 (2008).
  28. Izuho, M. Human Technological and Behavioral Adaptation to Landscape Changes around the Last Glacial Maximum in Japan: A Focus on Hokkaido. in *Paleoamerican Odyssey* (eds. Graf, K. E., Ketron, C. V. & Waters, M. R.) 45–64 (Texas A&M University Press, 2014).
  29. Buvit, I. & Terry, K. Outside Beringia: Why the Northeast Asian Upper Paleolithic Record Does Not Support a Long Standstill Model. *PaleoAmerica* **5563**, 1–5 (2016).
  30. Goebel, T. The ‘microblade adaptation’ and recolonization of Siberia during the late Upper Pleistocene. in *Thinking small: Global perspectives on microlithization. Archaeological Paper No. 12* (eds. Elston, R. G. & Kuhn, S. L.) 117–131 (American Anthropological Association, 2002).
  31. Bronk Ramsey, C. Deposition models for chronological records. *Quat. Sci. Rev.* **27**, 42–60 (2008).
  32. Reimer, P. J. *et al.* The IntCal20 Northern Hemisphere Radiocarbon Age Calibration Curve (0–55 cal kBP). *Radiocarbon* **62**, 725–757 (2020).
  33. D’Costa, V. M. *et al.* Antibiotic resistance is ancient. *Nature* **477**, 457–61 (2011).
  34. Froese, D. G., Zazula, G. D. & Reyes, A. V. Seasonality of the late Pleistocene Dawson tephra and exceptional preservation of a buried riparian surface in central Yukon Territory, Canada. *Quat. Sci. Rev.* **25**, 1542–1551 (2006).
  35. Mahony, M. E. 50,000 years of paleoenvironmental change recorded in meteoric waters

- and coeval paleoecological and cryostratigraphic indicators from the Klondike goldfields, Yukon, Canada. (University of Alberta, 2015). doi:10.7939/R34T6FF58
36. Sadoway, T. R. A Metagenomic Analysis of Ancient Sedimentary DNA Across the Pleistocene-Holocene Transition. (McMaster University, 2014).
  37. Fægri, K., Kaland, P. E. & Krzywinski, K. *Textbook of pollen analysis. Textbook of pollen analysis.* (John Wiley & Sons Ltd., 1989).
  38. McAndrews, J. H., Berti, A. A. & Norris, G. *Key to the quaternary pollen and spores of the Great Lakes region.* (Royal Ontario Museum, 1973).
  39. Hansen, B. C. Conifer stomate analysis as a paleoecological tool: An example from the Hudson Bay Lowlands. *Can. J. Bot.* **73**, 244–252 (1995).
  40. van Geel, B. & Aptroot, A. Fossil ascomycetes in Quaternary deposits. *Nov. Hedwigia* 313–329 (2006). doi:10.1127/0029-5035/2006/0082-0313
  41. van Geel, B. Non-pollen palynomorphs. in *Tracking environmental change using lake sediments* 99–119 (Springer, 2001).
  42. Haas, J. N. Neorhabdocoela oocytes-Palaeoecological indicators found in pollen preparations from Holocene freshwater lake sediments. *Rev. Palaeobot. Palynol.* **91**, 371–382 (1996).
  43. Turton, C. L. & McAndrews, J. H. Rotifer loricas in second millennium sediment of Crawford Lake, Ontario, Canada. *Rev. Palaeobot. Palynol.* **141**, 1–6 (2006).
  44. McCarthy, F. M. C., Pilkington, P. M., Volik, O., Heyde, A. & Cocker, S. L. Non-pollen Palynomorphs in Freshwater Sediments and their Palaeolimnological Potential and Selected Applications. *Geol. Soc. London, Spec. Publ.* **511**, SP511-2020–109 (2020).
  45. *Non-pollen palynomorphs as relevant indicators in palaeoecology and archaeobotany. Special Issue: Review of Palaeobotany and Palynology* **186**, (2012).
  46. Miola, A. Tools for Non-Pollen Palynomorphs (NPPs) analysis: A list of Quaternary NPP types and reference literature in English language (1972-2011). *Rev. Palaeobot. Palynol.* 142–161 (2012). doi:10.1016/j.revpalbo.2012.06.010
  47. Langeveld, B. W. *et al.* A multidisciplinary study of a Late Pleistocene arctic ground squirrel (*Urocyon parryi*) midden from Yukon, Canada. *Quat. Res.* **89**, 333–351 (2018).
  48. Murchie, T. J. *et al.* Optimizing extraction and targeted capture of ancient environmental DNA for reconstructing past environments using the PalaeoChip Arctic-1.0 bait-set. *Quat. Res.* **99**, 305–328 (2021).
  49. Karpinski, E., Mead, J. I. & Poinar, H. N. Molecular identification of paleofeces from Bechan Cave, southeastern Utah, USA. *Quat. Int.* **443**, 140–146 (2016).
  50. Dabney, J. *et al.* Complete mitochondrial genome sequence of a Middle Pleistocene cave bear reconstructed from ultrashort DNA fragments. *Proc. Natl. Acad. Sci.* **110**, 15758–15763 (2013).
  51. Enk, J. *et al.* Mammoth population dynamics in Late Pleistocene North America: Divergence, Phylogeography and Introgression. *Front. Ecol. Evol.* **4**, 1–13 (2016).
  52. Meyer, M. & Kircher, M. Illumina sequencing library preparation for highly multiplexed

- target capture and sequencing. *Cold Spring Harb. Protoc.* **5**, (2010).
53. Jónsson, H., Ginolhac, A., Schubert, M., Johnson, P. L. F. & Orlando, L. MapDamage2.0: Fast approximate Bayesian estimates of ancient DNA damage parameters. *Bioinformatics* **29**, 1682–1684 (2013).
  54. Percy, D. M. *et al.* Understanding the spectacular failure of DNA barcoding in willows (*Salix*): Does this result from a trans-specific selective sweep? *Mol. Ecol.* 4737–4756 (2014). doi:10.1111/mec.12837
  55. Hübner, R. *et al.* HOPS: automated detection and authentication of pathogen DNA in archaeological remains. *Genome Biol.* **20**, (2019).
  56. Dabney, J., Meyer, M. & Pääbo, S. Ancient DNA damage. *Cold Spring Harb. Perspect. Biol.* **5**, 1–7 (2013).
  57. Deagle, B. E., Eveson, J. P. & Jarman, S. N. Quantification of damage in DNA recovered from highly degraded samples - A case study on DNA in faeces. *Front. Zool.* **3**, 11 (2006).
  58. Kistler, L., Ware, R., Smith, O., Collins, M. & Allaby, R. G. A new model for ancient DNA decay based on paleogenomic meta-analysis. *Nucleic Acids Res.* **45**, 6310–6320 (2017).
  59. Lisiecki, L. E. & Raymo, M. E. A Pliocene-Pleistocene stack of 57 globally distributed benthic  $\delta$  18O records. *Paleoceanography* **20**, 1–17 (2005).
  60. Cribdon, B., Ware, R., Smith, O., Gaffney, V. & Allaby, R. G. PIA: More Accurate Taxonomic Assignment of Metagenomic Data Demonstrated on sedaDNA From the North Sea. *Front. Ecol. Evol.* **8**, 1–12 (2020).
  61. Conroy, K. J. *et al.* Tracking late-Quaternary extinctions in interior Alaska using megaherbivore bone remains and dung fungal spores. *Quat. Res.* 1–12 (2020). doi:10.1017/qua.2020.19
  62. Grootes, P. M. & Stuiver, M. Oxygen 18/16 variability in Greenland snow and ice with 10-3- to 105-year time resolution. *J. Geophys. Res. Ocean.* **102**, 26455–26470 (1997).
